# Supplementary material for: Computational Insights on the Chemical Reactivity of Functionalized and Crosslinked Polyketones to Cu2+ Ion for Wastewater Treatment
Source: MDPI journal article supplement (doi:10.3390/polym15153157), 2023-07-25
Supplement: s1 [file s1]

Supporting Information for

# Computational Insights on the Chemical Reactivity of Functionalized and Crosslinked Polyketones to Cu<sup>2+</sup> Ion for Wastewater Treatment

Daniela E. Ortega <sup>1,\*</sup>, Diego Cortés-Arriagada <sup>2</sup> and Rodrigo Araya-Hermosilla <sup>2</sup>

<sup>1</sup> Centro Integrativo de Biología y Química Aplicada (CIBQA), Facultad de Salud, Universidad Bernardo O'Higgins, General Gana 1702, Santiago 8370854, Chile

<sup>2</sup> Programa Institucional de Fomento a la Investigación, Desarrollo e Innovación (PIDi), Universidad Tecnológica Metropolitana, Ignacio Valdivieso 2409, San Joaquín, Santiago 8940577, Chile;

dcortes@utem.cl (D.C.-A.); rodrigo.araya@utem.cl (R.A.-H.)

\* Correspondence: daniela.ortega@ubo.cl

**Table S1.** Calculated complexation energies and adsorption Gibbs free energies at 298K (in eV)

| Complex                                              | $\Delta E_{\text{com}}$ | $\Delta G_{\text{ads}}$ |
|------------------------------------------------------|-------------------------|-------------------------|
| <b>[Cu(H<sub>2</sub>O)<sub>5</sub>]<sup>2+</sup></b> |                         |                         |
| <b>A2P-Cu(II)</b>                                    | -0.69                   | -0.67                   |
| <b>BA-Cu(II)</b>                                     | -1.18                   | -2.39                   |
| <b>DAP-Cu(II)</b>                                    | -1.70                   | -1.61                   |
| <b>HAMC-Cu(II)</b>                                   | -0.97                   | -0.83                   |
| <b>PAMBA-Cu(II)</b>                                  | -1.19                   | -1.09                   |

## Cartesian coordinates of the optimized structures

### A2P

|   |                 |                 |                |
|---|-----------------|-----------------|----------------|
| C | 8.062926838881  | 3.486328781777  | 1.230438434728 |
| C | 9.285023691926  | 4.161992837444  | 1.111074422960 |
| C | 9.972396047149  | 4.005518602416  | 2.358938113840 |
| C | 9.172322457761  | 3.246104992982  | 3.212435649398 |
| N | 8.001902900150  | 2.935194745003  | 2.517435259652 |
| H | 10.957019762163 | 4.423580645538  | 2.620548180852 |
| C | 9.430340668478  | 2.834276306658  | 4.632895740022 |
| H | 9.510891713380  | 1.730319820453  | 4.771950635933 |
| H | 10.391854144208 | 3.274974412862  | 4.971537195540 |
| H | 8.641474481461  | 3.194746293450  | 5.335831787902 |
| C | 7.006497265783  | 1.953174879131  | 2.951803737287 |
| H | 7.057968422969  | 1.878534909217  | 4.060844092650 |
| H | 5.985053030905  | 2.330597661536  | 2.714422807009 |
| C | 7.192526216856  | 0.559350859459  | 2.308180533047 |
| H | 6.350192392631  | -0.092019696051 | 2.645635917904 |
| H | 7.061950712610  | 0.667644837255  | 1.206939532110 |

|   |                  |                 |                 |
|---|------------------|-----------------|-----------------|
| C | 8.542459147367   | -0.111119523084 | 2.619281700771  |
| H | 9.367205702816   | 0.611522947019  | 2.409301574167  |
| H | 8.596716813792   | -0.330391633913 | 3.712898285048  |
| C | 8.821374735565   | -1.409530180516 | 1.835189318412  |
| H | 9.740411648368   | -1.884070485269 | 2.255895429544  |
| H | 7.998268471458   | -2.146297999092 | 2.011537273457  |
| C | 9.019655608450   | -1.211045622286 | 0.320264992587  |
| H | 8.065869725738   | -0.894317753490 | -0.165332042951 |
| H | 9.736612180333   | -0.373422857526 | 0.142036150273  |
| C | 9.538970500285   | -2.484461039286 | -0.376910509727 |
| H | 8.865715685874   | -3.342781318685 | -0.153077219281 |
| H | 10.533623366857  | -2.779310610855 | 0.024784779471  |
| C | 6.904817374430   | 3.464694750970  | 0.269291665945  |
| H | 6.172477161098   | 2.670006364539  | 0.532869837911  |
| H | 7.261543533351   | 3.205744064343  | -0.756141602314 |
| C | 6.157143166962   | 4.836449719019  | 0.192159311172  |
| H | 5.936143536910   | 5.194475017041  | 1.222576421828  |
| H | 6.851125770856   | 5.592631779020  | -0.238715388834 |
| C | 1.287231173217   | 4.059141179118  | -1.019655691728 |
| H | 0.895510460076   | 4.402515063502  | -0.035770772555 |
| H | 0.674356396875   | 4.586932303244  | -1.786457908385 |
| C | 1.008589709632   | 2.530300745754  | -1.133838399304 |
| H | 1.721099969324   | 1.980506443510  | -0.469768938179 |
| H | 1.206540942605   | 2.167160288078  | -2.167504834186 |
| C | -0.391046472296  | 2.150186325522  | -0.672268694055 |
| C | -1.230206105753  | 1.249214283291  | -1.565854501253 |
| H | -2.013659337320  | 0.755032160049  | -0.952898804113 |
| H | -0.601318740487  | 0.460117402989  | -2.037785184749 |
| C | -1.922720686593  | 2.085228384547  | -2.702204923626 |
| H | -2.403337900649  | 2.973718866795  | -2.237179015903 |
| H | -1.142786766916  | 2.483320872992  | -3.390647040210 |
| O | -0.840704211690  | 2.621170652372  | 0.381006540063  |
| C | -6.087443495207  | -0.657965574232 | -3.701216372623 |
| H | -5.910680623483  | -1.759622797992 | -3.752094880109 |
| H | -6.421075585381  | -0.472097237090 | -2.658721087410 |
| C | -7.259730109066  | -0.333600290333 | -4.675897305178 |
| H | -6.931092728585  | -0.560559388149 | -5.714697389259 |
| H | -7.464183603109  | 0.760597086962  | -4.652422690430 |
| C | -8.525024880863  | -1.112780110636 | -4.432267146887 |
| C | -9.017570831851  | -2.199878480028 | -5.155978907045 |
| N | -9.457557544910  | -0.822071569836 | -3.430632194473 |
| C | -10.282417988284 | -2.578602789374 | -4.605317257198 |
| H | -8.515301716611  | -2.661096415461 | -6.020812296594 |
| C | -10.541028660129 | -1.703672917682 | -3.540501313574 |
| C | -11.743369772299 | -1.674544200120 | -2.633685631877 |
| H | -12.664962976081 | -1.787332574543 | -3.252408519059 |
| H | -11.853248993039 | -0.686401970927 | -2.134932803751 |
| C | -11.749974921072 | -2.776113673091 | -1.543268285173 |
| H | -12.134372122296 | -3.746174771212 | -1.937386035442 |
| H | -10.700143226297 | -3.009781027930 | -1.230921861799 |
| C | -12.478339520103 | -2.410724426292 | -0.243165734505 |
| C | -12.867348430778 | -3.577832341652 | 0.658284626915  |
| H | -13.177593872447 | -3.210025337971 | 1.658290393716  |
| H | -13.716407970456 | -4.136079500818 | 0.198522574483  |
| H | -12.031266408263 | -4.306927221661 | 0.760019703752  |
| O | -12.698100164398 | -1.247897248608 | 0.077489046208  |

|   |                 |                 |                 |
|---|-----------------|-----------------|-----------------|
| N | 9.652960803903  | -2.355785048157 | -1.831095138545 |
| C | 10.760893677803 | -1.835024988133 | -2.507021557068 |
| C | 8.632702155745  | -2.620764444401 | -2.744677796780 |
| C | 10.444203224240 | -1.781048587178 | -3.873547093442 |
| C | 9.110288181182  | -2.278425483684 | -4.012123322665 |
| H | 8.550847346273  | -2.376509810213 | -4.955555421180 |
| C | 12.051553898093 | -1.424903440246 | -1.841598224013 |
| H | 12.340551363770 | -0.414317612397 | -2.216817052289 |
| H | 11.924737577121 | -1.307917702698 | -0.743013165193 |
| C | 13.238385359585 | -2.379269381294 | -2.108184442960 |
| H | 13.368546570949 | -2.560390916328 | -3.200575522745 |
| H | 14.196628814370 | -1.897839901788 | -1.781647792104 |
| C | 13.186017033281 | -3.720423069569 | -1.368210109615 |
| C | 14.009278760721 | -4.850037801455 | -1.976662643262 |
| H | 14.100032014742 | -5.694655391477 | -1.263105195043 |
| H | 13.497223617640 | -5.211072092980 | -2.899818180383 |
| H | 15.018593227209 | -4.500747725331 | -2.291963222362 |
| O | 12.540982843306 | -3.879440490451 | -0.338445361704 |
| C | 7.280492985718  | -3.164282224709 | -2.361829779701 |
| H | 7.170975145919  | -3.201990719550 | -1.255137405765 |
| H | 7.167594609761  | -4.223879163420 | -2.698560534093 |
| C | 6.092406922804  | -2.339315920291 | -2.943985034828 |
| H | 6.257701268506  | -1.264254144275 | -2.709547921176 |
| H | 6.118424972411  | -2.401080904587 | -4.055661237473 |
| C | 4.749288420213  | -2.819192674140 | -2.466740742118 |
| C | 3.947123638265  | -3.842847787310 | -2.994786616286 |
| N | 4.180479167493  | -2.410640584707 | -1.255371375747 |
| C | 2.870172075218  | -4.048816000060 | -2.074285463808 |
| C | 3.028048380705  | -3.164931499709 | -1.006057339149 |
| H | 2.059114959634  | -4.787490829741 | -2.171645169741 |
| C | 4.635347789629  | -1.302275022031 | -0.420927480559 |
| H | 4.427129971806  | -1.554503798031 | 0.642646560020  |
| H | 5.741840187260  | -1.210621785362 | -0.496495056503 |
| C | 2.178332611653  | -2.987561531904 | 0.219938359221  |
| H | 1.744026779713  | -3.975445385152 | 0.491704037684  |
| H | 2.819052924674  | -2.696287858091 | 1.084634625278  |
| C | 1.003981871511  | -1.946846310482 | 0.087650750820  |
| H | 1.282262243103  | -1.176670963899 | -0.665953773698 |
| H | 0.090237490010  | -2.455458618272 | -0.291148767504 |
| C | 0.735805329158  | -1.214823817364 | 1.401978463325  |
| C | -0.494334843155 | -1.627091467763 | 2.193602211990  |
| C | -0.775636408861 | -0.808877024224 | 3.473806191789  |
| H | -0.697486958035 | 0.274770951619  | 3.229725902259  |
| H | 0.050394300412  | -0.994265722845 | 4.199123533221  |
| C | -2.095544226312 | -1.137197728234 | 4.121959751876  |
| C | -2.423850028476 | -2.243679426268 | 4.915581086515  |
| N | -3.253167265709 | -0.361207896118 | 3.968537124913  |
| C | -3.814343103749 | -2.127030094389 | 5.241589179195  |
| C | -4.312445866302 | -0.963687310503 | 4.651534847697  |
| H | -4.388755733962 | -2.826495002640 | 5.866716297683  |
| C | -3.346517642624 | 0.873402144588  | 3.195073095418  |
| H | -2.477018640319 | 1.529417163567  | 3.433485906086  |
| H | -4.251470713204 | 1.435599267024  | 3.513568327327  |
| H | -1.367399966603 | -1.602771246124 | 1.495707896055  |
| H | -0.385706735794 | -2.716779570788 | 2.427941688514  |
| O | 1.510016594082  | -0.345117130044 | 1.814432880152  |

|   |                  |                 |                 |
|---|------------------|-----------------|-----------------|
| C | -5.696224800882  | -0.366413199499 | 4.714051978057  |
| H | -5.686279544492  | 0.608358489201  | 5.263378946437  |
| H | -6.061771041714  | -0.115030166699 | 3.690657446858  |
| C | -6.737807853696  | -1.294118671536 | 5.390851505330  |
| H | -6.422087323867  | -1.472026922186 | 6.445325209066  |
| H | -6.696903476392  | -2.295853918009 | 4.902063102203  |
| C | -8.145633430348  | -0.762555067945 | 5.405942646586  |
| C | -8.751569615006  | 0.079040635033  | 6.349580913829  |
| N | -9.105087076191  | -1.065240505073 | 4.428994327627  |
| C | -10.105344221210 | 0.279213432036  | 5.924473416780  |
| C | -10.308161300601 | -0.433116949917 | 4.743000903234  |
| H | -10.872635450160 | 0.873510007885  | 6.444597988845  |
| C | -11.565256900874 | -0.615927114773 | 3.942556141941  |
| H | -11.937264098020 | -1.669966283517 | 3.963556368811  |
| H | -12.370550050331 | 0.016540884421  | 4.371947475545  |
| H | -11.470427053434 | -0.336305269016 | 2.866991739169  |
| C | -8.891036688679  | -1.852473152989 | 3.219905968363  |
| H | -8.069623676420  | -2.580962635291 | 3.406949230080  |
| H | -9.803204703989  | -2.467128550446 | 3.032570903922  |
| C | -8.575407392293  | -1.014576117609 | 1.962294364721  |
| H | -9.387334480497  | -0.264401608477 | 1.820537742322  |
| H | -7.642477383965  | -0.427353895985 | 2.133123509225  |
| C | -8.428762224513  | -1.887278312885 | 0.704834453689  |
| H | -9.354077826186  | -2.505591635858 | 0.589948787937  |
| H | -7.601222411132  | -2.621912026833 | 0.858971310349  |
| C | -8.178004408226  | -1.124267127494 | -0.613225779877 |
| H | -8.077212708468  | -1.875310547209 | -1.431943448690 |
| H | -7.190703245968  | -0.605412582584 | -0.554118463908 |
| C | -9.282484837621  | -0.113362201195 | -0.984015140595 |
| H | -10.271082427366 | -0.509297833810 | -0.659504176899 |
| H | -9.155554015848  | 0.831868747873  | -0.405026613080 |
| C | -9.360747318737  | 0.290743051968  | -2.477013382245 |
| H | -10.240395410715 | 0.964731476985  | -2.613663438307 |
| H | -8.475802689659  | 0.901304745271  | -2.759642878316 |
| C | -3.406730086743  | 0.682785876238  | 1.650466771909  |
| H | -2.457798094275  | 0.175440089569  | 1.335598760662  |
| C | 3.956804268351   | 0.079628341199  | -0.725142691548 |
| H | 2.934936436069   | -0.148236076991 | -1.130780584899 |
| C | 4.695810110324   | 0.904354908117  | -1.780854822457 |
| H | 4.202700097472   | 1.890305091032  | -1.929212611713 |
| H | 4.707678633000   | 0.373228058477  | -2.757401834440 |
| C | 4.908914009918   | 4.815578079881  | -0.649025498736 |
| C | 2.725466571575   | 4.443221241623  | -1.209908510560 |
| C | 3.398736207219   | 4.817491584005  | -2.382752496737 |
| H | 5.576631395547   | 5.362555526426  | -2.694096242224 |
| C | 4.764598639059   | 5.051235342202  | -2.018732335709 |
| N | 3.655604758617   | 4.428745310449  | -0.164691579250 |
| C | 3.328397396477   | 4.199890374146  | 1.241544561189  |
| H | 4.229290046694   | 3.797937159787  | 1.754864604125  |
| H | 2.553464433287   | 3.405561413213  | 1.314760780038  |
| C | 2.843944768044   | 5.478097212744  | 1.977940612511  |
| H | 1.881037005996   | 5.805309197337  | 1.496035633348  |
| C | 2.570370055029   | 5.187239926824  | 3.455139571976  |
| H | 2.232456686976   | 6.110291837025  | 3.973543687974  |
| H | 1.780589545020   | 4.412513889908  | 3.570901956874  |
| C | -2.900243370159  | 1.274755467226  | -3.506895328593 |

|   |                  |                 |                 |
|---|------------------|-----------------|-----------------|
| C | -4.771789524768  | 0.037917702359  | -3.951378617885 |
| C | -3.813938344185  | -0.274417792079 | -4.931125755466 |
| H | -1.695915450828  | 0.477219314521  | -5.194423730241 |
| C | -2.649530131635  | 0.503089903764  | -4.643761341877 |
| N | -4.206432104704  | 0.996125293265  | -3.090764434443 |
| C | -4.930616602135  | 1.718462680736  | -2.040756433845 |
| H | -5.704436774385  | 1.035574066286  | -1.628545876118 |
| H | -4.253744423804  | 1.945630787859  | -1.186808935201 |
| C | -5.652825185972  | 3.014916288827  | -2.510660037717 |
| H | -6.260695545206  | 3.345757697648  | -1.633213044786 |
| C | -4.723656588997  | 4.170948472097  | -2.911767586644 |
| H | -4.065643910969  | 3.889823203029  | -3.766581052928 |
| H | -5.332472810850  | 5.047064929297  | -3.223976926627 |
| H | -4.075530862219  | 4.489199881226  | -2.064353905983 |
| H | 3.493887129634   | 4.828954278896  | 3.964185153996  |
| H | 5.749516481323   | 1.097455936927  | -1.477665230654 |
| C | -4.581944657821  | -0.187735492882 | 1.195630653358  |
| H | -5.540289625966  | 0.360270031752  | 1.339385174474  |
| H | -4.494334498251  | -0.441000089419 | 0.116326984540  |
| H | -4.628699252809  | -1.139677184301 | 1.768667152309  |
| O | -6.607188154919  | 2.748176888999  | -3.544156263539 |
| H | -6.102339545947  | 2.432357881050  | -4.326241454158 |
| O | 3.807275994211   | 6.529793210877  | 1.912528429054  |
| H | 3.979696256733   | 6.711019628229  | 0.963009171725  |
| O | 3.854792416352   | 0.854683978043  | 0.472339161828  |
| H | 3.148114654542   | 0.439310564362  | 1.030047996061  |
| O | -3.503969035614  | 1.964429637963  | 1.031233817796  |
| H | -2.578948396839  | 2.308324628081  | 0.904334961438  |
| C | 9.764952981323   | 4.944624508254  | -0.082947213675 |
| H | 9.301112114726   | 4.589376411170  | -1.030741899964 |
| H | 9.537740531231   | 6.034920072533  | 0.000264277471  |
| H | 10.868396132989  | 4.859183226219  | -0.204572836328 |
| C | 2.811224852043   | 4.934958143572  | -3.764299759304 |
| H | 3.032592121167   | 4.041352232576  | -4.395783911181 |
| H | 1.704096444810   | 5.049647009242  | -3.743848038310 |
| H | 3.222893310979   | 5.815943078181  | -4.306390420541 |
| C | -3.971867415096  | -1.276340291913 | -6.044536474110 |
| H | -4.568655795864  | -2.162594212351 | -5.728343768940 |
| H | -4.487001530555  | -0.847100894599 | -6.936740816250 |
| H | -2.983847319114  | -1.649885806097 | -6.392787493225 |
| C | -11.167943228704 | -3.701999285119 | -5.076862930017 |
| H | -10.923808677348 | -4.675131126348 | -4.585975059541 |
| H | -12.244968992887 | -3.501643352417 | -4.874676864909 |
| H | -11.065300438737 | -3.864526778848 | -6.173080071640 |
| C | 11.336917120841  | -1.296721451443 | -4.986125213671 |
| H | 11.956628537573  | -2.113303529423 | -5.430561445220 |
| H | 10.740025158452  | -0.864500944267 | -5.820041727280 |
| H | 12.044630405244  | -0.506073539755 | -4.646546629769 |
| C | 4.201610551015   | -4.621272962795 | -4.258875179653 |
| H | 4.796664242572   | -4.038910207355 | -4.997304135123 |
| H | 4.762079253316   | -5.567751357427 | -4.068537073521 |
| H | 3.248057194330   | -4.908246716665 | -4.755988481706 |
| C | -1.498024504325  | -3.355344294839 | 5.334886365277  |
| H | -1.550697523145  | -4.237570784588 | 4.651573954151  |
| H | -0.433500787818  | -3.029264588081 | 5.360581925447  |
| H | -1.749425862176  | -3.729023638140 | 6.352745296273  |

|   |                 |                |                |
|---|-----------------|----------------|----------------|
| C | -8.102097525830 | 0.668328895911 | 7.574156647609 |
| H | -7.238407384544 | 0.059814750515 | 7.925489652428 |
| H | -7.715484636889 | 1.700484686624 | 7.395470424240 |
| H | -8.821256618867 | 0.739517799825 | 8.420966949415 |

## BA

|   |                 |                 |                 |
|---|-----------------|-----------------|-----------------|
| C | 6.953705908784  | 4.137828299301  | -0.248894028497 |
| C | 7.066014114067  | 4.968372185013  | -1.373725436848 |
| C | 8.460868092047  | 5.055187229387  | -1.690899378979 |
| C | 9.172386767857  | 4.292503798549  | -0.765514027387 |
| N | 8.244781320485  | 3.740945467671  | 0.117974497680  |
| H | 8.908161527370  | 5.635514490574  | -2.512815701438 |
| C | 10.651470706076 | 4.070910228682  | -0.645666789008 |
| H | 11.070539301462 | 4.440839257412  | 0.321395049465  |
| H | 10.946858413492 | 2.998105148847  | -0.737028942293 |
| H | 11.173170409456 | 4.621527832287  | -1.456615482046 |
| C | 8.584450105299  | 2.786572700817  | 1.169935631362  |
| H | 9.589089495723  | 3.055668612327  | 1.570229171787  |
| H | 7.878171955879  | 2.917829575263  | 2.020338778844  |
| C | 8.594062211846  | 1.313530094188  | 0.711649959705  |
| H | 7.556458926577  | 1.000751312578  | 0.443753695293  |
| H | 9.185235874377  | 1.238733369711  | -0.230525540970 |
| C | 9.169451342920  | 0.369718001653  | 1.781497449534  |
| H | 10.230368032949 | 0.658503345892  | 1.986379700846  |
| H | 8.626153830911  | 0.526420794703  | 2.745024284503  |
| C | 9.117623295257  | -1.128270603337 | 1.421112123033  |
| H | 9.578457412271  | -1.708644915649 | 2.256296671851  |
| H | 8.052000814485  | -1.464723530852 | 1.376404990243  |
| C | 9.818214001506  | -1.498129485239 | 0.099678629742  |
| H | 9.233077894100  | -1.119883264598 | -0.771820491007 |
| H | 10.809715990664 | -0.986612152928 | 0.039468077347  |
| C | 10.017183818385 | -3.020814719363 | -0.051125737535 |
| H | 9.064486190479  | -3.545585391318 | 0.183244064593  |
| H | 10.758431360209 | -3.395767356384 | 0.689879278647  |
| C | 5.703147998837  | 3.711550370076  | 0.471688116092  |
| H | 5.664694078491  | 2.598248551929  | 0.539718288653  |
| H | 4.845400550653  | 3.999350578308  | -0.176104337975 |
| C | 5.481573495877  | 4.326611528066  | 1.890075572892  |
| H | 6.077903220975  | 3.745888268833  | 2.639944853761  |
| H | 5.928953230752  | 5.345401230219  | 1.896522597029  |
| C | 0.612459875877  | 3.325856658386  | 3.198762084409  |
| H | 0.724701526897  | 2.242588964125  | 2.976640176126  |
| H | 0.322376900742  | 3.372620177758  | 4.276776048354  |
| C | -0.574853252198 | 3.882911197903  | 2.382050810225  |
| H | -0.727976643995 | 4.970911218528  | 2.582793050332  |
| H | -1.526352363120 | 3.404290942238  | 2.724612504309  |
| C | -0.483898976374 | 3.692657440859  | 0.868299325015  |
| C | -1.642572562480 | 4.234506986154  | 0.022374231738  |
| H | -1.438380008255 | 3.928631330854  | -1.026612815313 |
| H | -1.615397172014 | 5.351058707854  | 0.045577899265  |
| C | -3.038426846408 | 3.730553957019  | 0.474460904594  |
| H | -2.941791659396 | 2.683805692664  | 0.850969856876  |
| H | -3.379352408338 | 4.324140306225  | 1.359650764098  |
| O | 0.457654772829  | 3.109761879974  | 0.338910576337  |

|   |                  |                 |                 |
|---|------------------|-----------------|-----------------|
| C | -7.299974177064  | 2.548291012756  | -2.035594883005 |
| H | -7.389959088904  | 2.424867119278  | -3.139238584501 |
| H | -7.346958071513  | 1.515280064143  | -1.623568150075 |
| C | -8.540536208362  | 3.368095873904  | -1.552669950590 |
| H | -8.387542461416  | 4.422937058261  | -1.875468938627 |
| H | -8.547002263629  | 3.407572029508  | -0.438478599312 |
| C | -9.872519858884  | 2.924233609692  | -2.099327843819 |
| C | -10.453763650154 | 3.321790885927  | -3.305165187441 |
| N | -10.774515430679 | 2.059062972246  | -1.470156975848 |
| C | -11.741107203559 | 2.712537774129  | -3.416137945569 |
| H | -9.996002802125  | 4.016335988572  | -4.026943370194 |
| C | -11.923899911062 | 1.931710715131  | -2.262571884793 |
| C | -13.147527749087 | 1.143084578205  | -1.865280881842 |
| H | -14.024052381520 | 1.834511034255  | -1.806540445369 |
| H | -13.039093188702 | 0.722575713774  | -0.841905802280 |
| C | -13.563917853434 | -0.013287967633 | -2.832181773048 |
| H | -14.479172259761 | -0.496214267872 | -2.421379242019 |
| H | -13.818248711668 | 0.413261352665  | -3.828010084342 |
| C | -12.492296412595 | -1.100865340968 | -2.976185492170 |
| C | -11.529651472669 | -0.961341257420 | -4.145031346814 |
| H | -10.772505345505 | -1.772214256912 | -4.136167728890 |
| H | -12.086820755592 | -0.980081243848 | -5.110511119395 |
| H | -11.029662464128 | 0.035414649321  | -4.095779979813 |
| O | -12.409731729096 | -2.013781302686 | -2.159109421739 |
| N | 10.445186691578  | -3.435318607496 | -1.387098652206 |
| C | 11.758232144799  | -3.371556425448 | -1.864293751175 |
| C | 9.597413347533   | -3.860796441260 | -2.411822152756 |
| C | 11.745370268835  | -3.762585999069 | -3.212806342622 |
| C | 10.388838630707  | -4.071290263131 | -3.543504889127 |
| H | 10.019064859567  | -4.421714232555 | -4.520005241734 |
| C | 12.952361993993  | -2.988715320196 | -1.024440130782 |
| H | 13.550989599810  | -2.224643564443 | -1.575598380096 |
| H | 12.642478602079  | -2.499210633180 | -0.075203316695 |
| C | 13.893390090643  | -4.167852885528 | -0.686363259836 |
| H | 14.180771889204  | -4.726977892887 | -1.606840259737 |
| H | 14.860440021540  | -3.779662133552 | -0.272978347447 |
| C | 13.365767169823  | -5.148107931701 | 0.367579847406  |
| C | 13.977258201928  | -6.543998975070 | 0.344503215411  |
| H | 13.717825744003  | -7.099526016215 | 1.269086750011  |
| H | 13.572457297430  | -7.098746286768 | -0.534831227892 |
| H | 15.082422329273  | -6.507268165912 | 0.212798230758  |
| O | 12.519165227845  | -4.831216268504 | 1.195045501722  |
| C | 8.106628875225   | -4.016946240579 | -2.276465521016 |
| H | 7.799421602031   | -4.055641612844 | -1.207246237528 |
| H | 7.807374122505   | -5.004566906938 | -2.697665645177 |
| C | 7.264647927401   | -2.913839362368 | -2.996975754402 |
| H | 7.623851980460   | -1.910081380837 | -2.678039512868 |
| H | 7.489258850499   | -2.960718120595 | -4.088156419707 |
| C | 5.784391675130   | -3.075910828066 | -2.783639685095 |
| C | 4.934062133986   | -4.023450919080 | -3.373437609809 |
| N | 5.053686195892   | -2.402896196069 | -1.793563560848 |
| C | 3.666036469354   | -3.911707515105 | -2.720664850890 |
| C | 3.752834878958   | -2.910800886917 | -1.751878216247 |
| H | 2.769788778335   | -4.516528934615 | -2.931478382810 |
| C | 5.524272157053   | -1.256374053971 | -1.013178852724 |
| H | 5.203957949275   | -1.390724707609 | 0.046669590261  |

|   |                  |                 |                 |
|---|------------------|-----------------|-----------------|
| H | 6.635474793254   | -1.282283778950 | -0.992842050308 |
| C | 2.675286650569   | -2.406358854317 | -0.826193123310 |
| H | 2.228711247174   | -3.264629343819 | -0.272327484542 |
| H | 3.092110466531   | -1.748721191314 | -0.031306604816 |
| C | 1.543877524028   | -1.651339134036 | -1.555641155868 |
| H | 1.957772206962   | -0.905489059696 | -2.278040599756 |
| H | 0.957955652925   | -2.349411246110 | -2.202983644414 |
| C | 0.559004879990   | -0.926519246859 | -0.639267599038 |
| C | -0.444024509010  | -0.013683506003 | -1.343533691179 |
| C | -1.618975491169  | 0.515510321156  | -0.491203740153 |
| H | -1.960696025571  | 1.455881566655  | -0.979852536385 |
| H | -1.212880377827  | 0.813500212681  | 0.499724125620  |
| C | -2.830964012551  | -0.367825731810 | -0.352085973261 |
| C | -3.869196437367  | -0.535052507310 | -1.283278283023 |
| N | -3.144507269517  | -1.128105475512 | 0.781290632064  |
| C | -4.826669554695  | -1.411286995877 | -0.683364955094 |
| C | -4.372793057115  | -1.760166389777 | 0.594076455370  |
| H | -5.763916333634  | -1.756178665487 | -1.148080107715 |
| C | -2.373004775113  | -1.132433155141 | 2.025840246404  |
| H | -1.297041353352  | -1.017603440348 | 1.769669355673  |
| H | -2.467224224708  | -2.136803775166 | 2.498410784863  |
| H | 0.167223168506   | 0.860271505364  | -1.685091829592 |
| H | -0.803010504082  | -0.501990223782 | -2.279666786337 |
| O | 0.622453141354   | -1.030069751204 | 0.583894051436  |
| C | -5.061347048666  | -2.625388980678 | 1.618291501009  |
| H | -4.473687210504  | -2.690934678680 | 2.560550218189  |
| H | -6.021590794633  | -2.143344765073 | 1.920724060104  |
| C | -5.378581378454  | -4.073399073142 | 1.120227254358  |
| H | -4.435626444095  | -4.668439877259 | 1.137337780650  |
| H | -5.663064852581  | -4.024462329266 | 0.045254891739  |
| C | -6.439728317066  | -4.779880934004 | 1.917410753513  |
| C | -6.332627988302  | -5.430063567485 | 3.154419912009  |
| N | -7.788232855756  | -4.811626791753 | 1.534542310724  |
| C | -7.651629662083  | -5.858524677299 | 3.517401751768  |
| C | -8.534614765051  | -5.468107895587 | 2.510635505489  |
| H | -7.933460615515  | -6.412142038806 | 4.426606234367  |
| C | -10.013179284354 | -5.694836344289 | 2.393307587961  |
| H | -10.289028262854 | -6.338026136478 | 1.522790669938  |
| H | -10.382042017746 | -6.209439518345 | 3.305591289258  |
| H | -10.594995890735 | -4.747766225045 | 2.291539059048  |
| C | -8.337534144532  | -4.233786589820 | 0.309968676533  |
| H | -7.603599342981  | -4.386259454829 | -0.515236719006 |
| H | -9.240219401723  | -4.816414371954 | 0.018073783030  |
| C | -8.688152607886  | -2.735141977116 | 0.415455503254  |
| H | -9.509506106799  | -2.605739756276 | 1.159492564780  |
| H | -7.809987601753  | -2.190686697305 | 0.834671353230  |
| C | -9.068383862796  | -2.113161708614 | -0.940257447671 |
| H | -10.016611421800 | -2.562277896316 | -1.322023486807 |
| H | -8.281525427052  | -2.380639448973 | -1.687878627845 |
| C | -9.206959169313  | -0.577441055989 | -0.918962816325 |
| H | -9.322460393176  | -0.213118609879 | -1.966574243749 |
| H | -8.250751828373  | -0.131921306516 | -0.548423921980 |
| C | -10.380598572954 | -0.052044758204 | -0.076297064247 |
| H | -11.311548733832 | -0.581480059030 | -0.380872211270 |
| H | -10.229288686934 | -0.308060513771 | 0.999625705768  |
| C | -10.595805188435 | 1.476994475975  | -0.134051338863 |



|   |                  |                 |                 |
|---|------------------|-----------------|-----------------|
| H | -11.475699291262 | 1.747616078274  | 0.497004582197  |
| H | -9.725301858580  | 1.989686436174  | 0.330430878381  |
| C | -2.808654212318  | -0.040330041714 | 3.022734206267  |
| H | -2.727688248006  | 0.956783838708  | 2.523520689002  |
| H | -3.891063901891  | -0.170166904087 | 3.265977366958  |
| C | -1.978960640248  | -0.034730986884 | 4.317759383825  |
| H | -2.066697494680  | -1.030702159962 | 4.816307022615  |
| H | -0.897584698378  | 0.074718995231  | 4.061921423825  |
| C | -2.393214805960  | 1.070688144777  | 5.300131458960  |
| H | -3.459326471665  | 0.967142024513  | 5.607379035487  |
| H | -1.775939410826  | 1.052344750119  | 6.225601753565  |
| H | -2.279529865470  | 2.082715368820  | 4.846394336147  |
| C | 5.026771368883   | 0.116921384730  | -1.523859332352 |
| H | 3.912883031835   | 0.110015770828  | -1.523228378232 |
| H | 5.315567219413   | 0.884772919055  | -0.765673014655 |
| C | 5.538523219599   | 0.551978841204  | -2.913684529010 |
| H | 4.865765026489   | 1.354642144152  | -3.297562789014 |
| H | 5.422703952541   | -0.298154256909 | -3.628550545401 |
| C | 6.984556632378   | 1.075349500159  | -2.929195005702 |
| H | 7.307775451002   | 1.336543362166  | -3.961144815819 |
| H | 7.091843402450   | 1.992941138684  | -2.306368211711 |
| H | 7.713683943571   | 0.324499282405  | -2.546181600474 |
| C | 4.062743891686   | 4.499529644779  | 2.377730021003  |
| C | 1.916830108872   | 4.059396814414  | 3.013324638486  |
| C | 2.199982033702   | 5.381228971728  | 3.389091750629  |
| H | 4.094911821154   | 6.589216459925  | 3.120190249677  |
| C | 3.541337370499   | 5.647751010335  | 2.977657682975  |
| N | 3.059619122449   | 3.526168591496  | 2.402413435226  |
| C | 3.182106254083   | 2.166595990250  | 1.861763293629  |
| H | 3.594298373280   | 2.232828574765  | 0.832334887330  |
| H | 2.159766165497   | 1.760120313923  | 1.719802949621  |
| C | 4.045501660623   | 1.210970093584  | 2.713691041639  |
| H | 4.255287016620   | 0.304781430084  | 2.092900007321  |
| H | 5.038473926811   | 1.682587620907  | 2.900823162072  |
| C | 3.417016536225   | 0.775749808944  | 4.054322545117  |
| H | 4.217055646175   | 0.353519478258  | 4.707074169801  |
| H | 3.044664657965   | 1.680711826503  | 4.592830543029  |
| C | 2.290374516240   | -0.260765993290 | 3.908004290266  |
| H | 1.829490059902   | -0.505196297142 | 4.891155072096  |
| H | 1.473927008094   | 0.087488031404  | 3.235741454180  |
| H | 2.668046969594   | -1.212422112917 | 3.469058402214  |
| C | -4.066670335695  | 3.755616233184  | -0.625885956078 |
| C | -5.974903431630  | 3.196693058345  | -1.746145606248 |
| C | -5.264507178424  | 4.101030359917  | -2.550688987081 |
| H | -3.281243326534  | 5.125988070435  | -2.194926892002 |
| C | -4.068733244017  | 4.443289423064  | -1.841655052177 |
| N | -5.237516007663  | 2.997636287122  | -0.573169325389 |
| C | -5.609609464797  | 2.119336016654  | 0.535553350508  |
| H | -6.279398678931  | 1.328790196464  | 0.135806435628  |
| H | -4.701600911018  | 1.570435424448  | 0.877278177695  |
| C | -6.265120600935  | 2.851961972184  | 1.726395483792  |
| H | -5.612216435301  | 3.703086924696  | 2.031092499017  |
| H | -7.223886028436  | 3.316939537978  | 1.391136288435  |
| C | -6.518167257236  | 1.950844797228  | 2.952289362267  |
| H | -5.544374836508  | 1.530483963472  | 3.302753455272  |
| H | -6.882512823479  | 2.590869361051  | 3.789979829509  |

|   |                  |                 |                 |
|---|------------------|-----------------|-----------------|
| C | -7.514783258435  | 0.803387652159  | 2.721739962716  |
| H | -7.162284255370  | 0.088414797455  | 1.944619879743  |
| H | -7.679910809659  | 0.215443069714  | 3.651687941274  |
| H | -8.508151114305  | 1.188204040905  | 2.393822697462  |
| C | 5.936807579953   | 5.625027879427  | -2.127037125293 |
| H | 5.427320710648   | 4.920807689685  | -2.828247043367 |
| H | 5.151093209403   | 6.032715813829  | -1.451712116718 |
| H | 6.310328155996   | 6.473363985040  | -2.741455073025 |
| C | 1.270748787477   | 6.340492314607  | 4.086973179116  |
| H | 0.653390029151   | 6.942691472983  | 3.376298160612  |
| H | 0.560687673735   | 5.819176238363  | 4.769273194688  |
| H | 1.839258744714   | 7.070352640180  | 4.705473294663  |
| C | -5.680534071519  | 4.624634219661  | -3.900329632589 |
| H | -6.289326877968  | 3.885734900692  | -4.469178138051 |
| H | -6.292954199644  | 5.555530663166  | -3.827476884727 |
| H | -4.794721507219  | 4.872414882577  | -4.526466603972 |
| C | -12.722596214723 | 2.907848046838  | -4.542947282930 |
| H | -12.521484611741 | 3.858852315244  | -5.083376850891 |
| H | -12.674774861648 | 2.092986857680  | -5.305548331616 |
| H | -13.776592296156 | 2.951785404103  | -4.184168147260 |
| C | 12.933406210064  | -3.857709864849 | -4.134517451665 |
| H | 13.405752697258  | -4.870269581306 | -4.128753111492 |
| H | 12.640485988438  | -3.653014657968 | -5.188487500027 |
| H | 13.733146191661  | -3.128763092153 | -3.869885857943 |
| C | 5.299429219713   | -5.007390163363 | -4.453618149299 |
| H | 6.115435590969   | -4.628776109773 | -5.109772090518 |
| H | 5.645365732894   | -5.985964155685 | -4.041469891424 |
| H | 4.427128950954   | -5.229011474319 | -5.108557288949 |
| C | -3.962445593925  | 0.106586256029  | -2.643767469190 |
| H | -4.996558228473  | 0.035629945774  | -3.046456927647 |
| H | -3.699669063272  | 1.189977167143  | -2.618465543002 |
| H | -3.290504147862  | -0.373684125011 | -3.394912810109 |
| C | -5.073361102560  | -5.625914799733 | 3.957195106568  |
| H | -4.158564016957  | -5.537935540929 | 3.328846928435  |
| H | -4.972765373418  | -4.879359481126 | 4.781787878432  |
| H | -5.046696012641  | -6.631333122287 | 4.435488349947  |

## **DAP**

|   |                 |                |                 |
|---|-----------------|----------------|-----------------|
| C | 8.573478826910  | 5.135513248026 | -0.083414627699 |
| C | 9.128067758132  | 6.281626613347 | -0.671519963855 |
| C | 10.516628236763 | 6.299396734333 | -0.319212500129 |
| C | 10.786755643002 | 5.183780713195 | 0.472182383243  |
| N | 9.593883341080  | 4.473043676217 | 0.612618771182  |
| H | 11.254394356201 | 7.065314005499 | -0.605059610745 |
| C | 12.079602502133 | 4.792505106409 | 1.126852222193  |
| H | 11.990861746177 | 4.694195558970 | 2.235620896510  |
| H | 12.503264482667 | 3.832180039912 | 0.749337032859  |
| H | 12.837846005406 | 5.580296021120 | 0.932151967026  |
| C | 9.455458332677  | 3.185294569466 | 1.297912780396  |
| H | 10.282905592107 | 3.107495910731 | 2.039101906870  |
| H | 8.514707579908  | 3.178085426633 | 1.893558258370  |
| C | 9.457110067226  | 1.936310220383 | 0.390094802041  |
| H | 9.262250624095  | 1.064244836192 | 1.061251999165  |
| H | 8.572263484649  | 1.983378814404 | -0.287057017006 |
| C | 10.739404716891 | 1.706156772251 | -0.432349136692 |
| H | 10.818514688695 | 2.482549238949 | -1.230854542006 |

|   |                  |                 |                 |
|---|------------------|-----------------|-----------------|
| H | 11.628491698412  | 1.857994261591  | 0.225528166239  |
| C | 10.851482422950  | 0.297411177382  | -1.052191624007 |
| H | 11.828412623213  | 0.209309162445  | -1.585854989809 |
| H | 10.898219894970  | -0.451556127626 | -0.221280964017 |
| C | 9.709228295879   | -0.102825751343 | -2.002489617551 |
| H | 8.730620333225   | 0.005050552508  | -1.484446672885 |
| H | 9.664470127474   | 0.599387917419  | -2.869265630511 |
| C | 9.838736528375   | -1.563298649558 | -2.497300330795 |
| H | 10.239152633312  | -2.193489778685 | -1.671801503456 |
| H | 10.575727773128  | -1.647171733003 | -3.326996650869 |
| C | 7.132400850919   | 4.707853617646  | -0.049744032512 |
| H | 7.029844517172   | 3.613834841255  | -0.243592229489 |
| H | 6.601754667028   | 5.203151139956  | -0.893393331106 |
| C | 6.388695799836   | 5.086944958211  | 1.274015317006  |
| H | 6.853236078479   | 4.536115691425  | 2.126860041331  |
| H | 6.587111329088   | 6.162801143940  | 1.476915842266  |
| C | 1.870922354401   | 2.734256026080  | 1.224272872368  |
| H | 2.226626789759   | 1.839043381397  | 1.779802159120  |
| H | 0.955432289532   | 3.075439207972  | 1.762921714971  |
| C | 1.462415838919   | 2.289457314668  | -0.222665967922 |
| H | 2.338522548890   | 1.839294059478  | -0.740207767636 |
| H | 1.140287610961   | 3.189089887948  | -0.795213166874 |
| C | 0.336185306727   | 1.264061134632  | -0.152772613940 |
| C | -1.077436196929  | 1.837288493696  | -0.037691743625 |
| H | -1.353268941457  | 2.224498025661  | -1.051312619863 |
| H | -1.031568980865  | 2.754906645686  | 0.597386551589  |
| C | -2.145362284145  | 0.863653138967  | 0.517611953805  |
| H | -2.436530942529  | 0.109219480629  | -0.248596731051 |
| H | -1.675089361136  | 0.274423163055  | 1.334376705861  |
| O | 0.564399328794   | 0.055228443557  | -0.114893669603 |
| C | -6.450817087783  | 3.585294315589  | 0.788791977791  |
| H | -6.440850783911  | 4.590402666586  | 1.274044662444  |
| H | -6.398982559904  | 3.788010935134  | -0.304667743342 |
| C | -7.799118852861  | 2.892970792140  | 1.109652743208  |
| H | -7.903793813170  | 2.824777122617  | 2.222252033023  |
| H | -7.736672918347  | 1.835275347335  | 0.760687073702  |
| C | -8.989636237315  | 3.585380139959  | 0.498258070543  |
| C | -9.082699006635  | 4.844034520634  | -0.099364130324 |
| N | -10.267881530261 | 3.025797763366  | 0.485632892219  |
| C | -10.444830173215 | 5.061051828058  | -0.487977805654 |
| H | -8.253779879190  | 5.555122294869  | -0.232029018686 |
| C | -11.163418077907 | 3.916741958460  | -0.116883954555 |
| C | -12.619736853226 | 3.607418240023  | -0.336127709189 |
| H | -13.230463171215 | 4.498715531406  | -0.056734846669 |
| H | -12.976096558149 | 2.798639356109  | 0.339890705134  |
| C | -12.969585233588 | 3.214847845931  | -1.789124719631 |
| H | -12.848116992615 | 4.078946026823  | -2.484888015710 |
| H | -12.244561658775 | 2.452629679388  | -2.172922561804 |
| C | -14.365463623084 | 2.601967115795  | -1.960805684385 |
| C | -14.896562307143 | 2.535397377545  | -3.390648900431 |
| H | -15.798704436595 | 1.891452345898  | -3.439380094934 |
| H | -15.168958897256 | 3.561796848244  | -3.732019853679 |
| H | -14.120909963079 | 2.164311132666  | -4.098406601189 |
| O | -15.009523963598 | 2.177586639826  | -1.010195062877 |
| N | 8.576727525696   | -2.168469441913 | -2.931088004776 |
| C | 7.967523041868   | -1.973258500646 | -4.172850214555 |

|   |                 |                 |                 |
|---|-----------------|-----------------|-----------------|
| C | 7.752706636155  | -2.962145875765 | -2.128806981963 |
| C | 6.738490238837  | -2.655456957353 | -4.162305746841 |
| C | 6.618322893965  | -3.276430530096 | -2.879194102256 |
| H | 5.771352946110  | -3.880398701520 | -2.519216552331 |
| C | 8.589284896387  | -1.196307399256 | -5.307201869179 |
| H | 7.841139766549  | -0.466108675106 | -5.698194379778 |
| H | 9.448314501562  | -0.584874669536 | -4.953867759647 |
| C | 9.056516045789  | -2.071403233958 | -6.492721273586 |
| H | 8.235671124990  | -2.737174956027 | -6.847120813183 |
| H | 9.300858637546  | -1.423658968399 | -7.374250328421 |
| C | 10.317567672019 | -2.904790305855 | -6.237133486371 |
| C | 10.507383317244 | -4.119027018513 | -7.139233239271 |
| H | 11.538033640843 | -4.518365932286 | -7.044018074607 |
| H | 9.783887602030  | -4.911159952314 | -6.832864704559 |
| H | 10.282366368112 | -3.880631855808 | -8.203483931948 |
| O | 11.138141884429 | -2.610306518969 | -5.376171152921 |
| C | 8.065082915416  | -3.317349466567 | -0.702815386759 |
| H | 9.138940580163  | -3.606623804496 | -0.594344717017 |
| H | 7.483384324976  | -4.232364691642 | -0.448483519048 |
| C | 7.749169825089  | -2.211927815853 | 0.363381237052  |
| H | 8.272555065541  | -2.492145619316 | 1.305832862635  |
| H | 8.222701260594  | -1.255074466572 | 0.051825251148  |
| C | 6.288569300705  | -1.952333916812 | 0.609730770901  |
| C | 5.410617441566  | -1.106734772834 | -0.089415703733 |
| N | 5.529232969364  | -2.665200194035 | 1.552486871280  |
| C | 4.101571029066  | -1.321142441294 | 0.451974170492  |
| C | 4.190305530715  | -2.278217345008 | 1.466378018675  |
| H | 3.173637973781  | -0.833676192040 | 0.112861906102  |
| C | 6.060730878566  | -3.549603686427 | 2.591306970575  |
| H | 5.343411832932  | -4.388500949635 | 2.730797146336  |
| H | 6.996077796995  | -4.020472391710 | 2.215296705774  |
| C | 3.100353180408  | -2.826756220008 | 2.352754268712  |
| H | 3.399344116317  | -3.800528750279 | 2.803763764872  |
| H | 2.917529646011  | -2.160781692298 | 3.232501461478  |
| C | 1.776502135660  | -3.027963030077 | 1.598360503103  |
| H | 1.412392415683  | -2.063607498676 | 1.167713732938  |
| H | 1.929486251318  | -3.678815646135 | 0.703157220220  |
| C | 0.648210923105  | -3.622043163643 | 2.444323408851  |
| C | -0.659332436366 | -3.918493720641 | 1.701181361001  |
| C | -1.453273779374 | -2.618371443756 | 1.353104284137  |
| H | -0.775268903862 | -1.906835086763 | 0.831324733400  |
| H | -1.739009738474 | -2.115599830916 | 2.305925940102  |
| C | -2.637509370510 | -2.851760729820 | 0.458013225101  |
| C | -2.645666472203 | -2.952168607752 | -0.940762974856 |
| N | -3.919409284858 | -3.174733490468 | 0.919438979689  |
| C | -3.969846285736 | -3.350239463615 | -1.319926377566 |
| C | -4.742849975295 | -3.481092577847 | -0.162680386480 |
| H | -4.315064487871 | -3.539778431740 | -2.347165259366 |
| C | -4.343673165862 | -3.067610321055 | 2.311522631853  |
| H | -3.580561999326 | -3.556376965555 | 2.960857313932  |
| H | -5.276935017572 | -3.661373845874 | 2.443181433010  |
| H | -0.435795909434 | -4.456073066362 | 0.750493492460  |
| H | -1.274477668195 | -4.590976113344 | 2.339643782738  |
| O | 0.770184370025  | -3.829263666976 | 3.647216821186  |
| C | -6.183432809516 | -3.892463648132 | -0.014268583152 |
| H | -6.283793578784 | -4.646518354309 | 0.803786711828  |

|   |                  |                 |                 |
|---|------------------|-----------------|-----------------|
| H | -6.809957576492  | -3.022817004471 | 0.300842850248  |
| C | -6.774262789885  | -4.507167615626 | -1.310326166168 |
| H | -6.067505694518  | -5.291639221960 | -1.672534611264 |
| H | -6.784452728569  | -3.726318392413 | -2.104402540666 |
| C | -8.135766645001  | -5.127029736874 | -1.138404479385 |
| C | -8.464857491093  | -6.334332610494 | -0.504314046732 |
| N | -9.324682937826  | -4.553252871969 | -1.601598272936 |
| C | -9.888481384260  | -6.473647248118 | -0.582307488782 |
| C | -10.402851787091 | -5.367227979860 | -1.257845408424 |
| H | -10.486297262221 | -7.312199102164 | -0.192297250054 |
| C | -11.824038103548 | -5.041759297836 | -1.612838026082 |
| H | -11.998901772730 | -4.985446201771 | -2.714697604151 |
| H | -12.492443221481 | -5.836933230517 | -1.220150580966 |
| H | -12.176360666980 | -4.074947073601 | -1.179248586442 |
| C | -9.444987483283  | -3.265623325091 | -2.279129952403 |
| H | -8.620045723168  | -3.163103873869 | -3.022764126270 |
| H | -10.386452030327 | -3.275625555755 | -2.873513455502 |
| C | -9.440692345041  | -2.063095037213 | -1.318259893868 |
| H | -10.200316391769 | -2.247077604988 | -0.521693978782 |
| H | -8.449754483804  | -2.009199660146 | -0.808983624853 |
| C | -9.697664952270  | -0.718470860618 | -2.017495291348 |
| H | -10.693153369131 | -0.731709326195 | -2.528469211037 |
| H | -8.939733130376  | -0.585231406665 | -2.826031622560 |
| C | -9.611305442608  | 0.486209473368  | -1.060518181922 |
| H | -9.548208768058  | 1.430609239963  | -1.650582661538 |
| H | -8.644194545384  | 0.407835400144  | -0.508773577437 |
| C | -10.777841934714 | 0.596638578165  | -0.062137680735 |
| H | -11.732387913382 | 0.751831900794  | -0.619341238048 |
| H | -10.913379497159 | -0.364312043293 | 0.489049087284  |
| C | -10.607021911428 | 1.700555835178  | 1.006339211371  |
| H | -11.537867965261 | 1.778121903936  | 1.614517426192  |
| H | -9.804970112878  | 1.406030527755  | 1.717970418303  |
| C | -4.572365943066  | -1.620251374647 | 2.828156027482  |
| H | -3.646341626950  | -1.037725416127 | 2.611803245664  |
| C | -4.778814593317  | -1.633157158167 | 4.357872969308  |
| H | -5.688362407471  | -2.215296219645 | 4.639633135095  |
| H | -3.912750101682  | -2.083170331996 | 4.895625924853  |
| C | 6.297624041090   | -2.852291461734 | 3.952868776438  |
| H | 5.433869540796   | -2.179866996432 | 4.159711364806  |
| H | 6.288280359499   | -3.629359261884 | 4.756774025209  |
| C | 7.600793033061   | -2.025810417000 | 4.069199544925  |
| H | 7.734898716821   | -1.451281805432 | 3.119979734988  |
| C | 8.840051704377   | -2.927481584334 | 4.259253349352  |
| H | 8.774973650061   | -3.497359545792 | 5.215796192808  |
| H | 8.954840597195   | -3.670767030073 | 3.436155057109  |
| C | 4.895282482326   | 4.902150209401  | 1.260434560057  |
| C | 2.872054625235   | 3.851908481361  | 1.263454688703  |
| C | 2.625502797408   | 5.230853495710  | 1.172463327021  |
| H | 4.084243219106   | 6.963397108834  | 1.119337429092  |
| C | 3.900942925798   | 5.878889604108  | 1.172350067097  |
| N | 4.257431661157   | 3.662618907156  | 1.309180427272  |
| C | 4.948700884493   | 2.386933291303  | 1.475839376497  |
| H | 5.872598302141   | 2.398961999681  | 0.858405683778  |
| H | 4.317906698175   | 1.570689596425  | 1.056323335246  |
| C | 5.365946061141   | 2.019815064554  | 2.925996806486  |
| H | 5.831849098715   | 2.931893887083  | 3.377528604179  |

|   |                  |                 |                 |
|---|------------------|-----------------|-----------------|
| C | 4.167872662388   | 1.620082502285  | 3.813565844656  |
| H | 4.512673734635   | 1.372529217524  | 4.842958176510  |
| H | 3.417165246210   | 2.438713035957  | 3.901406602019  |
| C | -3.340018980833  | 1.557873651741  | 1.112688477317  |
| C | -5.241392372974  | 2.812516654818  | 1.244139654710  |
| C | -4.748612106198  | 2.664004593959  | 2.550353463521  |
| H | -2.889795403321  | 1.594040520042  | 3.287742597603  |
| C | -3.554163904238  | 1.878156841635  | 2.456251158908  |
| N | -4.377537020484  | 2.128657984857  | 0.376967815823  |
| C | -4.543475119132  | 2.011723112954  | -1.072937420039 |
| H | -4.682478989844  | 3.032524417250  | -1.504785528960 |
| H | -3.589601213808  | 1.624263809760  | -1.495075886056 |
| C | -5.714899644703  | 1.087267590868  | -1.547861831216 |
| H | -6.661657749860  | 1.565236640048  | -1.195379347394 |
| C | -5.753495236816  | 1.089067772425  | -3.086587143236 |
| H | -4.826988192512  | 0.633237567212  | -3.510058622001 |
| H | -6.616142389987  | 0.488579204490  | -3.447880268599 |
| H | 3.658770471424   | 0.715336929272  | 3.404967895449  |
| H | -5.843804254874  | 2.117188519885  | -3.502776413133 |
| H | -4.909678700107  | -0.596347223218 | 4.740765443778  |
| H | 9.776837193736   | -2.325325381105 | 4.283364694271  |
| N | 6.415252862223   | 0.991577268199  | 2.824139603347  |
| H | 6.599831367424   | 0.576209333476  | 3.757465378993  |
| H | 6.067065682624   | 0.206657681300  | 2.243782493113  |
| N | 7.4324446621451  | -1.009276695111 | 5.129355199369  |
| H | 7.200483883928   | -1.466521285695 | 6.027525230031  |
| H | 8.327995014603   | -0.520406719982 | 5.291319408300  |
| N | -5.649142762789  | -0.942749395142 | 2.086753517567  |
| H | -6.571624247204  | -1.306363271543 | 2.379954553477  |
| H | -5.639555145661  | 0.063916822967  | 2.326937726416  |
| N | -5.709144812668  | -0.282880193630 | -1.052617663802 |
| H | -4.922267516964  | -0.833463724475 | -1.434756030034 |
| H | -5.641969027523  | -0.362657071880 | -0.018737258979 |
| C | 8.408053602823   | 7.326510036680  | -1.482799324151 |
| H | 7.454962453230   | 6.945996630686  | -1.913122314833 |
| H | 8.150786766995   | 8.229666327526  | -0.878846914454 |
| H | 9.034078596394   | 7.680596420665  | -2.333091919439 |
| C | 1.279760631295   | 5.898332023599  | 1.064463500067  |
| H | 0.956749852434   | 6.043769387805  | 0.005012638761  |
| H | 0.475647867020   | 5.313127149711  | 1.566970145835  |
| H | 1.291555815204   | 6.907214978902  | 1.533846936193  |
| C | -5.347456583421  | 3.236598297458  | 3.809061600353  |
| H | -5.952041723246  | 4.149636623485  | 3.609095446892  |
| H | -6.020694751805  | 2.514920254514  | 4.331921957427  |
| H | -4.556577845342  | 3.518842510189  | 4.539622933923  |
| C | -10.995159940087 | 6.282326649323  | -1.176773832554 |
| H | -10.874637461369 | 6.238810442544  | -2.286378466705 |
| H | -12.081247142322 | 6.423316306658  | -0.975736192662 |
| H | -10.476822849466 | 7.207288038806  | -0.837710862968 |
| C | 5.740758275857   | -2.733778139065 | -5.288421647100 |
| H | 5.767130338470   | -1.831094788317 | -5.940560940268 |
| H | 5.906964253433   | -3.616749053581 | -5.952617572552 |
| H | 4.702679906625   | -2.824191148209 | -4.897627184257 |
| C | 5.752680886484   | -0.151634234107 | -1.204337647504 |
| H | 6.583708107884   | 0.536907663185  | -0.924025024036 |
| H | 6.057523011751   | -0.675370384219 | -2.138734652960 |

|   |                 |                 |                 |
|---|-----------------|-----------------|-----------------|
| H | 4.876800538465  | 0.486436203406  | -1.455018611183 |
| C | -1.471961454789 | -2.752227383712 | -1.864514212214 |
| H | -0.775282658929 | -1.962744742736 | -1.502615842597 |
| H | -0.867198089858 | -3.682950867297 | -1.991278221759 |
| H | -1.810478318580 | -2.456236825757 | -2.882639945272 |
| C | -7.504946191962 | -7.299377979180 | 0.141527489616  |
| H | -6.484916833179 | -7.238697049153 | -0.300904969245 |
| H | -7.390259118718 | -7.121199313188 | 1.238353220082  |
| H | -7.850899464973 | -8.351287411738 | 0.026771428153  |

## HAMC

|   |                  |                 |                 |
|---|------------------|-----------------|-----------------|
| C | -6.905641908434  | 6.083582168529  | 0.450906815881  |
| C | -8.034246624710  | 6.909531851564  | 0.340461401908  |
| C | -8.913674066565  | 6.558402293156  | 1.414853217721  |
| C | -8.323773544819  | 5.534970001475  | 2.155381518831  |
| N | -7.098691526007  | 5.241072298173  | 1.556997717030  |
| H | -9.887099893966  | 7.021043837589  | 1.640580026729  |
| C | -8.841133560260  | 4.847916282559  | 3.386181721834  |
| H | -9.229901613301  | 3.819496850484  | 3.191341540495  |
| H | -8.071276530059  | 4.757050048310  | 4.187948028681  |
| H | -9.683709960830  | 5.435976409017  | 3.807970977156  |
| C | -6.185586766258  | 4.181966260538  | 1.991322383486  |
| H | -5.257807272619  | 4.279048029531  | 1.388835945125  |
| H | -5.877688276284  | 4.367246238654  | 3.049221806179  |
| C | -6.740105737453  | 2.736994541762  | 1.873157687676  |
| H | -5.874506396255  | 2.038949481057  | 1.986221969669  |
| H | -7.396851355544  | 2.529989906778  | 2.748206248418  |
| C | -7.506929611291  | 2.425946470830  | 0.575095583955  |
| H | -8.347058299400  | 3.153445970242  | 0.466843606993  |
| H | -6.852983740489  | 2.587072489417  | -0.312634888891 |
| C | -8.071256199064  | 0.994268857351  | 0.489104522397  |
| H | -8.616522549346  | 0.901177440425  | -0.480650950130 |
| H | -7.227826937850  | 0.264914928736  | 0.423439529812  |
| C | -9.003941572062  | 0.575767655752  | 1.641412982201  |
| H | -8.416701626388  | 0.352078053424  | 2.562851306900  |
| H | -9.680224652855  | 1.423578429267  | 1.909748516539  |
| C | -9.856501130931  | -0.660679882533 | 1.278293753393  |
| H | -9.216170288735  | -1.424478843278 | 0.782785752569  |
| H | -10.640011330709 | -0.388150781573 | 0.535075601176  |
| C | -5.646606816566  | 6.112775979782  | -0.373619234269 |
| H | -4.751256309725  | 6.192227951394  | 0.291511160670  |
| H | -5.648342228179  | 7.061323152902  | -0.955492829233 |
| C | -5.456157641630  | 4.937876349213  | -1.382688215563 |
| H | -5.407886775745  | 3.969803097927  | -0.835855657608 |
| H | -6.372459065374  | 4.863251693577  | -2.008262982754 |
| C | -0.639245329875  | 4.818081945838  | -3.053891213196 |
| H | -0.383395413035  | 3.891800893323  | -2.493083554980 |
| H | -0.330846761639  | 4.608281497255  | -4.101846543231 |
| C | 0.272694468207   | 5.974973276483  | -2.545366205664 |
| H | 0.055699361745   | 6.245945454360  | -1.487180142828 |
| H | 0.083932033509   | 6.888989980202  | -3.157340282578 |
| C | 1.739246611432   | 5.578524274616  | -2.720013002318 |
| C | 2.642572668302   | 5.633547934392  | -1.499717590579 |
| H | 2.176217490652   | 4.963849347848  | -0.733285069067 |
| H | 2.560195668824   | 6.654327778947  | -1.050095922997 |

|   |                  |                 |                 |
|---|------------------|-----------------|-----------------|
| C | 4.119185078083   | 5.265076640168  | -1.759668269860 |
| H | 4.170498996904   | 4.239208622160  | -2.188911540893 |
| H | 4.508704190121   | 5.931943323107  | -2.561376878565 |
| O | 2.134674032025   | 5.184268684670  | -3.821229735030 |
| C | 6.543270884004   | 4.079103539669  | 2.567989013010  |
| H | 6.666335816800   | 4.760467356951  | 3.441945874664  |
| H | 5.776946914759   | 3.332869719963  | 2.881550264210  |
| C | 7.890114480146   | 3.352991392365  | 2.318164703408  |
| H | 8.635665016705   | 4.119207827576  | 1.988089318509  |
| H | 7.769502773165   | 2.674039869052  | 1.439139601828  |
| C | 8.409681835249   | 2.595788217391  | 3.512337083333  |
| C | 7.929504318953   | 2.549884387360  | 4.822456523999  |
| N | 9.583689274613   | 1.840954166042  | 3.473450402102  |
| C | 8.827773538822   | 1.753778174992  | 5.605490726972  |
| H | 7.027981854833   | 3.059299359616  | 5.194162572459  |
| C | 9.848494322355   | 1.323781930606  | 4.747278684527  |
| C | 11.033669281324  | 0.450241773449  | 5.060425225082  |
| H | 11.512581525060  | 0.809943210521  | 6.002385896708  |
| H | 11.827292553588  | 0.544104431940  | 4.286631517532  |
| C | 10.695138353810  | -1.048726147770 | 5.231670351251  |
| H | 10.136547146707  | -1.235976655148 | 6.179137382390  |
| H | 9.989685611019   | -1.383511242070 | 4.429157697230  |
| C | 11.905786121623  | -1.987106444532 | 5.141889317893  |
| C | 11.706337051078  | -3.393091849604 | 5.700982045338  |
| H | 12.550008948947  | -4.051049217045 | 5.407519219244  |
| H | 11.655350395635  | -3.345932804736 | 6.814198681919  |
| H | 10.740812403489  | -3.832027260717 | 5.360756903115  |
| O | 12.961761141606  | -1.636953637245 | 4.630443692567  |
| N | -10.496078235685 | -1.300668016853 | 2.428429015679  |
| C | -11.585283889792 | -0.783450455539 | 3.134902950038  |
| C | -10.025012404064 | -2.446145079213 | 3.070929490109  |
| C | -11.807225694587 | -1.608728831989 | 4.249199246324  |
| C | -10.825974253769 | -2.648120567447 | 4.197525494549  |
| H | -10.718545521815 | -3.483122177555 | 4.907547751667  |
| C | -12.389987615551 | 0.416602836211  | 2.698284170034  |
| H | -12.515661814243 | 1.105502500059  | 3.567621070861  |
| H | -11.854835095926 | 1.004785832012  | 1.921495805404  |
| C | -13.799227513010 | 0.069180822396  | 2.166211013337  |
| H | -14.359156309501 | -0.562889012992 | 2.894003471035  |
| H | -14.412107454642 | 1.002501428720  | 2.066189657842  |
| C | -13.831977671098 | -0.590626402649 | 0.782747483294  |
| C | -15.086646251936 | -1.393034456482 | 0.456715664125  |
| H | -15.127055245158 | -1.630431238748 | -0.626232493045 |
| H | -15.062950660004 | -2.347322064077 | 1.034297014242  |
| H | -16.011456726569 | -0.857452413388 | 0.769733823637  |
| O | -12.918958207981 | -0.470270471664 | -0.025154563334 |
| C | -8.882637381744  | -3.293539753936 | 2.579503083990  |
| H | -8.971174103711  | -3.484826599562 | 1.481767288285  |
| H | -8.991245885406  | -4.295248444895 | 3.052535390165  |
| C | -7.439799506200  | -2.781126407295 | 2.897433025739  |
| H | -7.253215007676  | -1.809180457579 | 2.381833173945  |
| H | -7.394820395764  | -2.546137633701 | 3.985312699513  |
| C | -6.363271256356  | -3.783738590844 | 2.582227802354  |
| C | -5.837396229439  | -4.786827495131 | 3.410995000849  |
| N | -5.795417020157  | -3.939257484410 | 1.313184020122  |
| C | -4.924375564159  | -5.549757196792 | 2.614450314153  |



|   |                 |                 |                 |
|---|-----------------|-----------------|-----------------|
| C | -4.905251901759 | -5.013356272146 | 1.325449362872  |
| H | -4.330624160942 | -6.413268859257 | 2.953898752452  |
| C | -6.048325142929 | -3.081199903923 | 0.157966907911  |
| H | -6.086822667428 | -3.726549785554 | -0.748073731009 |
| H | -7.069753103826 | -2.649307942541 | 0.254526785556  |
| C | -4.049362075661 | -5.407869866461 | 0.148878091005  |
| H | -4.152301150876 | -6.504427578317 | -0.031260011132 |
| H | -4.390692815985 | -4.921547144140 | -0.791291337920 |
| C | -2.552633768566 | -5.076451833114 | 0.350313595048  |
| H | -2.429903492300 | -4.015751652893 | 0.682602819377  |
| H | -2.120056310225 | -5.683706316455 | 1.178536256434  |
| C | -1.686978614885 | -5.192795585097 | -0.906292053985 |
| C | -0.227192627953 | -5.572376497707 | -0.648063756368 |
| C | 0.679442593159  | -5.590950964523 | -1.891550600622 |
| H | 0.416717661813  | -4.701768858881 | -2.508896485100 |
| H | 0.399339848355  | -6.464298665434 | -2.532566574078 |
| C | 2.158096837724  | -5.602340990983 | -1.574016271684 |
| C | 2.858292574279  | -6.209483976636 | -0.517634912367 |
| N | 3.103794972605  | -4.958746509214 | -2.388343865761 |
| C | 4.245799062685  | -5.872819211835 | -0.689473295406 |
| C | 4.380079233497  | -5.103438387954 | -1.852710958092 |
| H | 5.072678338403  | -6.228724807103 | -0.056484181932 |
| C | 2.803349246960  | -4.199924642345 | -3.606591526703 |
| H | 1.892947719124  | -4.633729925354 | -4.076771079549 |
| H | 3.629964681136  | -4.369229662853 | -4.334251430265 |
| H | 0.156135562038  | -4.860371085440 | 0.123138569770  |
| H | -0.241045799319 | -6.559904117855 | -0.130339283467 |
| O | -2.119205468739 | -4.958194107895 | -2.030666391118 |
| C | 5.619366249931  | -4.495788524419 | -2.457457692957 |
| H | 5.559771863144  | -4.531485666065 | -3.570162780677 |
| H | 5.695228568634  | -3.411743104337 | -2.194448693283 |
| C | 6.922902034728  | -5.202655777469 | -2.004522858008 |
| H | 6.809911798440  | -6.296958145568 | -2.201292890949 |
| H | 7.006783329370  | -5.105949875537 | -0.899674497726 |
| C | 8.173805969033  | -4.703940597469 | -2.680567665438 |
| C | 8.545264304985  | -4.865098030432 | -4.024279545412 |
| N | 9.217074781847  | -4.030537824661 | -2.029323536983 |
| C | 9.837311591475  | -4.269260468740 | -4.176734969356 |
| C | 10.238985458746 | -3.764968122110 | -2.940115963074 |
| H | 10.432409898242 | -4.226149603354 | -5.102254652658 |
| C | 11.527150097712 | -3.094497394606 | -2.562909820229 |
| H | 12.064197460913 | -3.619141125507 | -1.736414789548 |
| H | 12.208780632357 | -3.087473766081 | -3.439495502378 |
| H | 11.399655401971 | -2.033569639700 | -2.239865798949 |
| C | 9.267341949655  | -3.665353754722 | -0.615022911310 |
| H | 8.539621468228  | -4.301029693428 | -0.064061214514 |
| H | 10.271372885253 | -3.939485015912 | -0.211429315970 |
| C | 8.977073421728  | -2.181505801312 | -0.308380842034 |
| H | 9.782917776556  | -1.547564811690 | -0.748197032453 |
| H | 8.027937021802  | -1.882605775685 | -0.810997207384 |
| C | 8.850014647833  | -1.928132467637 | 1.206117009543  |
| H | 9.666719680525  | -2.468281686129 | 1.749108473963  |
| H | 7.895025830485  | -2.386790734890 | 1.549138882553  |
| C | 8.882241604519  | -0.441187030071 | 1.621367008435  |
| H | 8.381762021579  | -0.330334149592 | 2.612030075691  |
| H | 8.265546361986  | 0.158628720845  | 0.907663527590  |

|   |                 |                 |                 |
|---|-----------------|-----------------|-----------------|
| C | 10.302191165836 | 0.146962769621  | 1.721212263559  |
| H | 10.925402511681 | -0.522220211061 | 2.359677158330  |
| H | 10.802509716853 | 0.141969822352  | 0.723182832117  |
| C | 10.377980024412 | 1.592913628019  | 2.267211239996  |
| H | 11.443788340570 | 1.855543629542  | 2.466462564184  |
| H | 10.030864976873 | 2.308017497140  | 1.490967139127  |
| C | 2.617631893138  | -2.693088111918 | -3.356249700528 |
| H | 1.781911290352  | -2.545303351617 | -2.634707128476 |
| H | 3.528139596149  | -2.308882500015 | -2.840818298445 |
| C | 2.352117257231  | -1.882610811624 | -4.636678724907 |
| H | 3.240513548111  | -1.942984874920 | -5.312766605598 |
| H | 1.510049407543  | -2.348934664060 | -5.203064695828 |
| C | 1.999686631579  | -0.402225977307 | -4.380271908233 |
| H | 1.797022026238  | 0.100372351097  | -5.354500369911 |
| H | 1.051136979616  | -0.343484393732 | -3.795684297910 |
| C | -5.020385042888 | -1.946487973841 | -0.034810481868 |
| H | -5.072103721359 | -1.265583823419 | 0.848255028676  |
| H | -3.988982087755 | -2.371351730776 | -0.023194947555 |
| C | -5.237010118946 | -1.139120388409 | -1.330725203669 |
| H | -4.591067002024 | -0.231578508305 | -1.292960296392 |
| H | -6.278961420436 | -0.740408085234 | -1.363096226277 |
| C | -4.954882748086 | -1.925072845847 | -2.625544090186 |
| H | -3.900111777358 | -2.297925060626 | -2.615772933054 |
| H | -5.581692614697 | -2.848133317911 | -2.643343055888 |
| C | -4.281547572140 | 5.066395599905  | -2.313191966183 |
| C | -2.119409077082 | 5.063855344236  | -3.052828577715 |
| C | -2.926393103422 | 5.446366851975  | -4.134611687339 |
| H | -5.181042896155 | 5.692748514573  | -4.245557221005 |
| C | -4.281868911976 | 5.434795195068  | -3.664269788515 |
| N | -2.953660634984 | 4.849733258989  | -1.945833359121 |
| C | -2.519987367858 | 4.442112384307  | -0.604036995270 |
| H | -3.102854064290 | 5.036405899266  | 0.134300603957  |
| H | -1.461872639988 | 4.761754350933  | -0.473737388608 |
| C | -2.647269088094 | 2.943048013779  | -0.252385466465 |
| H | -2.494130097895 | 2.867824884304  | 0.852280270325  |
| H | -3.691390590974 | 2.595574258095  | -0.436159261856 |
| C | -1.644515909592 | 2.016623879497  | -0.958710979816 |
| H | -1.898542111861 | 1.935687229402  | -2.042780849990 |
| H | -0.628486070478 | 2.478854598684  | -0.919742042784 |
| C | -1.545521565593 | 0.617539268270  | -0.326325665325 |
| H | -1.287318060335 | 0.726846004547  | 0.754471361054  |
| H | -2.531450042672 | 0.098069180607  | -0.346585096449 |
| C | 5.028129089423  | 5.404196618930  | -0.569072551584 |
| C | 6.074676893919  | 4.894863898587  | 1.392885806495  |
| C | 6.497325752852  | 6.177310325454  | 1.013183006275  |
| H | 5.939724504354  | 7.414361373058  | -0.801572902338 |
| C | 5.835739437027  | 6.486240465184  | -0.217778719769 |
| N | 5.172812881670  | 4.434866474730  | 0.423978193275  |
| C | 4.487801379932  | 3.142213090199  | 0.451806238769  |
| H | 4.252893117638  | 2.901504893703  | 1.513479067661  |
| H | 3.503810718814  | 3.244387025130  | -0.058586733315 |
| C | 5.260973380743  | 1.971791857608  | -0.196268873469 |
| H | 5.336968441964  | 2.153495957399  | -1.293414215044 |
| H | 6.310083998755  | 1.962482671084  | 0.181597479888  |
| C | 4.601327771246  | 0.601340804430  | 0.065764424413  |
| H | 3.507808614532  | 0.670066596940  | -0.152692406644 |

|   |                  |                 |                 |
|---|------------------|-----------------|-----------------|
| H | 5.010724350071   | -0.139062627283 | -0.659813261426 |
| C | 4.817030326003   | 0.059923628668  | 1.495231214042  |
| H | 4.532363714015   | 0.830350027679  | 2.249594955529  |
| H | 5.901571457765   | -0.136154311336 | 1.658093336767  |
| C | -0.472492332443  | -0.241210078028 | -1.024309683788 |
| H | -0.863758175493  | -0.621426287258 | -2.001107012805 |
| H | 0.420584109218   | 0.374142665869  | -1.275746498294 |
| C | -0.032745356483  | -1.456189426127 | -0.220932802484 |
| C | 4.013528392860   | -1.212778413893 | 1.812477229462  |
| H | 4.156732800171   | -1.495728831810 | 2.884426194833  |
| H | 2.921141309948   | -1.036629888531 | 1.693686486541  |
| C | 4.419088725282   | -2.438287691072 | 0.996325310526  |
| C | -5.225326995178  | -1.166947523134 | -3.942015834397 |
| H | -5.145574645445  | -1.901050764819 | -4.776286391422 |
| H | -6.278820579991  | -0.800257802339 | -3.954585127398 |
| C | -4.281854086797  | 0.008095723069  | -4.262031652708 |
| H | -3.246235373316  | -0.191319745720 | -3.889973717139 |
| H | -4.155087103232  | 0.122033959052  | -5.364501046646 |
| C | -4.704053504992  | 1.384660319301  | -3.744199258175 |
| C | 3.103548471120   | 0.379820001932  | -3.625942497116 |
| H | 3.288316070101   | -0.087961141655 | -2.634154188569 |
| H | 4.051873620949   | 0.349946877735  | -4.209190130435 |
| C | 2.709854852277   | 1.829315384708  | -3.367505454603 |
| O | 1.307161898753   | -1.662604314152 | -0.344210480363 |
| H | 1.591101939431   | -2.466091709944 | 0.167391238838  |
| O | 3.399298959329   | -3.330712867175 | 0.870885946145  |
| H | 3.729785876495   | -4.141987221161 | 0.366360226544  |
| O | 3.186756288322   | 2.663892175820  | -4.309397488023 |
| H | 2.872431645961   | 3.601738468566  | -4.124905549629 |
| O | -3.842513143804  | 2.333629211697  | -4.184063237297 |
| H | -4.150380152275  | 3.234540878545  | -3.875975539699 |
| O | -0.760721722551  | -2.170838764765 | 0.451040375627  |
| O | 5.532317607254   | -2.633006522034 | 0.530520124100  |
| O | 2.020011632782   | 2.191200650798  | -2.413649511982 |
| O | -5.680752941017  | 1.624241362165  | -3.048138382447 |
| C | 7.746105719511   | -5.551857033045 | -5.101624593475 |
| H | 7.120722651232   | -6.381577173078 | -4.699526704902 |
| H | 7.054717460927   | -4.856459764939 | -5.637165371828 |
| H | 8.412897386182   | -5.991776868626 | -5.876412278814 |
| C | 2.332527872658   | -7.081180909231 | 0.597628364769  |
| H | 1.775191083255   | -6.509406551346 | 1.375466759259  |
| H | 1.650325051179   | -7.879741974541 | 0.227951127199  |
| H | 3.174243692018   | -7.591220675809 | 1.114893637508  |
| C | -6.194322310850  | -5.043107153752 | 4.851738792823  |
| H | -6.532838539595  | -4.119059940535 | 5.372586310993  |
| H | -7.016432022151  | -5.791062582372 | 4.960573082750  |
| H | -5.323380897037  | -5.441122434746 | 5.419359746246  |
| C | -12.885361080364 | -1.445757054415 | 5.288922370097  |
| H | -13.830420990908 | -1.979149180082 | 5.022314009767  |
| H | -12.559833570762 | -1.854792651163 | 6.271380344994  |
| H | -13.155831903352 | -0.377407042135 | 5.453000813299  |
| C | 8.697596168077   | 1.439150372280  | 7.072765091190  |
| H | 8.045069026237   | 0.553182755058  | 7.264745592842  |
| H | 9.683072505311   | 1.221152581408  | 7.543281087781  |
| H | 8.249082747925   | 2.290763419864  | 7.632018856485  |
| C | 7.483869642158   | 7.051038876934  | 1.742541982325  |

|   |                 |                |                 |
|---|-----------------|----------------|-----------------|
| H | 7.528610134361  | 6.818086553101 | 2.830136556745  |
| H | 8.522659328213  | 6.941835332204 | 1.347904382281  |
| H | 7.218901103683  | 8.127908573060 | 1.646610845528  |
| C | -2.473932014238 | 5.785830637020 | -5.529469444026 |
| H | -2.367733021070 | 6.886378691159 | -5.680678716165 |
| H | -1.489508257649 | 5.329665726691 | -5.775807357043 |
| H | -3.203818158175 | 5.426549247950 | -6.288661219371 |
| C | -8.293557609701 | 7.967486930269 | -0.699494945032 |
| H | -7.361437775822 | 8.305483572989 | -1.204794443492 |
| H | -8.981508601337 | 7.608160119720 | -1.501664112556 |
| H | -8.769393041083 | 8.868899558232 | -0.251206112801 |

## PAMBA

|   |                 |                 |                 |
|---|-----------------|-----------------|-----------------|
| C | 6.196883121766  | -0.526197894792 | -3.310670556269 |
| C | 7.082514178555  | -1.331880713210 | -4.041806592414 |
| C | 8.366214982791  | -1.213610128975 | -3.416604501701 |
| C | 8.248688045863  | -0.347863900999 | -2.329083234170 |
| N | 6.922936643276  | 0.078212699519  | -2.277518546229 |
| H | 9.296177373323  | -1.711282772109 | -3.732673710791 |
| C | 9.291152534513  | 0.100020517859  | -1.347382016895 |
| H | 9.432737679265  | 1.207565221240  | -1.340587476256 |
| H | 9.067017457576  | -0.203823603780 | -0.296826947440 |
| H | 10.269607733570 | -0.351339431405 | -1.615303323330 |
| C | 6.345944160252  | 0.847961917665  | -1.177293492947 |
| H | 7.097850620419  | 1.596504864554  | -0.836301980923 |
| H | 5.488415036952  | 1.443300265345  | -1.568547600782 |
| C | 5.881553314953  | -0.020621156851 | 0.010574292741  |
| H | 5.195630486925  | -0.814151266022 | -0.368405134744 |
| H | 6.765580623730  | -0.557500531612 | 0.428278900376  |
| C | 5.174437873872  | 0.794963249145  | 1.106190046665  |
| H | 5.842134282590  | 1.625772893384  | 1.446667293004  |
| H | 4.277955054705  | 1.293008808306  | 0.662628783027  |
| C | 4.720635169176  | -0.017545422425 | 2.336153402999  |
| H | 4.120329997435  | 0.654474143084  | 2.994316217322  |
| H | 4.020006538465  | -0.824780547080 | 2.011050558128  |
| C | 5.863213003772  | -0.637414788533 | 3.165134458701  |
| H | 6.387894782340  | -1.438045698697 | 2.593033810885  |
| H | 6.633811517109  | 0.141586021618  | 3.378570897996  |
| C | 5.343011892413  | -1.221747694555 | 4.495939249963  |
| H | 4.541008908033  | -1.964711474179 | 4.286789354278  |
| H | 4.860072256617  | -0.411690080733 | 5.083596259164  |
| C | 4.746823233635  | -0.247760980633 | -3.587557781496 |
| H | 4.207967577064  | 0.068998454105  | -2.665875301356 |
| H | 4.250361736396  | -1.195376390270 | -3.903265188579 |
| C | 4.475741425284  | 0.802062402967  | -4.714209078841 |
| H | 4.970751414507  | 1.767839539915  | -4.455562944837 |
| H | 4.979933885751  | 0.458413437597  | -5.645031998133 |
| C | -0.323414915609 | 2.502174980576  | -4.323944322288 |
| H | -0.034962185346 | 3.562976602299  | -4.138898448011 |
| H | -1.032591142948 | 2.546316077139  | -5.179627519793 |
| C | -1.133875441157 | 1.944585138046  | -3.083964401639 |
| H | -0.934058052978 | 0.856981139321  | -2.965925410333 |
| H | -2.221200976326 | 2.076335416948  | -3.284053060557 |
| C | -0.786999287921 | 2.671396220000  | -1.795410245248 |

|   |                  |                 |                 |
|---|------------------|-----------------|-----------------|
| C | -1.510040699543  | 3.988038296240  | -1.537883791905 |
| H | -2.597586463289  | 3.727224814826  | -1.485801400462 |
| H | -1.447953604464  | 4.608808793460  | -2.465099357236 |
| C | -1.073293955215  | 4.788236273244  | -0.279741444202 |
| H | -0.454228417415  | 4.123375397190  | 0.366944934949  |
| H | -0.403135913155  | 5.621799480531  | -0.584228078749 |
| O | 0.047701313721   | 2.231832862079  | -0.993646252544 |
| C | -5.360880966265  | 4.780414997848  | 2.401189083112  |
| H | -5.129132654551  | 3.843985902683  | 2.960170975976  |
| H | -5.758252411110  | 5.479480144611  | 3.171735639597  |
| C | -6.482707876682  | 4.500992489961  | 1.340391988481  |
| H | -5.997360862507  | 4.070528797698  | 0.434422983273  |
| H | -6.888501095837  | 5.482924859251  | 1.007354692639  |
| C | -7.633465440310  | 3.639175759328  | 1.783234814368  |
| C | -8.853782595685  | 4.005169101298  | 2.352107056913  |
| N | -7.623953033297  | 2.246832758730  | 1.686097196168  |
| C | -9.610692486268  | 2.817551370158  | 2.605290928059  |
| H | -9.169694761301  | 5.037719623631  | 2.568500426038  |
| C | -8.832985240131  | 1.732006826146  | 2.165590400576  |
| C | -9.162734149531  | 0.258157150606  | 2.222823556496  |
| H | -9.274287511008  | -0.055561574691 | 3.289833409393  |
| H | -8.327900494526  | -0.353250752709 | 1.815884506367  |
| C | -10.458266546114 | -0.146310609129 | 1.482521384437  |
| H | -10.759644881254 | -1.179302491384 | 1.796322918212  |
| H | -11.316176302621 | 0.497687081859  | 1.779803313376  |
| C | -10.376171191207 | -0.209789815791 | -0.046617627335 |
| C | -11.697279683769 | -0.056635655247 | -0.789333087855 |
| H | -11.594910908084 | -0.373324051894 | -1.847890964449 |
| H | -12.516845786066 | -0.625559782392 | -0.294969104863 |
| H | -11.998470576132 | 1.017550626730  | -0.762774596941 |
| O | -9.320755701774  | -0.399017704175 | -0.641429558440 |
| N | 6.353750061006   | -1.880272919224 | 5.327945703988  |
| C | 7.325178347383   | -1.236120905504 | 6.105028300298  |
| C | 6.522410733542   | -3.262106161199 | 5.431844180120  |
| C | 8.120566107183   | -2.224644818466 | 6.707167963304  |
| C | 7.609520280923   | -3.488328755055 | 6.278434021962  |
| H | 7.991651970419   | -4.480664019899 | 6.564463821345  |
| C | 7.465582226123   | 0.256378554305  | 6.275203433284  |
| H | 8.555489485044   | 0.485392493783  | 6.305077307234  |
| H | 7.064649278524   | 0.815694458435  | 5.401257505013  |
| C | 6.826352649142   | 0.849436849695  | 7.560729298826  |
| H | 6.869341814781   | 0.130931032792  | 8.412949731034  |
| H | 7.412440026967   | 1.737965329165  | 7.911252543603  |
| C | 5.401452071423   | 1.367884913767  | 7.402616393744  |
| C | 4.583900287030   | 1.607660726782  | 8.655949914833  |
| H | 3.712282893124   | 2.260564949604  | 8.437355632983  |
| H | 4.210072571838   | 0.623334676816  | 9.026714896615  |
| H | 5.201686128938   | 2.037949007670  | 9.475211149151  |
| O | 4.942563335438   | 1.594358978438  | 6.280154421693  |
| C | 5.671609961478   | -4.293997433133 | 4.742344662555  |
| H | 4.584116690737   | -4.110913697362 | 4.928777571058  |
| H | 5.890440897837   | -5.266605749868 | 5.236369974120  |
| C | 5.918889154220   | -4.473543438244 | 3.207714431485  |
| H | 5.477042743438   | -3.617700211277 | 2.644305712288  |
| H | 7.016112553099   | -4.405894373370 | 3.032989492854  |
| C | 5.446391285831   | -5.786679060101 | 2.647487691304  |

|   |                  |                 |                 |
|---|------------------|-----------------|-----------------|
| C | 6.184969936922   | -6.951948260633 | 2.394981053073  |
| N | 4.105706816478   | -6.055455741475 | 2.341340379164  |
| C | 5.259949969443   | -7.932096466092 | 1.907773710322  |
| C | 3.984835231425   | -7.366734951712 | 1.873854546686  |
| H | 5.498074163879   | -8.968307511365 | 1.620772489015  |
| C | 3.052852126435   | -5.050532125783 | 2.324907270357  |
| H | 2.065392420402   | -5.565319657332 | 2.361045244885  |
| H | 3.106012006405   | -4.441355333518 | 3.257137258164  |
| C | 2.697731820695   | -8.011077015199 | 1.427450604693  |
| H | 2.865146702579   | -9.108330794098 | 1.486917987296  |
| H | 1.865643264803   | -7.795301603974 | 2.139472835383  |
| C | 2.207223281590   | -7.655630258871 | -0.002808578422 |
| H | 3.013137650233   | -7.177005462008 | -0.609435990062 |
| H | 1.954109520205   | -8.580346621430 | -0.580416862674 |
| C | 0.961170772713   | -6.772949948408 | -0.081285340206 |
| C | 0.510421892437   | -6.320353604101 | -1.475883944022 |
| C | 0.222698219865   | -4.790002341791 | -1.517778494638 |
| H | 1.192654533478   | -4.254233390303 | -1.584183181268 |
| H | -0.211138798570  | -4.498171837579 | -0.533564281423 |
| C | -0.660154650255  | -4.319717832996 | -2.635917221740 |
| C | -0.348880661140  | -3.698063829287 | -3.850960143317 |
| N | -2.052944068892  | -4.464299010597 | -2.576355648680 |
| C | -1.594860392466  | -3.456938330749 | -4.527646014735 |
| C | -2.635606391086  | -3.929353512832 | -3.725272509014 |
| H | -1.709235350391  | -3.003874988880 | -5.523924951335 |
| C | -2.773612827012  | -4.947275414459 | -1.406872538514 |
| H | -2.329093084762  | -5.907134272089 | -1.056148601124 |
| H | -3.813271783233  | -5.200239580777 | -1.717778668804 |
| H | 1.243663801160   | -6.610803562856 | -2.261680571241 |
| H | -0.423106197884  | -6.892249101476 | -1.700241565028 |
| O | 0.318466227624   | -6.447089087614 | 0.913751104632  |
| C | -4.126764168288  | -3.922523283454 | -3.935786647742 |
| H | -4.534631078528  | -4.964284488432 | -3.924132628280 |
| H | -4.633005753883  | -3.408076997281 | -3.082463466673 |
| C | -4.585865524118  | -3.245904230174 | -5.253674833001 |
| H | -4.214595174849  | -3.848085443090 | -6.115488186872 |
| H | -4.080571314511  | -2.256672620061 | -5.348073962584 |
| C | -6.080216974796  | -3.100697338052 | -5.357157860896 |
| C | -7.029479952619  | -4.047650334496 | -5.765942002646 |
| N | -6.773276085131  | -1.955772297861 | -4.940565683563 |
| C | -8.319926109781  | -3.450558833258 | -5.584826112837 |
| C | -8.144795484116  | -2.164963608350 | -5.073004870533 |
| H | -9.292595986371  | -3.913979284633 | -5.812142382807 |
| C | -9.170187809103  | -1.130069355376 | -4.710796775929 |
| H | -9.042580393017  | -0.174116438046 | -5.273897990805 |
| H | -10.182602553314 | -1.515516032872 | -4.956195328485 |
| H | -9.168948425276  | -0.872532705052 | -3.624200740121 |
| C | -6.164889620364  | -0.723271442248 | -4.450706934328 |
| H | -5.161788454527  | -0.615143542214 | -4.923977196308 |
| H | -6.764724205806  | 0.140403581125  | -4.821396226545 |
| C | -6.028342575321  | -0.638386139027 | -2.917941405391 |
| H | -7.042231372247  | -0.607780481199 | -2.457002131889 |
| H | -5.551244125037  | -1.572214326952 | -2.537989422786 |
| C | -5.189610385762  | 0.571962289549  | -2.470507253762 |
| H | -5.560657288663  | 1.499761193408  | -2.974330813039 |
| H | -4.141120365331  | 0.431893036675  | -2.831616439150 |

|   |                 |                 |                 |
|---|-----------------|-----------------|-----------------|
| C | -5.183146726984 | 0.792809703089  | -0.945350466633 |
| H | -4.337554266584 | 1.471006810553  | -0.672723959814 |
| H | -4.961193108289 | -0.176917284182 | -0.438140499339 |
| C | -6.495578281728 | 1.380065515462  | -0.399403432976 |
| H | -6.657604262579 | 2.393318493039  | -0.838844351223 |
| H | -7.364530361020 | 0.761950172670  | -0.712966337409 |
| C | -6.501834535434 | 1.484913628891  | 1.137094546399  |
| H | -6.496121072591 | 0.469105848125  | 1.591186121840  |
| H | -5.558585280711 | 1.958791938066  | 1.490058797626  |
| C | 3.011715417400  | 0.976368012135  | -5.010980281809 |
| C | 0.853248914824  | 1.687991498389  | -4.778311112811 |
| C | 0.859985586929  | 0.679234264293  | -5.755140123262 |
| H | 2.582664921228  | -0.537031877043 | -6.578368839719 |
| C | 2.215152654812  | 0.243212473061  | -5.894069413655 |
| N | 2.167176357757  | 1.847713099496  | -4.321186443455 |
| C | 2.591565512606  | 2.815489527770  | -3.316150963881 |
| H | 3.650104712773  | 2.590459261074  | -3.052220385853 |
| H | 2.018325736723  | 2.664668581954  | -2.375016690124 |
| C | -2.231891127551 | 5.370407128304  | 0.483518039447  |
| C | -4.131512197304 | 5.364299335230  | 1.759267467227  |
| C | -3.897798716085 | 6.686080787320  | 1.353804678959  |
| H | -2.240574753803 | 7.549162827957  | 0.066727958398  |
| C | -2.703647405987 | 6.678607563000  | 0.557049835712  |
| N | -3.112499020991 | 4.567547200680  | 1.212725608014  |
| C | -2.802083283476 | 3.194947474670  | 1.606506213593  |
| H | -2.568539852606 | 2.578926465697  | 0.708843964298  |
| C | 2.493313109369  | 4.273157903000  | -3.749942287239 |
| C | 2.254483191794  | 5.274528757867  | -2.780666515188 |
| C | 2.654347181470  | 4.653598005709  | -5.100089541869 |
| C | 2.178296026689  | 6.624441823861  | -3.149825165375 |
| H | 2.119783747708  | 4.987998803230  | -1.720737407962 |
| C | 2.576774800534  | 6.003909752541  | -5.474986425265 |
| H | 2.829431745959  | 3.878539838238  | -5.867995482952 |
| C | 2.336542013047  | 7.002068681946  | -4.502575245260 |
| H | 1.989069471281  | 7.410636539776  | -2.398037912207 |
| H | 2.702523629433  | 6.290572313881  | -6.532560939719 |
| C | 3.082049875041  | -4.121002054909 | 1.111695358090  |
| C | 2.217317159858  | -3.007590725927 | 1.073112363174  |
| C | 3.950193535525  | -4.350070746978 | 0.020937276903  |
| C | 2.209830024197  | -2.135269440860 | -0.035042735204 |
| H | 1.526904210168  | -2.795583707864 | 1.910434646719  |
| C | 3.937281201311  | -3.490638593681 | -1.094362003071 |
| H | 4.653405877604  | -5.201587329220 | 0.049416028237  |
| C | 3.066749241008  | -2.390243813214 | -1.129510576849 |
| H | 4.623020636534  | -3.674837167207 | -1.940877986982 |
| H | 3.039693061986  | -1.725677550862 | -2.005431472471 |
| C | -2.826077569878 | -3.972295574033 | -0.233362684763 |
| C | -2.997686510525 | -4.476505375342 | 1.075667654165  |
| C | -2.716987219163 | -2.577347310777 | -0.418332745127 |
| C | -3.087139450038 | -3.608875731716 | 2.170547444155  |
| H | -3.041804722364 | -5.568662338772 | 1.239682259818  |
| C | -2.804132291291 | -1.703289873114 | 0.677586042139  |
| H | -2.538128757268 | -2.172511817809 | -1.431079665143 |
| C | -3.004957584121 | -2.210573385137 | 1.981088450435  |
| H | -3.212640984752 | -3.999071777684 | 3.195463371226  |
| H | -2.696157193858 | -0.617407334414 | 0.524982934613  |

|   |                  |                 |                 |
|---|------------------|-----------------|-----------------|
| H | -3.723616471674  | 2.739704978173  | 2.032243589547  |
| C | -1.660639204506  | 3.073436118508  | 2.610967627833  |
| C | -1.528848998888  | 3.984371904465  | 3.684434926405  |
| C | -0.722371752277  | 2.027093764796  | 2.480009672096  |
| C | -0.478542467928  | 3.848476525446  | 4.604776108105  |
| H | -2.247237503719  | 4.818506040487  | 3.788656741513  |
| C | 0.336523303352   | 1.898767721063  | 3.390563137193  |
| H | -0.791954629084  | 1.302913322566  | 1.650263255872  |
| C | 0.471802996858   | 2.812234915190  | 4.459491390492  |
| H | -0.365079671166  | 4.556436605942  | 5.444560532532  |
| H | 1.066110326427   | 1.083116849019  | 3.257820461376  |
| C | 2.232336043784   | 8.457976854897  | -4.844627475840 |
| C | 1.291141416085   | -0.943253854278 | -0.007637065482 |
| C | -3.098385718846  | -1.332359819289 | 3.190136533297  |
| C | 1.616810682821   | 2.728618033887  | 5.431083246338  |
| O | 2.406953438089   | 8.700871886723  | -6.176981694939 |
| H | 2.319570973929   | 9.676642658992  | -6.284292981967 |
| O | 1.451753748338   | -0.136321028655 | -1.077896734595 |
| H | 0.851854260739   | 0.669818695446  | -0.992376798137 |
| O | 2.551352452824   | 1.837586057828  | 5.038727831140  |
| H | 3.335359754246   | 1.868764891111  | 5.666746021171  |
| O | -3.231584456466  | -0.005720034807 | 2.876658912883  |
| H | -3.183918946531  | 0.481898513284  | 3.732683152827  |
| O | 2.013202225451   | 9.348626021556  | -4.037122287074 |
| O | 1.704567831155   | 3.402222900477  | 6.453523496446  |
| O | -3.074399377810  | -1.729316878833 | 4.344824357758  |
| O | 0.494752361318   | -0.726642800172 | 0.901025461916  |
| C | -6.749266737168  | -5.437876071586 | -6.273388607146 |
| H | -5.723409079287  | -5.531531517979 | -6.695573463834 |
| H | -6.839952409636  | -6.210666998227 | -5.472251597886 |
| H | -7.463123167191  | -5.728589351054 | -7.076912314193 |
| C | 1.020502665753   | -3.324324914390 | -4.355742808051 |
| H | 1.178789522817   | -2.219406489437 | -4.357870734683 |
| H | 1.829874523204   | -3.768975603008 | -3.736611942379 |
| H | 1.179529089964   | -3.670684637774 | -5.402951725941 |
| C | 7.658583053851   | -7.159513250070 | 2.624460666580  |
| H | 7.865626909841   | -7.683540456620 | 3.588000832490  |
| H | 8.109844609706   | -7.781893147051 | 1.819159337607  |
| H | 8.219908306135   | -6.199363543305 | 2.654328300876  |
| C | 9.278663962953   | -1.999913260437 | 7.643870506852  |
| H | 8.957117368335   | -1.872839595735 | 8.706013632182  |
| H | 9.980723007402   | -2.862574102120 | 7.625643228295  |
| H | 9.868782609680   | -1.091827295915 | 7.379951262530  |
| C | -10.973592063731 | 2.761605618441  | 3.248096956096  |
| H | -11.808172257686 | 2.757047045939  | 2.505108858424  |
| H | -11.104515449695 | 1.859175211547  | 3.888141999896  |
| H | -11.139720104131 | 3.647616343324  | 3.900136612931  |
| C | -4.767974726707  | 7.881010611707  | 1.641371041136  |
| H | -5.453246189629  | 8.121933325534  | 0.793461191884  |
| H | -5.405812866414  | 7.727723130848  | 2.540137003653  |
| H | -4.154944550994  | 8.792257628665  | 1.823727748397  |
| C | -0.335627658115  | 0.139904425085  | -6.494755061741 |
| H | -0.897099915829  | -0.613390323689 | -5.891336311382 |
| H | -1.063126200870  | 0.938635152639  | -6.768837354769 |
| H | -0.030366487462  | -0.362985951290 | -7.438151194731 |
| C | 6.752895703008   | -2.140109955068 | -5.269391786609 |



|   |                |                 |                 |
|---|----------------|-----------------|-----------------|
| H | 6.930526803409 | -1.574749930970 | -6.216056929907 |
| H | 7.377589924492 | -3.059484339831 | -5.326686044264 |
| H | 5.687080985883 | -2.464209283588 | -5.285910285435 |

### [Cu(H<sub>2</sub>O)<sup>5</sup>]<sup>2+</sup>

|    |                 |                 |                 |
|----|-----------------|-----------------|-----------------|
| Cu | 0.062351457602  | -0.044061602990 | 0.068621530372  |
| O  | 1.550658763260  | 0.776269316751  | -1.120923676694 |
| H  | 2.486927982390  | 0.528974794413  | -0.924777227407 |
| H  | 1.500637778238  | 0.917989600679  | -2.096803135172 |
| O  | -0.154539243163 | 1.847634352773  | 0.829496376553  |
| H  | 0.366886719758  | 2.563644501494  | 0.392219807813  |
| H  | -1.009201861148 | 2.257229124433  | 1.102998650918  |
| O  | 1.410428208584  | -0.670950350150 | 1.700261374537  |
| H  | 1.822637545075  | -1.554413852959 | 1.827496172707  |
| H  | 1.716126297099  | -0.133149956274 | 2.464432194785  |
| O  | 0.152717957215  | -1.878618210568 | -0.847627502975 |
| H  | 0.492402581975  | -2.045355147829 | -1.758550230738 |
| H  | -0.626286083994 | -2.474402602116 | -0.730123014346 |
| O  | -1.688828584661 | -0.736097992615 | 0.938766204272  |
| H  | -1.680933235647 | -0.932661090511 | 1.906814446316  |
| H  | -2.603157766584 | -0.430441300531 | 0.725947711059  |

### [Cu(H<sub>2</sub>O)<sub>6</sub>]<sup>2+</sup>

|    |                 |                 |                 |
|----|-----------------|-----------------|-----------------|
| Cu | -0.004419254942 | -0.087305738948 | -0.007205583753 |
| O  | -0.234492572380 | -0.369019441966 | -2.073502817194 |
| H  | -1.128594728865 | -0.026131723099 | -2.315504404877 |
| H  | 0.381662301241  | 0.223824649450  | -2.566474540137 |
| O  | 0.448033000614  | 1.916539081236  | -0.290148352074 |
| H  | -0.125363568632 | 2.277303236337  | -1.008934768631 |
| H  | 0.180445875122  | 2.435758639872  | 0.506442262359  |
| O  | 2.297109069385  | -0.604068053105 | -0.121684567149 |
| H  | 2.776859747395  | 0.001317222618  | 0.487382855693  |
| H  | 2.400606986739  | -1.478781901304 | 0.316246888750  |
| O  | -0.440851618248 | -2.099514586486 | 0.257303475386  |
| H  | -0.074115456395 | -2.620117383288 | -0.497202308331 |
| H  | 0.054657322388  | -2.444445968599 | 1.038512118337  |
| O  | 0.179608284259  | 0.092896996099  | 2.072957796938  |
| H  | -0.263317104046 | 0.916673130089  | 2.388238832333  |
| H  | 1.132818666628  | 0.243784412350  | 2.281633884710  |
| O  | -2.303658061328 | 0.470347090625  | 0.126076024955  |
| H  | -2.402335173726 | 1.355507295890  | -0.291304692578 |
| H  | -2.806082086210 | -0.114182326770 | -0.484931720737 |

### 3-H<sub>2</sub>O

|   |                 |                |                 |
|---|-----------------|----------------|-----------------|
| O | -0.364120290237 | 3.112901996930 | 1.372424705754  |
| H | 0.491435983906  | 2.680305464626 | 1.170560254402  |
| H | -0.937417610391 | 2.830683071413 | 0.601323083671  |
| O | -0.630108490041 | 5.455714600477 | -0.142324294796 |
| H | -0.353768064902 | 4.785690384454 | 0.548754685990  |
| H | -1.286224246934 | 6.000250971992 | 0.339865740207  |
| O | -1.797847589720 | 3.065389043615 | -1.032870354689 |
| H | -2.758902864181 | 3.164960239583 | -0.872566479957 |

|   |                 |                |                 |
|---|-----------------|----------------|-----------------|
| H | -1.461927177502 | 4.007392316909 | -0.986812730581 |
|---|-----------------|----------------|-----------------|

#### 4-H<sub>2</sub>O

|   |                 |                |                 |
|---|-----------------|----------------|-----------------|
| O | 0.898046302826  | 3.652364809909 | 1.303762346649  |
| H | 0.829791349310  | 3.752673108264 | 2.274931105432  |
| H | 0.386854511134  | 2.800427878531 | 1.122055576013  |
| O | -0.754933465720 | 5.350755453764 | -0.091430523344 |
| H | -0.066646893411 | 4.824720325577 | 0.427853701659  |
| H | -1.209827569289 | 5.874380842254 | 0.599402748547  |
| O | -2.289985835519 | 3.201296678277 | -0.846572518549 |
| H | -2.082160295913 | 3.112979877502 | -1.799488997528 |
| H | -1.810199904651 | 4.052951999434 | -0.593069048369 |
| O | -0.743421150121 | 1.532536996297 | 0.685835081345  |
| H | -1.359084838064 | 1.289962655234 | 1.407325961549  |
| H | -1.338744660582 | 2.047296464956 | 0.052152426595  |

#### A2P-Cu(II)

|   |                 |                 |                 |
|---|-----------------|-----------------|-----------------|
| C | 7.728473099704  | 0.821319208015  | -2.292070595695 |
| C | 8.740389986630  | 1.483041801821  | -3.023277315743 |
| C | 9.739401523789  | 1.867590163729  | -2.084933752407 |
| C | 9.337447045476  | 1.452667819925  | -0.807582342796 |
| N | 8.104680175831  | 0.812332967319  | -0.946485488257 |
| H | 10.667232730845 | 2.416936827871  | -2.305222538815 |
| C | 10.021829647828 | 1.669289913245  | 0.507223066647  |
| H | 10.337722937772 | 0.723222036488  | 1.004371204278  |
| H | 10.935782110524 | 2.278690247392  | 0.350281245300  |
| H | 9.379215704548  | 2.221517304195  | 1.233133553587  |
| C | 7.406196393637  | 0.071629710407  | 0.106829138777  |
| H | 7.729958695105  | 0.481712099867  | 1.089088327384  |
| H | 6.315051875317  | 0.287766643807  | 0.034360292658  |
| C | 7.645906231340  | -1.455892505001 | 0.062074086648  |
| H | 6.977818641764  | -1.929678516452 | 0.822382913664  |
| H | 7.306472889795  | -1.841826353017 | -0.928923843720 |
| C | 9.105176801811  | -1.870207690238 | 0.321081651745  |
| H | 9.774853057771  | -1.316067899754 | -0.379649165744 |
| H | 9.393763358110  | -1.541160792786 | 1.347785422941  |
| C | 9.402404555473  | -3.376440404359 | 0.186450360478  |
| H | 10.443128094133 | -3.553959642566 | 0.547698807847  |
| H | 8.745966179748  | -3.960811012359 | 0.877482831671  |
| C | 9.281927846377  | -3.935438301038 | -1.245382115071 |
| H | 8.213244718308  | -3.991533541634 | -1.566452637967 |
| H | 9.775713519219  | -3.236178601871 | -1.962847069444 |
| C | 9.930627819107  | -5.328103306341 | -1.370471917128 |
| H | 9.462784932037  | -6.037216990118 | -0.651587396209 |
| H | 11.006701818567 | -5.293546122165 | -1.090779319990 |
| C | 6.372482123135  | 0.396882455039  | -2.772146417114 |
| H | 5.990804888163  | -0.489552196526 | -2.214439739629 |
| H | 6.442815071887  | 0.076888117438  | -3.836131234964 |
| C | 5.330457913553  | 1.565476306822  | -2.674734486357 |
| H | 5.252525816129  | 1.905241486397  | -1.617167707453 |
| H | 5.743341854423  | 2.432412306306  | -3.236298374496 |
| C | 0.536853749140  | -0.125571610464 | -2.968714352492 |
| H | 0.301166985527  | 0.019438995221  | -1.888373161521 |

|   |                  |                 |                 |
|---|------------------|-----------------|-----------------|
| H | -0.279377129249  | 0.380865013845  | -3.530889638689 |
| C | 0.464145762205   | -1.684982978794 | -3.278372553486 |
| H | 1.121388623310   | -2.221434824902 | -2.551003451343 |
| H | 0.854083018303   | -1.865756643505 | -4.302534863096 |
| C | -0.941618761785  | -2.184340888697 | -3.154259993737 |
| C | -1.790862346619  | -2.459852869797 | -4.361592632513 |
| H | -2.553013660362  | -3.219808592400 | -4.082337115962 |
| H | -1.189277992114  | -2.864277888693 | -5.203668848780 |
| C | -2.548135630807  | -1.145629205089 | -4.854302978263 |
| H | -2.790191021822  | -0.524769648861 | -3.964106500820 |
| H | -1.850932825187  | -0.541608547721 | -5.475230625456 |
| O | -1.518600408698  | -2.242863381979 | -2.022507977074 |
| C | -7.185797207156  | -2.955257831189 | -5.877575326397 |
| H | -7.203206678921  | -3.939702284956 | -6.403270271937 |
| H | -7.337419033536  | -3.193640263618 | -4.803101812804 |
| C | -8.411619300549  | -2.132727672458 | -6.393293946596 |
| H | -8.261135362970  | -1.916863996135 | -7.473790550266 |
| H | -8.429310443520  | -1.144576257325 | -5.883120229372 |
| C | -9.736122938727  | -2.827275345878 | -6.261145859812 |
| C | -10.412405788838 | -3.563371614908 | -7.245221187783 |
| N | -10.539685573872 | -2.814447236980 | -5.115421433002 |
| C | -11.658877274490 | -3.989130031810 | -6.714590909286 |
| H | -10.038566014729 | -3.745559830609 | -8.264578963221 |
| C | -11.725710013254 | -3.499617620252 | -5.388666084955 |
| C | -12.862388204827 | -3.646428573592 | -4.416701034779 |
| H | -13.812846495889 | -3.387993401590 | -4.940810263285 |
| H | -12.774810843345 | -2.915321354371 | -3.584387435800 |
| C | -13.011303661510 | -5.072683271503 | -3.815685090516 |
| H | -13.575036276298 | -5.746370137764 | -4.499391179673 |
| H | -12.002707727381 | -5.546635745744 | -3.708944825762 |
| C | -13.612191982732 | -5.103668216643 | -2.399776444481 |
| C | -14.488869551849 | -6.294569754412 | -2.056759218110 |
| H | -14.729416207529 | -6.311360227452 | -0.973940989235 |
| H | -15.438501087852 | -6.234646900638 | -2.639243225421 |
| H | -14.003210031544 | -7.250790521455 | -2.359032833261 |
| O | -13.355282555668 | -4.222654501010 | -1.584590129567 |
| N | 9.840288024678   | -5.909300416555 | -2.714252282003 |
| C | 10.746583763665  | -5.683102018595 | -3.746955622653 |
| C | 8.813472227118   | -6.733765415161 | -3.174524303243 |
| C | 10.285369143279  | -6.381087809682 | -4.894396372388 |
| C | 9.082409372965   | -7.032687165032 | -4.521822251798 |
| H | 8.464494858477   | -7.673925262901 | -5.169109960715 |
| C | 11.987774468049  | -4.837795643684 | -3.637308298352 |
| H | 12.003639004639  | -4.142065863073 | -4.509716771890 |
| H | 11.961638660009  | -4.191207713207 | -2.733519518043 |
| C | 13.318490744603  | -5.627271816163 | -3.649824346769 |
| H | 13.358111917038  | -6.346809342152 | -4.501073158753 |
| H | 14.168903339825  | -4.924921413732 | -3.838730957537 |
| C | 13.654137623894  | -6.367227390941 | -2.348644044490 |
| C | 14.799555742271  | -7.364720249471 | -2.425672831772 |
| H | 15.122127608670  | -7.664021056094 | -1.407666519520 |
| H | 14.456475605314  | -8.274106691659 | -2.973425613500 |
| H | 15.663246460205  | -6.959361218831 | -2.999102005974 |
| O | 13.049515007772  | -6.155765105171 | -1.303270609616 |
| C | 7.651011192996   | -7.192027159493 | -2.342541090157 |
| H | 7.726598721116   | -6.816561574097 | -1.298619910571 |

|   |                  |                 |                 |
|---|------------------|-----------------|-----------------|
| H | 7.671429505587   | -8.304506807934 | -2.259186112813 |
| C | 6.262242511952   | -6.778820020334 | -2.932684851027 |
| H | 6.240182024370   | -5.673390211244 | -3.058326669817 |
| H | 6.180799783170   | -7.190560505215 | -3.965012122677 |
| C | 5.102111943317   | -7.281563516892 | -2.120515570428 |
| C | 4.615508222385   | -8.598919660295 | -2.055386765171 |
| N | 4.415784751753   | -6.519092254578 | -1.167444846413 |
| C | 3.611473960100   | -8.623138387661 | -1.040858981364 |
| C | 3.497326642479   | -7.340323557663 | -0.501718314373 |
| H | 3.029554704572   | -9.501959907666 | -0.722056498262 |
| C | 4.544966905817   | -5.078979156974 | -0.971875483246 |
| H | 4.389977464168   | -4.842096910595 | 0.104856550972  |
| H | 5.595983433538   | -4.781623538793 | -1.185055914417 |
| C | 2.537300499970   | -6.843187271091 | 0.533845683352  |
| H | 2.375733939212   | -7.643856729034 | 1.290020205222  |
| H | 2.960374537333   | -5.976481244898 | 1.091516573245  |
| C | 1.133522464484   | -6.428229257373 | -0.052366348748 |
| H | 1.292241508551   | -5.848770772053 | -0.990652878258 |
| H | 0.556306608935   | -7.338533950521 | -0.323682129533 |
| C | 0.366950031317   | -5.531357299623 | 0.895868542047  |
| C | -0.910939040577  | -6.061151633990 | 1.507808416367  |
| C | -1.580284533726  | -5.217204548679 | 2.615549155440  |
| H | -1.526488281830  | -4.143644450285 | 2.331966649066  |
| H | -0.969123356852  | -5.306206011575 | 3.546030351578  |
| C | -3.005632753465  | -5.615847732723 | 2.902478288589  |
| C | -3.478048557905  | -6.792884374003 | 3.492657035684  |
| N | -4.116114364974  | -4.809074000088 | 2.600973528861  |
| C | -4.906496678392  | -6.689579763929 | 3.543449702530  |
| C | -5.286840305879  | -5.463632434351 | 2.998562654104  |
| H | -5.584987599929  | -7.444533930094 | 3.966174088263  |
| C | -4.056500834404  | -3.497977411163 | 1.977121785621  |
| H | -3.240666031426  | -2.892861814907 | 2.437766769952  |
| H | -4.996649756375  | -2.942950533577 | 2.188758440393  |
| H | -1.613205303226  | -6.216743039913 | 0.647123659944  |
| H | -0.716201203256  | -7.104678225326 | 1.856533187189  |
| O | 0.819460283810   | -4.392676432302 | 1.134470725992  |
| C | -6.653606570165  | -4.832174849889 | 2.901873332093  |
| H | -6.702743986371  | -3.912314591784 | 3.537139438986  |
| H | -6.864181358094  | -4.481733045086 | 1.863411080555  |
| C | -7.792381316425  | -5.788552754691 | 3.343982114359  |
| H | -7.565757226045  | -6.147129555127 | 4.373911847191  |
| H | -7.773806012465  | -6.699394368374 | 2.700069368029  |
| C | -9.162652174504  | -5.177468164940 | 3.377570200974  |
| C | -9.797456647945  | -4.548317368430 | 4.476405510701  |
| N | -10.063705211949 | -5.189217572189 | 2.311819064949  |
| C | -11.101887744626 | -4.186873458620 | 4.045883823818  |
| C | -11.260930118011 | -4.591960246868 | 2.712054508891  |
| H | -11.878901587173 | -3.697675100347 | 4.652451821567  |
| C | -12.476465240210 | -4.520695682848 | 1.842476186431  |
| H | -12.882547474950 | -5.535117029036 | 1.609553702060  |
| H | -13.278797120197 | -3.964555869843 | 2.369722185272  |
| H | -12.313074275050 | -4.018159992769 | 0.862317683940  |
| C | -9.802867585397  | -5.670489481129 | 0.955291533718  |
| H | -9.003314649902  | -6.443909227916 | 0.999169372908  |
| H | -10.715436864701 | -6.195414457181 | 0.589243418435  |
| C | -9.422509955961  | -4.554595753873 | -0.043950094715 |

|   |                  |                 |                 |
|---|------------------|-----------------|-----------------|
| H | -10.205617788354 | -3.764491932814 | 0.001236009085  |
| H | -8.473725158748  | -4.065577129102 | 0.285548555371  |
| C | -9.286536227535  | -5.077597282327 | -1.485623526329 |
| H | -10.215498344876 | -5.642539173532 | -1.746078901085 |
| H | -8.460522727182  | -5.827928035780 | -1.536938982058 |
| C | -9.059141830018  | -3.995074572581 | -2.564528672666 |
| H | -9.020541336195  | -4.503683276769 | -3.557090840977 |
| H | -8.053485039717  | -3.525186981296 | -2.423064608951 |
| C | -10.146907017172 | -2.902282354117 | -2.587823336741 |
| H | -11.135240209381 | -3.358302910827 | -2.352714702666 |
| H | -9.972952086657  | -2.170292284680 | -1.764275507811 |
| C | -10.249551903093 | -2.064587068242 | -3.881470239472 |
| H | -11.039380616418 | -1.288709710009 | -3.741506598456 |
| H | -9.302051103367  | -1.506611599146 | -4.040490201020 |
| C | -3.820203712881  | -3.538466017256 | 0.446648986947  |
| H | -2.949573212537  | -4.218635889332 | 0.246681929521  |
| C | 3.546077497345   | -4.203634740106 | -1.819261365819 |
| H | 2.842344425089   | -4.920681936381 | -2.322745830334 |
| C | 4.251733001396   | -3.382792846813 | -2.901097691678 |
| H | 3.525453100883   | -2.776242707863 | -3.484539890181 |
| H | 4.791664769479   | -4.042836628132 | -3.613765820455 |
| C | 3.970108887053   | 1.267308456496  | -3.240098186460 |
| C | 1.822416331616   | 0.517680329088  | -3.367021536010 |
| C | 2.133630431420   | 1.104367745203  | -4.608973454567 |
| H | 4.042788858574   | 2.092974609530  | -5.302159401631 |
| C | 3.478487347328   | 1.567866537214  | -4.516373828409 |
| N | 2.956725774580   | 0.598990432539  | -2.549896110940 |
| C | 3.000421439744   | 0.230092250464  | -1.134240989799 |
| H | 4.056457762475   | 0.011073545680  | -0.861274380726 |
| H | 2.455367700264   | -0.728539698173 | -0.984002939892 |
| C | 2.449423525199   | 1.327176199281  | -0.181514078536 |
| H | 1.359866439741   | 1.478458086112  | -0.422208194461 |
| C | 2.564670756302   | 0.883000067048  | 1.279167716234  |
| H | 2.188843904441   | 1.682903732303  | 1.952545781627  |
| H | 1.975346791313   | -0.041977631604 | 1.462762673167  |
| C | -3.766023852100  | -1.463305634511 | -5.661540545362 |
| C | -5.836314627889  | -2.326300879894 | -6.108735081954 |
| C | -5.160700145455  | -2.180873786556 | -7.335104064841 |
| H | -3.072065113617  | -1.439468954661 | -7.772659685189 |
| C | -3.870099039538  | -1.647105419751 | -7.042898890509 |
| N | -4.978405799753  | -1.876097452224 | -5.091993585602 |
| C | -5.320871183892  | -1.773224436620 | -3.676803371635 |
| H | -6.030196583138  | -2.593426776886 | -3.429534884308 |
| H | -4.405964525629  | -1.960194286834 | -3.067884141111 |
| C | -5.967442281308  | -0.424124031827 | -3.228369081954 |
| H | -6.304542611976  | -0.598652193700 | -2.175879960193 |
| C | -5.020047999243  | 0.784736310137  | -3.233132460458 |
| H | -4.633751798903  | 1.000341616117  | -4.256435385288 |
| H | -5.562671917485  | 1.686814993407  | -2.877150728344 |
| H | -4.146950833672  | 0.629747185792  | -2.558874899239 |
| H | 3.626864817287   | 0.685733849249  | 1.549762483755  |
| H | 4.989116051011   | -2.682704567362 | -2.446485555169 |
| C | -5.017219868325  | -4.058293010284 | -0.352333138736 |
| H | -5.909768247044  | -3.406417367335 | -0.215629960893 |
| H | -4.782539665387  | -4.109556254375 | -1.440157614078 |
| H | -5.283134558324  | -5.089150526181 | -0.029533885238 |

|    |                  |                  |                 |
|----|------------------|------------------|-----------------|
| O  | -7.159774677161  | -0.146969087361  | -3.958962985753 |
| H  | -6.897264954923  | 0.150424691970   | -4.857308190301 |
| O  | 3.155316369514   | 2.557800458445   | -0.315936188887 |
| H  | 2.985975752628   | 2.912713924927   | -1.214525859607 |
| O  | 2.816818284596   | -3.273579470849  | -1.000626706591 |
| H  | 2.324869684626   | -3.760598287440  | -0.298028330301 |
| O  | -3.466977237486  | -2.183277237439  | 0.073418881904  |
| H  | -3.532375606225  | -2.125522912425  | -0.905289017049 |
| C  | 8.729104484744   | 1.777825353339   | -4.498163993554 |
| H  | 8.264325759533   | 0.957427657230   | -5.090263752718 |
| H  | 8.163555810530   | 2.710202724748   | -4.737163251760 |
| H  | 9.760801830538   | 1.924212096935   | -4.884730262844 |
| C  | 1.226318611064   | 1.210634303730   | -5.805626052532 |
| H  | 1.204529045527   | 0.271786999255   | -6.409562253483 |
| H  | 0.173181248110   | 1.439543248774   | -5.520824837801 |
| H  | 1.559939461968   | 2.020324730622   | -6.489516482818 |
| C  | -5.687945576251  | -2.546468238174  | -8.697322331983 |
| H  | -6.357704472981  | -3.434970979777  | -8.662851222125 |
| H  | -6.272603654058  | -1.717587541373  | -9.161415999428 |
| H  | -4.858574882256  | -2.784037399458  | -9.398142924862 |
| C  | -12.716708790548 | -4.791564029847  | -7.420442652835 |
| H  | -12.652303054553 | -5.879299261506  | -7.179226064838 |
| H  | -13.745398609438 | -4.461783526476  | -7.149847086130 |
| H  | -12.619111554993 | -4.700994893387  | -8.523663096807 |
| C  | 10.953765249461  | -6.424607737324  | -6.240510156489 |
| H  | 11.774880754463  | -7.179484656892  | -6.281338734431 |
| H  | 10.229860093143  | -6.698636207830  | -7.037846716043 |
| H  | 11.404797036878  | -5.445531094183  | -6.520127604527 |
| C  | 5.097835397039   | -9.772914280569  | -2.864908058916 |
| H  | 5.448252973948   | -9.471300638749  | -3.877322536723 |
| H  | 5.946944260210   | -10.304516805222 | -2.373328507349 |
| H  | 4.290587176891   | -10.524526070786 | -3.005079520729 |
| C  | -2.651080884655  | -7.949124506920  | 3.990550729632  |
| H  | -2.531041831338  | -8.749865736833  | 3.222097948010  |
| H  | -1.629060383587  | -7.635904560833  | 4.302672779075  |
| H  | -3.124498444254  | -8.430472944136  | 4.874157263272  |
| C  | -9.201284574913  | -4.332458365814  | 5.840419234759  |
| H  | -8.755930730218  | -5.265141070378  | 6.258196026846  |
| H  | -8.391166318930  | -3.565328609632  | 5.834683710726  |
| H  | -9.971842200372  | -3.985345803813  | 6.560916693598  |
| Cu | -0.975027737711  | -1.949516196502  | -0.221277735140 |
| O  | -0.090106922399  | -1.937962789592  | 1.526182103706  |
| H  | 0.283757286500   | -2.867355317750  | 1.672742091045  |
| H  | -0.547750710157  | -1.663234920236  | 2.349188903942  |

## BA-Cu(II)

|   |                |                |                 |
|---|----------------|----------------|-----------------|
| C | 5.411757292665 | 2.169560314471 | -1.968578252392 |
| C | 5.032226020208 | 2.560506756553 | -3.262348697554 |
| C | 6.238531891026 | 2.777757721168 | -4.004563693763 |
| C | 7.324197257197 | 2.518493326531 | -3.167172210691 |
| N | 6.810546628213 | 2.157105551362 | -1.923025589139 |
| H | 6.309353907429 | 3.104287275548 | -5.053422150303 |
| C | 8.793306529802 | 2.588742678835 | -3.461668737589 |
| H | 9.333316455142 | 3.300107865009 | -2.793281745495 |
| H | 9.307831234054 | 1.602313561561 | -3.374021074434 |

|   |                  |                 |                 |
|---|------------------|-----------------|-----------------|
| H | 8.945315153689   | 2.943540811836  | -4.502410415540 |
| C | 7.619419607471   | 1.666894908347  | -0.807534188444 |
| H | 8.602136495324   | 2.189609972991  | -0.832027570621 |
| H | 7.142018398235   | 1.973090050592  | 0.151291375900  |
| C | 7.836008669906   | 0.140549001961  | -0.831894603569 |
| H | 6.844510491995   | -0.370639948558 | -0.761873141455 |
| H | 8.249891988742   | -0.137619683518 | -1.829401962254 |
| C | 8.762984004999   | -0.359467956764 | 0.290138513469  |
| H | 9.779115322421   | 0.085710128369  | 0.156133957731  |
| H | 8.395683984436   | 0.026396438102  | 1.271728487891  |
| C | 8.881470250626   | -1.894385716070 | 0.380004751940  |
| H | 9.505130473866   | -2.155801440008 | 1.267420199897  |
| H | 7.871312124299   | -2.328199726003 | 0.587070423472  |
| C | 9.473752434326   | -2.574190763223 | -0.867954852271 |
| H | 8.844137369579   | -2.359701977180 | -1.764716793328 |
| H | 10.480143748114  | -2.146594179610 | -1.094671500859 |
| C | 9.589702403068   | -4.100478617401 | -0.692438828827 |
| H | 8.600832750606   | -4.527406981931 | -0.410414656907 |
| H | 10.272469729068  | -4.367509521110 | 0.143525832708  |
| C | 4.544825907929   | 1.984224454999  | -0.753898478415 |
| H | 4.802296827275   | 1.046837049247  | -0.201265421700 |
| H | 3.499581150096   | 1.841712529699  | -1.107463676629 |
| C | 4.571654621617   | 3.213035611649  | 0.236201374370  |
| H | 5.286045812305   | 3.012781772287  | 1.068962625531  |
| H | 4.997312008798   | 4.082244555463  | -0.311048882709 |
| C | 0.224033702874   | 3.232482260659  | 2.928052114402  |
| H | 0.420009490326   | 2.181248369541  | 3.231472476832  |
| H | 0.254799807996   | 3.818379249970  | 3.878666010915  |
| C | -1.210548247888  | 3.323920084398  | 2.366166077843  |
| H | -1.534892331806  | 4.379136251684  | 2.234119310088  |
| H | -1.937612710246  | 2.910983808667  | 3.113477980888  |
| C | -1.445316182191  | 2.574003865826  | 1.068933223402  |
| C | -2.587229051514  | 3.004721485747  | 0.167864851394  |
| H | -2.156415928136  | 3.190428796653  | -0.845721005464 |
| H | -3.023446672801  | 3.966215009741  | 0.516345723704  |
| C | -3.696639093401  | 1.929339879196  | 0.065367606125  |
| H | -3.234050953311  | 0.967429480668  | -0.264059789648 |
| H | -4.099907397113  | 1.731795802370  | 1.088243530959  |
| O | -0.722945565071  | 1.595920038544  | 0.768471684581  |
| C | -8.127863208614  | 1.654291383785  | -2.395537178142 |
| H | -8.278662739870  | 1.908320773197  | -3.468439133714 |
| H | -8.176211539877  | 0.543341118430  | -2.344740414592 |
| C | -9.336153666095  | 2.263774965610  | -1.592881139359 |
| H | -9.169960035517  | 3.362909279838  | -1.529489231548 |
| H | -9.308139001322  | 1.896452220597  | -0.542579083728 |
| C | -10.683116524200 | 2.049846886988  | -2.220024061234 |
| C | -11.238198512643 | 2.798817453998  | -3.270759165680 |
| N | -11.627199589415 | 1.085688202294  | -1.853393013040 |
| C | -12.539579830725 | 2.309674334330  | -3.542845252022 |
| H | -10.745418120162 | 3.647256731185  | -3.770369993810 |
| C | -12.768153446470 | 1.233027508353  | -2.644908474874 |
| C | -14.041636173678 | 0.457310040085  | -2.415641956057 |
| H | -14.782540002210 | 1.130954708980  | -1.915813975065 |
| H | -13.869462622439 | -0.373933590326 | -1.699807081544 |
| C | -14.724217586361 | -0.112245910796 | -3.677887740935 |
| H | -15.697948931982 | -0.579391117152 | -3.385505263618 |

|   |                  |                 |                 |
|---|------------------|-----------------|-----------------|
| H | -15.015286606922 | 0.689806925729  | -4.392792714169 |
| C | -13.940649795753 | -1.191844034019 | -4.432120697547 |
| C | -14.440520401820 | -1.519834671504 | -5.831392517261 |
| H | -13.965028707140 | -2.448837718112 | -6.206678850044 |
| H | -15.549138987478 | -1.617098141236 | -5.861077373044 |
| H | -14.180569473970 | -0.681243620615 | -6.519909627145 |
| O | -12.976134937828 | -1.763797332689 | -3.936914966090 |
| N | 10.058311956375  | -4.798841797408 | -1.893954938697 |
| C | 11.386950879676  | -5.072202595741 | -2.202807798733 |
| C | 9.238945490144   | -5.259288214099 | -2.926669125728 |
| C | 11.416722949447  | -5.727342518693 | -3.463894105462 |
| C | 10.072746239008  | -5.838264347225 | -3.900211398885 |
| H | 9.732423373193   | -6.296214582465 | -4.841392950599 |
| C | 12.564009055489  | -4.702210901788 | -1.340531997010 |
| H | 13.311928291422  | -4.187427052204 | -1.989479364840 |
| H | 12.276309288414  | -3.962753842613 | -0.562202499071 |
| C | 13.281443623980  | -5.893933825519 | -0.663602392075 |
| H | 13.532802356117  | -6.690940033499 | -1.402056598969 |
| H | 14.272789879673  | -5.557973211249 | -0.268057571737 |
| C | 12.536271082665  | -6.520059726401 | 0.521549255909  |
| C | 13.071373243261  | -7.855421262608 | 1.015163881961  |
| H | 12.628722534983  | -8.110264391058 | 1.999551573295  |
| H | 12.799162916634  | -8.652122657607 | 0.283153201144  |
| H | 14.182573774500  | -7.856253302430 | 1.081512268879  |
| O | 11.575343030179  | -5.972411401336 | 1.050885050609  |
| C | 7.746537110455   | -5.104104035372 | -2.952532019192 |
| H | 7.390457192003   | -4.507919354868 | -2.083977034146 |
| H | 7.254913381670   | -6.101314530247 | -2.851051048172 |
| C | 7.223555351573   | -4.435600826501 | -4.271310652578 |
| H | 7.821852693538   | -3.520434739845 | -4.466804319380 |
| H | 7.442179891168   | -5.117181975976 | -5.124796792536 |
| C | 5.752525688684   | -4.142989192961 | -4.248623978381 |
| C | 4.691618752226   | -5.049651174687 | -4.433768328363 |
| N | 5.203757174085   | -2.899703943966 | -3.918033014023 |
| C | 3.482183120696   | -4.323564113765 | -4.217546586642 |
| C | 3.814110404484   | -2.999992317845 | -3.900686980090 |
| H | 2.467521697603   | -4.741972989361 | -4.292810776194 |
| C | 5.930395875441   | -1.632494665665 | -3.768750318328 |
| H | 5.423498253136   | -1.038785411966 | -2.975000609097 |
| H | 6.944862882625   | -1.856017897983 | -3.370943533770 |
| C | 2.923407129047   | -1.833711016555 | -3.555382188619 |
| H | 3.225078953208   | -1.384985944484 | -2.576714684484 |
| H | 3.033479037899   | -1.000915202048 | -4.293234657133 |
| C | 1.449791463064   | -2.247103150969 | -3.477020932750 |
| H | 1.074208289771   | -2.611575151130 | -4.464075071354 |
| H | 1.339642740775   | -3.139907114716 | -2.808023242998 |
| C | 0.478705820051   | -1.214874531022 | -2.940013603949 |
| C | -0.995256736555  | -1.567401830471 | -3.053146408421 |
| C | -1.970393790836  | -0.773175314333 | -2.150283967398 |
| H | -2.070960955494  | 0.265150094860  | -2.540865009950 |
| H | -1.516423390766  | -0.675201823003 | -1.134383731666 |
| C | -3.344723414982  | -1.375692616681 | -2.062053943495 |
| C | -4.476827667684  | -1.104201461702 | -2.847203625334 |
| N | -3.671936656422  | -2.401061175472 | -1.165172464362 |
| C | -5.509193299534  | -1.980910585125 | -2.390519266762 |
| C | -5.005559878851  | -2.763162258712 | -1.344284440045 |



|   |                  |                 |                 |
|---|------------------|-----------------|-----------------|
| H | -6.533883011648  | -2.036615563483 | -2.790996753107 |
| C | -2.789902057720  | -2.889675884213 | -0.105045027164 |
| H | -1.746070377616  | -2.909293633032 | -0.494583144596 |
| H | -3.044288988242  | -3.951858358751 | 0.110951606886  |
| H | -1.274336694140  | -1.431566736712 | -4.128576069715 |
| H | -1.103453192304  | -2.666518784052 | -2.891517697106 |
| O | 0.883251817453   | -0.157464427103 | -2.420565869148 |
| C | -5.718265568658  | -3.824863939904 | -0.553863572159 |
| H | -5.193996184502  | -4.057636926778 | 0.399834827768  |
| H | -6.708911442787  | -3.422406205264 | -0.243788361255 |
| C | -5.955258958036  | -5.157853411166 | -1.347431153092 |
| H | -4.973215826268  | -5.668740166225 | -1.480607294291 |
| H | -6.292068417901  | -4.895286741746 | -2.375079919481 |
| C | -6.916660220427  | -6.099653773107 | -0.687409815755 |
| C | -6.670449338339  | -7.010301422260 | 0.366399653532  |
| N | -8.275724685913  | -6.168955921760 | -1.004577126000 |
| C | -7.912910429400  | -7.629852400397 | 0.674584940794  |
| C | -8.895396909453  | -7.101774712669 | -0.176553447607 |
| H | -8.089300642347  | -8.404637388763 | 1.435934907801  |
| C | -10.349562332166 | -7.442733844041 | -0.273718707757 |
| H | -10.617777794441 | -7.894560330321 | -1.258539302121 |
| H | -10.613703858925 | -8.183648635541 | 0.508813952383  |
| H | -11.011947194763 | -6.556629574530 | -0.131471206517 |
| C | -8.959584643663  | -5.358015589396 | -2.015019361932 |
| H | -8.271056942960  | -5.220507894561 | -2.880003582550 |
| H | -9.821047053368  | -5.941486061997 | -2.409006959057 |
| C | -9.429538984475  | -3.982851652782 | -1.496661716304 |
| H | -10.234602492956 | -4.131581989965 | -0.738918592064 |
| H | -8.583999423065  | -3.507242526339 | -0.945724339844 |
| C | -9.889258925161  | -3.031985233646 | -2.616884515827 |
| H | -10.830823922982 | -3.397976504280 | -3.090284251421 |
| H | -9.122563542948  | -3.041829951883 | -3.429931678178 |
| C | -10.084624333738 | -1.572488405517 | -2.159836538533 |
| H | -10.247141359400 | -0.938444117343 | -3.061200877194 |
| H | -9.134028085417  | -1.213264865614 | -1.690722772460 |
| C | -11.252944509851 | -1.352641666163 | -1.186569232199 |
| H | -12.177182021948 | -1.747619614391 | -1.662973790353 |
| H | -11.101160349091 | -1.934163125090 | -0.246006292509 |
| C | -11.469298384961 | 0.115219689015  | -0.759090261588 |
| H | -12.358210807393 | 0.183850779593  | -0.090079252262 |
| H | -10.607686400703 | 0.456140411833  | -0.144370285473 |
| C | -2.843535287188  | -2.051364340888 | 1.188680094282  |
| H | -2.695889127469  | -0.976384050613 | 0.927382688698  |
| H | -3.867688809715  | -2.117715671711 | 1.629955897070  |
| C | -1.790486717916  | -2.472225267761 | 2.228241726565  |
| H | -1.946338999934  | -3.540546230035 | 2.512766922312  |
| H | -0.780349011322  | -2.432610955318 | 1.750981343269  |
| C | -1.801506031894  | -1.594667480653 | 3.489797718382  |
| H | -2.787674087974  | -1.632230943764 | 4.005465287571  |
| H | -1.034090308603  | -1.919981307875 | 4.226550085713  |
| H | -1.604036519412  | -0.524403362659 | 3.243116167482  |
| C | 6.018795000640   | -0.781331765741 | -5.056309847790 |
| H | 4.999875735825   | -0.720610972136 | -5.505687575425 |
| H | 6.271650839252   | 0.260716604920  | -4.748121367851 |
| C | 7.026203108127   | -1.256175044701 | -6.123167982848 |
| H | 6.816943565841   | -0.700755306756 | -7.066907648359 |

|   |                  |                 |                 |
|---|------------------|-----------------|-----------------|
| H | 6.843719876839   | -2.328552616661 | -6.374848123822 |
| C | 8.499616888567   | -1.035980896754 | -5.740366567504 |
| H | 9.185063727305   | -1.387836682004 | -6.542361367725 |
| H | 8.712614561609   | 0.043764242899  | -5.568088917445 |
| H | 8.792755485701   | -1.577714130937 | -4.810311372566 |
| C | 3.239484136946   | 3.667227841657  | 0.766281286222  |
| C | 1.290510262579   | 3.704248251718  | 1.965089804387  |
| C | 1.289620967058   | 4.839149013229  | 1.136482901654  |
| H | 2.857766465807   | 5.561383954331  | -0.334710023181 |
| C | 2.506186015695   | 4.793693360043  | 0.373294174638  |
| N | 2.489229074130   | 3.007020718220  | 1.735952449609  |
| C | 2.981525891825   | 1.839205755281  | 2.477660833520  |
| H | 3.488476177329   | 1.165093568078  | 1.750834525386  |
| H | 2.105771049525   | 1.268872943659  | 2.860165403023  |
| C | 3.948042690543   | 2.174147928156  | 3.637394093019  |
| H | 4.416201964072   | 1.214900549981  | 3.967309947940  |
| H | 4.781423056786   | 2.793399417935  | 3.232619327839  |
| C | 3.326778357592   | 2.884451188078  | 4.857568622590  |
| H | 4.159134682121   | 3.276701296838  | 5.486292872974  |
| H | 2.770875334957   | 3.791629998194  | 4.519386446476  |
| C | 2.428207347691   | 1.991718975182  | 5.729015880658  |
| H | 2.020281562678   | 2.555249052075  | 6.596571036297  |
| H | 1.553952897201   | 1.581461732005  | 5.173106824343  |
| H | 2.994877023777   | 1.123805860481  | 6.136650882039  |
| C | -4.798254844181  | 2.329308586671  | -0.878791798057 |
| C | -6.777193582779  | 2.164599189883  | -1.992982718586 |
| C | -6.066275095416  | 3.243051842083  | -2.554631961895 |
| H | -4.035068790676  | 4.073921871710  | -2.048386795043 |
| C | -4.827338419051  | 3.336381541014  | -1.850935357007 |
| N | -5.997987877595  | 1.627191276762  | -0.964685117270 |
| C | -6.367217527958  | 0.508792069399  | -0.095140333097 |
| H | -7.108433299231  | -0.112945486688 | -0.640030696398 |
| H | -5.477237013242  | -0.149600605437 | 0.029115532886  |
| C | -6.916487484383  | 0.928033594571  | 1.285569908897  |
| H | -6.189349172201  | 1.617143423387  | 1.775569955201  |
| H | -7.846071952839  | 1.530913429984  | 1.149169430561  |
| C | -7.192935293210  | -0.265297269242 | 2.223843250897  |
| H | -6.257069248717  | -0.867758858326 | 2.334427964897  |
| H | -7.409931502392  | 0.131413116477  | 3.242667504166  |
| C | -8.347116414755  | -1.183341755113 | 1.789649624531  |
| H | -8.165580086839  | -1.663624251298 | 0.801319610608  |
| H | -8.508790762940  | -2.003713562074 | 2.522886107716  |
| H | -9.304573376805  | -0.618452914950 | 1.713056240294  |
| C | 3.632017692137   | 2.756676042316  | -3.786624166185 |
| H | 2.948038287838   | 1.927487560988  | -3.484086258437 |
| H | 3.186126649517   | 3.729842419235  | -3.459813169879 |
| H | 3.623680940135   | 2.778465529606  | -4.897995013958 |
| C | 0.269452521506   | 5.948948076225  | 1.059478650196  |
| H | -0.606023985024  | 5.704293918387  | 0.411603398929  |
| H | -0.126832824392  | 6.229516820162  | 2.060704694153  |
| H | 0.728979214883   | 6.865395785763  | 0.630382835881  |
| C | -6.529005676543  | 4.130506041653  | -3.679300553850 |
| H | -6.961616018396  | 3.548400926504  | -4.525194344573 |
| H | -7.313418145963  | 4.854541560434  | -3.354687626084 |
| H | -5.687760786909  | 4.729554338304  | -4.089386963801 |
| C | -13.495055858861 | 2.886209266611  | -4.553462274580 |

|    |                  |                 |                 |
|----|------------------|-----------------|-----------------|
| H  | -13.147119100143 | 3.884969492776  | -4.893561911405 |
| H  | -13.588635582836 | 2.252621691632  | -5.466888430316 |
| H  | -14.520886196610 | 3.019989495223  | -4.140808363824 |
| C  | 12.642520187395  | -6.205430318140 | -4.191005727980 |
| H  | 12.987254168495  | -7.203493290967 | -3.829142498746 |
| H  | 12.445564516804  | -6.312154628891 | -5.279339595732 |
| H  | 13.502025677050  | -5.507364746483 | -4.073249033369 |
| C  | 4.814603639510   | -6.511643680141 | -4.768087289991 |
| H  | 5.670837684181   | -6.716380586404 | -5.449591060814 |
| H  | 4.967798765205   | -7.144217813872 | -3.860983316326 |
| H  | 3.897234399293   | -6.888721519137 | -5.270250909700 |
| C  | -4.579477995153  | -0.085551863987 | -3.952379052698 |
| H  | -5.614873494507  | -0.037659666178 | -4.351617827219 |
| H  | -4.321777666384  | 0.941411487927  | -3.603564855570 |
| H  | -3.912244330885  | -0.321354359255 | -4.814317873842 |
| C  | -5.345739183190  | -7.257036737421 | 1.035363146334  |
| H  | -4.491753578624  | -7.156926473484 | 0.327354681406  |
| H  | -5.158888093972  | -6.545641721849 | 1.875729930605  |
| H  | -5.297823686235  | -8.279956700483 | 1.467832416409  |
| Cu | 0.376478457567   | 1.076317948379  | -0.857078871873 |
| O  | 1.075428432656   | -0.616648256911 | 0.551956749879  |
| H  | 1.966740291725   | -1.005416493803 | 0.678581086290  |
| H  | 0.755810019653   | -0.421316364227 | 1.459197012631  |
| O  | 0.943016254926   | 2.975486497452  | -1.570734680907 |
| H  | 1.545794735678   | 2.996837571495  | -2.347461636050 |
| H  | 1.377350214722   | 3.593465912794  | -0.910620406445 |

## DAP-Cu(II)

|   |                 |                 |                 |
|---|-----------------|-----------------|-----------------|
| C | 15.934222965111 | 6.939302918442  | 1.656388335113  |
| C | 16.578511261080 | 8.072377164784  | 1.089119928375  |
| C | 17.942691196869 | 7.992928196044  | 1.459886026987  |
| C | 18.126114389705 | 6.840072908794  | 2.245527639301  |
| N | 16.890772335436 | 6.202742972358  | 2.355004098300  |
| H | 18.736483055403 | 8.708815387054  | 1.198651734449  |
| C | 19.378303863036 | 6.361693645157  | 2.908573003289  |
| H | 19.259245701349 | 6.253890596926  | 4.012652407619  |
| H | 19.729516938653 | 5.377274924591  | 2.522064466838  |
| H | 20.192437742926 | 7.095043872381  | 2.734619183903  |
| C | 16.647445496315 | 4.930374939149  | 3.051828461115  |
| H | 17.433255892922 | 4.819093981006  | 3.831878377013  |
| H | 15.682996981544 | 4.998062666561  | 3.601543141609  |
| C | 16.608773278350 | 3.670584148568  | 2.162451365130  |
| H | 16.271377154907 | 2.841966680594  | 2.831134357310  |
| H | 15.791504631257 | 3.784625515919  | 1.411621755363  |
| C | 17.929049053622 | 3.291590493294  | 1.464005864379  |
| H | 18.173608438612 | 4.046383337781  | 0.677978882240  |
| H | 18.760748857880 | 3.342979701445  | 2.206438305308  |
| C | 17.937074400930 | 1.874312937021  | 0.852815857915  |
| H | 18.952092339056 | 1.661402894505  | 0.441532063316  |
| H | 17.787672464870 | 1.132232157344  | 1.676880213697  |
| C | 16.879968056090 | 1.620027347044  | -0.236397294622 |
| H | 15.863826834104 | 1.851106631619  | 0.156049784572  |
| H | 17.034076515732 | 2.319184927040  | -1.092701324841 |
| C | 16.893139815826 | 0.157081167950  | -0.734217795733 |
| H | 17.004104588700 | -0.530308360603 | 0.133584565262  |

|   |                 |                 |                 |
|---|-----------------|-----------------|-----------------|
| H | 17.764117022964 | -0.044093365207 | -1.396598858573 |
| C | 14.473178426226 | 6.626126838747  | 1.644226568934  |
| H | 14.293703494852 | 5.544557812356  | 1.444733859365  |
| H | 14.004367210963 | 7.175892894248  | 0.799291611044  |
| C | 13.730539792412 | 7.049414125855  | 2.972675180062  |
| H | 14.134569424121 | 6.444168353875  | 3.817037809167  |
| H | 14.008242954383 | 8.102428368942  | 3.196088800443  |
| C | 9.046478127600  | 5.062366862967  | 2.880461416946  |
| H | 9.383147227199  | 4.096150531973  | 3.314345889603  |
| H | 8.224587902613  | 5.421726355910  | 3.544364808651  |
| C | 8.462502177771  | 4.800160775209  | 1.450849962348  |
| H | 9.261991392999  | 4.402671206887  | 0.787451930669  |
| H | 8.109777818585  | 5.767238207702  | 1.024724838028  |
| C | 7.314920821136  | 3.792488963863  | 1.493354974036  |
| C | 5.936635482249  | 4.349413601824  | 1.866514706403  |
| H | 5.624166511319  | 5.049968007125  | 1.051997984536  |
| H | 6.046439414412  | 5.009841306100  | 2.760776092833  |
| C | 4.872344863796  | 3.263443549221  | 2.132944271310  |
| H | 4.731614354927  | 2.665412581083  | 1.201960093666  |
| H | 5.296101395384  | 2.541619932190  | 2.866279650093  |
| O | 7.492961032434  | 2.594014598519  | 1.283355308603  |
| C | 0.287680824077  | 5.512083095097  | 2.343037017080  |
| H | 0.181618184097  | 6.476248817299  | 2.894765761674  |
| H | 0.376710741232  | 5.801080941641  | 1.271773483695  |
| C | -1.006445873395 | 4.686612281688  | 2.537154173201  |
| H | -1.144085522042 | 4.501588087086  | 3.631711795029  |
| H | -0.848816508124 | 3.672040681334  | 2.092951961516  |
| C | -2.229049963563 | 5.340040397475  | 1.951315117494  |
| C | -2.359119173701 | 6.562075907483  | 1.281589944522  |
| N | -3.502339066962 | 4.772633314726  | 2.034845376285  |
| C | -3.735485957940 | 6.750063972821  | 0.949550374204  |
| H | -1.546392776976 | 7.272315746063  | 1.069067209496  |
| C | -4.429482968516 | 5.622098815669  | 1.425761556269  |
| C | -5.893409055928 | 5.301413202168  | 1.305489720188  |
| H | -6.490241184985 | 6.160245528165  | 1.694142601864  |
| H | -6.162017073184 | 4.434526627969  | 1.948497073813  |
| C | -6.368665433049 | 4.985068683871  | -0.140061845148 |
| H | -6.679703759868 | 5.905420638701  | -0.683874918817 |
| H | -5.519125503166 | 4.568543507200  | -0.738271025529 |
| C | -7.467296874535 | 3.907209617361  | -0.213798970014 |
| C | -8.481149922363 | 4.044840784383  | -1.336486789324 |
| H | -9.114404421897 | 3.137261092106  | -1.409499413646 |
| H | -9.132409191807 | 4.928595506205  | -1.137863640634 |
| H | -7.979052062400 | 4.244370369804  | -2.310919416448 |
| O | -7.491224716305 | 2.973484175119  | 0.580077053285  |
| N | 15.673651234864 | -0.239585530134 | -1.450919144028 |
| C | 15.383273489727 | 0.062312235688  | -2.777153686616 |
| C | 14.590408604260 | -0.914967236609 | -0.881869533377 |
| C | 14.081878720682 | -0.425606708948 | -3.062707877651 |
| C | 13.602116785582 | -1.034483441141 | -1.872802067833 |
| H | 12.626641351656 | -1.524362616889 | -1.732651404242 |
| C | 16.325807690046 | 0.766958667659  | -3.717240666308 |
| H | 15.770130308582 | 1.600913907618  | -4.208529404205 |
| H | 17.163132118281 | 1.241823215756  | -3.162237576506 |
| C | 16.912759678666 | -0.125691302144 | -4.836041098450 |
| H | 16.111042055937 | -0.667555864765 | -5.390583503527 |

|   |                 |                 |                 |
|---|-----------------|-----------------|-----------------|
| H | 17.402619474281 | 0.517122270646  | -5.610139062729 |
| C | 17.977553404780 | -1.131627128789 | -4.378768873780 |
| C | 18.348177456036 | -2.212346563656 | -5.383449248904 |
| H | 19.277228633956 | -2.730641761348 | -5.070037856301 |
| H | 17.522121094349 | -2.960466740681 | -5.435426236155 |
| H | 18.465527033956 | -1.800102084417 | -6.410765607286 |
| O | 18.509093577476 | -1.063418794921 | -3.276747333424 |
| C | 14.565373875862 | -1.416745167896 | 0.529193434274  |
| H | 15.521314762695 | -1.946476224977 | 0.758977508498  |
| H | 13.767879419596 | -2.189082910430 | 0.599088414804  |
| C | 14.334241510816 | -0.354237485965 | 1.669198383690  |
| H | 14.683383373012 | -0.818990791459 | 2.616861266575  |
| H | 15.013506867366 | 0.511188445104  | 1.506594316019  |
| C | 12.932735075435 | 0.162050389650  | 1.817420462978  |
| C | 12.288291891392 | 1.185968974173  | 1.091904852174  |
| N | 11.994769913834 | -0.383648214726 | 2.708028393054  |
| C | 10.945177109908 | 1.251698609789  | 1.569806471382  |
| C | 10.782605055609 | 0.289990819145  | 2.573481136401  |
| H | 10.143793156510 | 1.915353414595  | 1.208224287539  |
| C | 12.253872403610 | -1.390828751540 | 3.745208121483  |
| H | 11.354093450405 | -2.040968576036 | 3.816476935153  |
| H | 13.070685725352 | -2.061320398001 | 3.397460927132  |
| C | 9.526862405592  | -0.018305172144 | 3.344782825114  |
| H | 9.736325670477  | -0.490969972631 | 4.329548901154  |
| H | 9.023241163383  | 0.944051735322  | 3.590977288766  |
| C | 8.519424519708  | -0.880781995339 | 2.555913469621  |
| H | 8.406008211582  | -0.484672324694 | 1.516521818513  |
| H | 8.883696328777  | -1.929227006019 | 2.412951206214  |
| C | 7.128532500676  | -0.933639481529 | 3.176247058875  |
| C | 6.012956697402  | -1.580587965780 | 2.336612643227  |
| C | 5.014928757488  | -0.467163442709 | 1.901676986261  |
| H | 5.554979792064  | 0.244916217934  | 1.235249931539  |
| H | 4.757657640237  | 0.115332560286  | 2.812594278618  |
| C | 3.778910518369  | -0.955177153637 | 1.201217660735  |
| C | 3.612968346872  | -1.264228968138 | -0.154308997935 |
| N | 2.580971207913  | -1.248966792173 | 1.870550728499  |
| C | 2.251669488736  | -1.750847482101 | -0.315795421203 |
| C | 1.636222676028  | -1.731164122166 | 0.972187640144  |
| H | 1.908784836983  | -2.370600876955 | -1.163398141484 |
| C | 2.345100742448  | -1.046786551423 | 3.305834729109  |
| H | 3.193369818226  | -1.497864024354 | 3.869067263131  |
| H | 1.447445587305  | -1.642727713690 | 3.584042852681  |
| H | 6.415034862620  | -2.116429349960 | 1.447909063558  |
| H | 5.492423940524  | -2.330777119342 | 2.975694278374  |
| O | 6.864945524399  | -0.421219033913 | 4.257828626992  |
| C | 0.315353956551  | -2.329388821407 | 1.396154999900  |
| H | 0.489560757187  | -3.086952918489 | 2.198440582270  |
| H | -0.344925777983 | -1.557758332748 | 1.860026483218  |
| C | -0.452268220563 | -3.024989938847 | 0.239296070096  |
| H | 0.198411803874  | -3.832711627774 | -0.172702615133 |
| H | -0.586556052606 | -2.291542634859 | -0.588869372903 |
| C | -1.772022324591 | -3.622987984811 | 0.639504087878  |
| C | -2.010500577825 | -4.815481905446 | 1.342254515030  |
| N | -3.012829949238 | -3.041763328519 | 0.346312141933  |
| C | -3.428479114180 | -4.938571564222 | 1.478902373305  |
| C | -4.032173630730 | -3.840706380834 | 0.863047849555  |

|   |                 |                 |                 |
|---|-----------------|-----------------|-----------------|
| H | -3.967717680066 | -5.762834369887 | 1.969806426183  |
| C | -5.486864608450 | -3.512460896457 | 0.708905106860  |
| H | -5.813089441705 | -3.484784283855 | -0.358194117203 |
| H | -6.097174531253 | -4.290470270411 | 1.212607938289  |
| H | -5.766443963944 | -2.532443559598 | 1.163334714465  |
| C | -3.214095209407 | -1.764855433389 | -0.326096175137 |
| H | -2.457781722212 | -1.662115016170 | -1.140560643477 |
| H | -4.202108235891 | -1.784892217533 | -0.838172406203 |
| C | -3.128070484754 | -0.547687100035 | 0.617504706326  |
| H | -3.987900412955 | -0.580820042100 | 1.325870442398  |
| H | -2.212236659188 | -0.649351140876 | 1.248546187276  |
| C | -3.078875000193 | 0.799505240709  | -0.121928211075 |
| H | -4.008840397767 | 0.942792784547  | -0.724085750704 |
| H | -2.236481160438 | 0.763513006724  | -0.857759398485 |
| C | -2.864925778334 | 2.014441037081  | 0.801938999565  |
| H | -2.672877469146 | 2.919484764822  | 0.177523744292  |
| H | -1.928432511763 | 1.849143328356  | 1.393330530209  |
| C | -4.037405051945 | 2.302470526410  | 1.755698645098  |
| H | -4.977077268520 | 2.448470799726  | 1.172570663197  |
| H | -4.234763560646 | 1.419775780458  | 2.408923684061  |
| C | -3.817019144243 | 3.504146869602  | 2.698987119609  |
| H | -4.722474234702 | 3.645099789801  | 3.331484549730  |
| H | -2.988067202038 | 3.281028778441  | 3.406652144676  |
| C | 2.166128689245  | 0.412526951957  | 3.806456131380  |
| H | 3.118787510809  | 0.965993913685  | 3.635691993330  |
| C | 1.908268005912  | 0.390902511818  | 5.325937440029  |
| H | 0.957381338336  | -0.137372955272 | 5.571536740381  |
| H | 2.730763491824  | -0.117429577926 | 5.877713070358  |
| C | 12.572258460410 | -0.799494303262 | 5.140825968546  |
| H | 11.907475102726 | 0.077785530199  | 5.313287335671  |
| H | 12.296221630489 | -1.557722016110 | 5.913930208735  |
| C | 14.036561212849 | -0.357496061547 | 5.381727407351  |
| H | 14.391827277533 | 0.186781772114  | 4.471740408315  |
| C | 14.974265172929 | -1.561867631819 | 5.610706304101  |
| H | 14.685851130774 | -2.125570060676 | 6.528183187282  |
| H | 14.957456024834 | -2.283042862983 | 4.760564754474  |
| C | 12.234947871428 | 6.978662930528  | 2.927390321043  |
| C | 10.142366703552 | 6.088851662230  | 2.901994680978  |
| C | 10.003265035368 | 7.493317178393  | 2.830101106554  |
| H | 11.585241280099 | 9.103407854255  | 2.811607181665  |
| C | 11.317761404584 | 8.036071419010  | 2.842434423250  |
| N | 11.502931028111 | 5.789787435835  | 2.952317666299  |
| C | 12.100449655057 | 4.459902132938  | 3.061761847644  |
| H | 13.018224934211 | 4.433035793868  | 2.435631208651  |
| H | 11.412483692490 | 3.710757603267  | 2.609439129786  |
| C | 12.501122659821 | 3.996750930331  | 4.488504309077  |
| H | 13.021728956457 | 4.852888920120  | 4.987149764692  |
| C | 11.286504202628 | 3.621599646653  | 5.363660872223  |
| H | 11.623135736020 | 3.289046984559  | 6.370814044546  |
| H | 10.593100904177 | 4.480498823786  | 5.514856297439  |
| C | 3.572301538495  | 3.772290168198  | 2.697407365993  |
| C | 1.535530444996  | 4.810930479488  | 2.811195319324  |
| C | 1.945774265352  | 4.546696099878  | 4.127371704829  |
| H | 3.846252485754  | 3.575890532041  | 4.891300190380  |
| C | 3.220284458995  | 3.894686816994  | 4.042889224522  |
| N | 2.533010081541  | 4.333370625515  | 1.946568142650  |

|   |                 |                 |                 |
|---|-----------------|-----------------|-----------------|
| C | 2.463050267906  | 4.358590529449  | 0.490415846871  |
| H | 2.097911447344  | 5.356031798707  | 0.154832578821  |
| H | 3.498320886693  | 4.269925981524  | 0.088077102457  |
| C | 1.575614095032  | 3.259698843366  | -0.168923269190 |
| H | 0.519692889044  | 3.409466811024  | 0.160646683263  |
| C | 1.638936786797  | 3.400524804966  | -1.696491027838 |
| H | 2.673297968207  | 3.234168069919  | -2.077669797281 |
| H | 0.975232328266  | 2.659637956976  | -2.191952370020 |
| H | 10.713580258467 | 2.779835884021  | 4.907848402700  |
| H | 1.319703159547  | 4.414266355355  | -2.024287027688 |
| H | 1.835796114451  | 1.427598839554  | 5.722247119510  |
| H | 16.031039096053 | -1.232873088404 | 5.732211464932  |
| N | 13.488532327523 | 2.918172089711  | 4.316557126574  |
| H | 13.644841451500 | 2.423767277566  | 5.218273377120  |
| H | 13.094987567292 | 2.197870669560  | 3.684887309111  |
| N | 14.057888147544 | 0.639532023611  | 6.473751291415  |
| H | 13.629533595338 | 0.242541743682  | 7.327457779362  |
| H | 15.034644310360 | 0.852620502623  | 6.734689079218  |
| N | 1.140322953358  | 1.151915725323  | 3.036563030443  |
| H | 0.203773458436  | 0.741988028582  | 3.200362939163  |
| H | 1.090846001388  | 2.116335662361  | 3.416851449742  |
| N | 1.959553518375  | 1.884818420088  | 0.263704675255  |
| H | 2.993963046809  | 1.808655958762  | 0.254217601656  |
| H | 1.679389220015  | 1.704544267467  | 1.273520449275  |
| C | 15.920845758700 | 9.150156338010  | 0.273146825454  |
| H | 15.356451217933 | 8.735822874795  | -0.594042370311 |
| H | 15.194886614590 | 9.749314558717  | 0.871489936176  |
| H | 16.674565838945 | 9.858716519340  | -0.130290307917 |
| C | 8.710610244754  | 8.258638051842  | 2.747340025376  |
| H | 8.315025690464  | 8.313349247994  | 1.704517770748  |
| H | 7.908991680406  | 7.804638582400  | 3.374219113233  |
| H | 8.842854591916  | 9.306655204080  | 3.092529882282  |
| C | 1.210963253981  | 4.912618268473  | 5.391654859336  |
| H | 0.559193074276  | 5.803683841813  | 5.254729609598  |
| H | 0.556188368620  | 4.088704368446  | 5.763902168695  |
| H | 1.921321858493  | 5.148824053211  | 6.213999830792  |
| C | -4.335426754333 | 7.926562289171  | 0.227685703325  |
| H | -4.390616598152 | 7.765680987302  | -0.875467750408 |
| H | -5.370895931139 | 8.144389258555  | 0.573259161950  |
| H | -3.733660490071 | 8.847658532358  | 0.387957956853  |
| C | 13.360871972364 | -0.329950794672 | -4.379251096503 |
| H | 13.567158755999 | 0.628877034627  | -4.906952656166 |
| H | 13.645950833394 | -1.150171618491 | -5.080790484092 |
| H | 12.260568086968 | -0.401720166057 | -4.237723326383 |
| C | 12.892468825978 | 2.073631641411  | 0.036164364866  |
| H | 13.786595258987 | 2.621918799758  | 0.415770584533  |
| H | 13.216613921254 | 1.506524826791  | -0.865294833915 |
| H | 12.159899993602 | 2.839211675458  | -0.299858614728 |
| C | 4.673554455105  | -1.218238406012 | -1.222322920538 |
| H | 5.442940677958  | -0.440534535298 | -1.018617469523 |
| H | 5.213223929723  | -2.191233091616 | -1.303818323399 |
| H | 4.243356347174  | -1.008355004629 | -2.226060435712 |
| C | -0.973722661418 | -5.779287237187 | 1.855353163218  |
| H | -0.033680511245 | -5.749952239553 | 1.258817399397  |
| H | -0.693782344745 | -5.576497822621 | 2.916938870265  |
| H | -1.347432462992 | -6.826279870007 | 1.823409786623  |

|    |                 |                 |                 |
|----|-----------------|-----------------|-----------------|
| Cu | 1.402142492621  | 0.155263539191  | -0.649259047018 |
| O  | 0.094847612099  | -0.082889327699 | -2.367717599243 |
| H  | -0.088039691012 | -0.948708125009 | -2.791595900980 |
| H  | -0.660924823750 | 0.489065932052  | -2.621980166118 |

### HAMC-Cu(II)

|   |                 |                 |                 |
|---|-----------------|-----------------|-----------------|
| C | -0.616511695097 | 4.838484096914  | 1.573384906998  |
| C | -1.733028137869 | 4.895047892643  | 0.724283733998  |
| C | -2.890732249914 | 4.653667045328  | 1.543742990266  |
| C | -2.464092755291 | 4.490871121125  | 2.870024459073  |
| N | -1.076547464665 | 4.586323833904  | 2.874205915786  |
| H | -3.943174019210 | 4.722377038683  | 1.224446656250  |
| C | -3.294651189780 | 4.381339470557  | 4.115285798523  |
| H | -3.117342579508 | 3.448359448303  | 4.697697439201  |
| H | -3.118769337022 | 5.235185323950  | 4.811135861661  |
| H | -4.371139907879 | 4.403554811871  | 3.844800462816  |
| C | -0.248165307975 | 4.435767076899  | 4.076710168158  |
| H | 0.759379706644  | 4.845568257934  | 3.846903908132  |
| H | -0.665934302507 | 5.089988343564  | 4.876143344395  |
| C | -0.119927674885 | 2.993712070784  | 4.615410333314  |
| H | 0.533598716652  | 3.043412417173  | 5.519613869993  |
| H | -1.112034486388 | 2.653418867219  | 4.990747287211  |
| C | 0.448622135054  | 1.963493234438  | 3.624189119141  |
| H | -0.219057304506 | 1.895755052099  | 2.732881271764  |
| H | 1.429648380572  | 2.336364202997  | 3.243152698516  |
| C | 0.677069430493  | 0.558910615092  | 4.228341000974  |
| H | 1.222831610665  | -0.071050931432 | 3.482889482729  |
| H | 1.375439126062  | 0.657996059401  | 5.092921838779  |
| C | -0.579377952839 | -0.196214980757 | 4.710488365603  |
| H | -0.269043473436 | -1.008159995337 | 5.406276512356  |
| H | -1.222922135749 | 0.473214417831  | 5.327929903262  |
| C | -1.448445047344 | -0.826831977007 | 3.595961536532  |
| H | -0.847650626850 | -1.541849518575 | 2.989456738521  |
| H | -1.798317185197 | -0.056109923828 | 2.873601082372  |
| C | 0.826680843112  | 4.981908182749  | 1.162318086474  |
| H | 1.488141368570  | 5.204226539549  | 2.029673734908  |
| H | 0.920177270011  | 5.865691704388  | 0.489429833450  |
| C | 1.337873222159  | 3.726908386087  | 0.388470381015  |
| H | 1.427238432390  | 2.871668701368  | 1.096291176611  |
| H | 0.525225293302  | 3.449525002053  | -0.321363437682 |
| C | 6.263120754207  | 3.822931367678  | -0.963814159567 |
| H | 6.534826045655  | 2.884184754316  | -0.432512202504 |
| H | 6.640102097685  | 3.680093744776  | -2.000134074942 |
| C | 7.090420668422  | 4.992183559926  | -0.355743406677 |
| H | 6.848873765658  | 5.176778842867  | 0.715695453446  |
| H | 6.862656752288  | 5.937970270836  | -0.903233262771 |
| C | 8.582819861594  | 4.690973022309  | -0.536831392513 |
| C | 9.487452504515  | 4.767072458763  | 0.682797731216  |
| H | 9.046802811901  | 4.080717599995  | 1.449078009564  |
| H | 9.381144126543  | 5.784307079954  | 1.135537685097  |
| C | 10.969409546884 | 4.436499149946  | 0.396535023206  |
| H | 11.032885878337 | 3.425073124000  | -0.063894673308 |
| H | 11.336749710379 | 5.134623148788  | -0.388327278136 |
| O | 9.000686957353  | 4.356250177694  | -1.646986190006 |



|   |                 |                 |                |
|---|-----------------|-----------------|----------------|
| C | 13.528316026299 | 3.156870878175  | 4.617499562688 |
| H | 13.782314235937 | 3.848481447872  | 5.452476097192 |
| H | 12.753449637230 | 2.465303301162  | 5.024039829181 |
| C | 14.800698308402 | 2.349024830994  | 4.245384732644 |
| H | 15.513585885524 | 3.038228225254  | 3.726299369522 |
| H | 14.531307556742 | 1.586853286069  | 3.475771177714 |
| C | 15.482117372163 | 1.690938461220  | 5.410405872692 |
| C | 15.134213501973 | 1.683025163832  | 6.770647741314 |
| N | 16.687305970253 | 0.995047353571  | 5.280591858750 |
| C | 16.137179246563 | 0.974085915358  | 7.485828504091 |
| H | 14.248760928726 | 2.165772639388  | 7.209253245901 |
| C | 17.098633800838 | 0.550703940933  | 6.534420215293 |
| C | 18.338537266288 | -0.261402929211 | 6.766476418204 |
| H | 18.905563544453 | 0.183187244697  | 7.618309923121 |
| H | 19.023291382936 | -0.210536652466 | 5.891251628014 |
| C | 18.073211507130 | -1.758474326867 | 7.079849810237 |
| H | 17.824893905024 | -1.919951790802 | 8.153339681951 |
| H | 17.174150367478 | -2.116572291635 | 6.516952463589 |
| C | 19.218268387321 | -2.691854486912 | 6.637589294452 |
| C | 19.395258716708 | -3.970879682629 | 7.438790495978 |
| H | 20.101230757036 | -4.658115835358 | 6.929571565821 |
| H | 19.798843288581 | -3.719607810788 | 8.448061021607 |
| H | 18.418918284917 | -4.478589073684 | 7.612089943621 |
| O | 19.917250051447 | -2.421563445061 | 5.669276570547 |
| N | -2.606161915981 | -1.541645814924 | 4.140714010427 |
| C | -3.736065029984 | -0.897002708787 | 4.666375608072 |
| C | -2.602401036077 | -2.876896158636 | 4.563150424565 |
| C | -4.463933170826 | -1.830355973163 | 5.418750173131 |
| C | -3.741860648279 | -3.065837273363 | 5.347989855259 |
| H | -4.041782700761 | -4.021648585543 | 5.804643999181 |
| C | -4.137827302388 | 0.490930724737  | 4.247412670672 |
| H | -4.547725192810 | 1.051483286760  | 5.118869647167 |
| H | -3.258394691934 | 1.075571272930  | 3.897619081549 |
| C | -5.234847555367 | 0.520241920174  | 3.124642509205 |
| H | -6.209839867251 | 0.214192058598  | 3.563279960324 |
| H | -5.344620858951 | 1.563910201283  | 2.747816458333 |
| C | -4.897706446867 | -0.394076542260 | 1.949627390837 |
| C | -5.574563917795 | -1.737027753834 | 1.896506268769 |
| H | -5.247513952650 | -2.321569657828 | 1.013205027842 |
| H | -5.341272366661 | -2.293357409970 | 2.837534316472 |
| H | -6.682031590260 | -1.611871430407 | 1.883699509708 |
| O | -4.074234677255 | -0.069508038192 | 1.079196310464 |
| C | -1.609585668725 | -3.914816039315 | 4.112402071931 |
| H | -1.611521198406 | -3.966746137126 | 2.995535271418 |
| H | -1.999558146063 | -4.902304330631 | 4.443521684731 |
| C | -0.135333265275 | -3.786408581869 | 4.623134881534 |
| H | 0.301640921343  | -2.817252940602 | 4.290188349640 |
| H | -0.159263644875 | -3.737401755418 | 5.734699102379 |
| C | 0.778272018049  | -4.907755071433 | 4.224880926063 |
| C | 1.210816743373  | -6.011737929912 | 4.991461246469 |
| N | 1.357467461744  | -5.011693893316 | 2.956438913172 |
| C | 2.072524888738  | -6.779215047070 | 4.156688934787 |
| C | 2.156894330588  | -6.153734053141 | 2.905297263446 |
| H | 2.598876443634  | -7.703354161150 | 4.440998359877 |
| C | 1.065173500880  | -4.145177976018 | 1.814330514234 |
| H | 0.974489514613  | -4.796286509044 | 0.917246276481 |

|   |                 |                 |                 |
|---|-----------------|-----------------|-----------------|
| H | 0.052813824947  | -3.708929719490 | 1.962513428041  |
| C | 3.023307935595  | -6.512838042712 | 1.731045225863  |
| H | 2.919053660690  | -7.602150768739 | 1.518468729109  |
| H | 2.703926952983  | -5.990987705333 | 0.801687563571  |
| C | 4.515512839108  | -6.187902955972 | 1.985741838037  |
| H | 4.623526293391  | -5.162488920645 | 2.418096128976  |
| H | 4.943497140695  | -6.871489528646 | 2.753829524540  |
| C | 5.391822837559  | -6.168256677507 | 0.727468080768  |
| C | 6.842639338884  | -6.589222943598 | 0.957998696954  |
| C | 7.769266928022  | -6.498971883245 | -0.267407990031 |
| H | 7.500317048560  | -5.573671681632 | -0.826492000645 |
| H | 7.521265732963  | -7.331455363368 | -0.972440485756 |
| C | 9.241533363151  | -6.504041407428 | 0.078733961601  |
| C | 9.931403037780  | -7.143036530811 | 1.125234450796  |
| N | 10.190667589760 | -5.819052230405 | -0.695136015902 |
| C | 11.315321373920 | -6.781281947208 | 0.990753349034  |
| C | 11.458650644278 | -5.967198164378 | -0.141416186258 |
| H | 12.134586144332 | -7.159442318670 | 1.620899167517  |
| C | 9.893820465043  | -5.010011661983 | -1.881464043415 |
| H | 9.009213308070  | -5.448058741126 | -2.394583538603 |
| H | 10.739879918230 | -5.117154066601 | -2.598136601368 |
| H | 7.221123016341  | -5.960000650858 | 1.800567122287  |
| H | 6.813232532231  | -7.621247714838 | 1.379281885142  |
| O | 4.965788800564  | -5.792830374349 | -0.359437565929 |
| C | 12.701854480594 | -5.326867371623 | -0.701140625306 |
| H | 12.658891540012 | -5.310480065110 | -1.814850136502 |
| H | 12.773833955163 | -4.258950372806 | -0.380437739255 |
| C | 13.998106315160 | -6.057284437389 | -0.253129938678 |
| H | 13.889276654330 | -7.140887095892 | -0.500397870556 |
| H | 14.069051781659 | -6.002959304081 | 0.854688421931  |
| C | 15.258135086845 | -5.550082278541 | -0.893044210648 |
| C | 15.654529084432 | -5.703543102147 | -2.250328653366 |
| N | 16.285375037349 | -4.891050895514 | -0.220386454701 |
| C | 16.940302382112 | -5.119880425449 | -2.371976423749 |
| C | 17.325572100356 | -4.627750197710 | -1.114582206002 |
| H | 17.556832658026 | -5.073154126713 | -3.282261973248 |
| C | 18.612848639844 | -3.980410060063 | -0.714677387641 |
| H | 19.126710742983 | -4.528170054786 | 0.110521766768  |
| H | 19.306075006912 | -3.961054310885 | -1.580594170111 |
| H | 18.482762747771 | -2.927831212863 | -0.369090290524 |
| C | 16.316438156897 | -4.537251939581 | 1.202462000106  |
| H | 15.583046492336 | -5.181065513269 | 1.735017405013  |
| H | 17.315818597830 | -4.816427240830 | 1.610428694681  |
| C | 16.019571978308 | -3.055880816446 | 1.511137738532  |
| H | 16.823273283303 | -2.418014449306 | 1.073853690403  |
| H | 15.068422678352 | -2.758906469809 | 1.011249866776  |
| C | 15.894260181443 | -2.808624025435 | 3.027512408554  |
| H | 16.719344614362 | -3.336655694754 | 3.567627020715  |
| H | 14.945820004465 | -3.279080453761 | 3.373539405107  |
| C | 15.909294666084 | -1.320685474283 | 3.441228125592  |
| H | 15.433566824671 | -1.224321061978 | 4.446054620698  |
| H | 15.260005988617 | -0.735095142144 | 2.744214546968  |
| C | 17.320106901377 | -0.705509506064 | 3.496886511004  |
| H | 17.980119683130 | -1.349668381490 | 4.122990740062  |
| H | 17.790763365325 | -0.710228076052 | 2.484880882904  |
| C | 17.387252275647 | 0.750255079297  | 4.010266494385  |

|   |                 |                 |                 |
|---|-----------------|-----------------|-----------------|
| H | 18.452964049466 | 1.055580254918  | 4.122602224965  |
| H | 16.952906682574 | 1.441316011797  | 3.256618914517  |
| C | 9.655226471970  | -3.524541336221 | -1.557580710462 |
| H | 8.794292679394  | -3.440269184793 | -0.854656403111 |
| H | 10.538290892734 | -3.143508346275 | -0.993642604377 |
| C | 9.404449140842  | -2.655551555069 | -2.801921541016 |
| H | 10.315064046470 | -2.654723951250 | -3.449914533335 |
| H | 8.596518070463  | -3.115115906854 | -3.420506197196 |
| C | 9.000940230131  | -1.200916933449 | -2.482607894597 |
| H | 8.827584766808  | -0.651925305396 | -3.436949195502 |
| H | 8.027116752896  | -1.196081041984 | -1.936793082359 |
| C | 2.071366222625  | -3.006240166978 | 1.543649969016  |
| H | 2.190467486581  | -2.397110460811 | 2.471054209252  |
| H | 3.080299003580  | -3.429218757415 | 1.326728196141  |
| C | 1.618769252161  | -2.092319588979 | 0.380554671601  |
| H | 2.349105455906  | -1.252047825465 | 0.291170922251  |
| H | 0.643429552231  | -1.610965149818 | 0.646824813238  |
| C | 1.474786415206  | -2.817075338874 | -0.974529078715 |
| H | 2.466889280048  | -3.234718208643 | -1.276329436217 |
| H | 0.814152501164  | -3.704884040104 | -0.846682367292 |
| C | 2.574013370690  | 3.881982692166  | -0.449428683588 |
| C | 4.772945748434  | 3.984836639734  | -1.053741554420 |
| C | 4.018867173025  | 4.296136977771  | -2.195538314921 |
| H | 1.767309639092  | 4.450123061502  | -2.447896099264 |
| C | 2.637105543573  | 4.213325324207  | -1.813261265432 |
| N | 3.881081696016  | 3.747263063940  | 0.004630729949  |
| C | 4.241096701741  | 3.370364833843  | 1.378207073043  |
| H | 3.571020519236  | 3.929668235408  | 2.069927335437  |
| H | 5.265186811036  | 3.754434129551  | 1.579883496377  |
| C | 4.180346426391  | 1.863361816120  | 1.715313711502  |
| H | 4.316990018192  | 1.783422411226  | 2.821312117089  |
| H | 3.155275876553  | 1.470451981483  | 1.511991004999  |
| C | 5.234560761010  | 0.992546996993  | 1.012651078989  |
| H | 5.008635136700  | 0.925820182267  | -0.079083032259 |
| H | 6.229067069757  | 1.494245360307  | 1.083008222768  |
| C | 5.383819711059  | -0.419495989319 | 1.605528067914  |
| H | 5.620513663529  | -0.333828854742 | 2.693192586601  |
| H | 4.422939773320  | -0.982597597691 | 1.552968700903  |
| C | 11.894307951717 | 4.551986591971  | 1.575429343619  |
| C | 13.003618814673 | 3.990901991681  | 3.483078895555  |
| C | 13.392226418687 | 5.303988544504  | 3.139088087719  |
| H | 12.763628590717 | 6.589746675594  | 1.392463969959  |
| C | 12.692332358537 | 5.640297115805  | 1.945099029698  |
| N | 12.088230365771 | 3.546114970792  | 2.525114953768  |
| C | 11.423996218785 | 2.240370942170  | 2.525829162288  |
| H | 11.267070884284 | 1.941017389710  | 3.586537565466  |
| H | 10.405215333370 | 2.356752585867  | 2.092134621842  |
| C | 12.162802434324 | 1.120039274768  | 1.760538330038  |
| H | 12.168895544269 | 1.365949397883  | 0.673648040318  |
| H | 13.234251105304 | 1.099184783532  | 2.068410969119  |
| C | 11.530561093600 | -0.270531385805 | 1.979879925100  |
| H | 10.429029070206 | -0.204549055274 | 1.806119357927  |
| H | 11.920066110019 | -0.965226240096 | 1.200528837188  |
| C | 11.805341489724 | -0.886454643443 | 3.368520638010  |
| H | 11.530200748034 | -0.167018077799 | 4.175058859907  |
| H | 12.898612654048 | -1.069633752528 | 3.483257580952  |

|   |                 |                 |                 |
|---|-----------------|-----------------|-----------------|
| C | 6.504207146647  | -1.204420778125 | 0.896351813721  |
| H | 6.161896591843  | -1.526913226930 | -0.118650683808 |
| H | 7.389300527394  | -0.552823943464 | 0.718373814745  |
| C | 6.944244902098  | -2.462931413510 | 1.631106733883  |
| C | 11.038973561558 | -2.193070696188 | 3.635281527385  |
| H | 11.209188679406 | -2.527806538170 | 4.688081678788  |
| H | 9.940290986081  | -2.038445057306 | 3.546872530132  |
| C | 11.455621872201 | -3.365252596249 | 2.749368002978  |
| C | 0.879583902615  | -1.998230955443 | -2.138912950940 |
| H | 0.662640239478  | -2.703098775708 | -2.972428620316 |
| H | -0.110049367147 | -1.574625733371 | -1.843999806745 |
| C | 1.766035473118  | -0.877020430948 | -2.710518932844 |
| H | 2.836228531158  | -1.182083487237 | -2.778751329034 |
| H | 1.472465068900  | -0.667258111683 | -3.770039778246 |
| C | 1.702016037834  | 0.477422636967  | -2.034320239760 |
| C | 10.052067734433 | -0.436583887973 | -1.639624371353 |
| H | 10.196496352919 | -0.945794874267 | -0.662301761794 |
| H | 11.026671018465 | -0.425856753824 | -2.178866948724 |
| C | 9.625656055669  | 0.994437427423  | -1.339212173110 |
| O | 8.286545672980  | -2.643489417660 | 1.519424728584  |
| H | 8.577368832088  | -3.474354038218 | 1.980249438847  |
| O | 10.465475957993 | -4.288623997111 | 2.624727992033  |
| H | 10.806542063548 | -5.073982581765 | 2.087361573281  |
| O | 10.087085885758 | 1.864041834811  | -2.254957935588 |
| H | 9.756221328215  | 2.789278749285  | -2.048764594713 |
| O | 2.723549706256  | 1.260545928714  | -2.327409234153 |
| H | 2.607037414119  | 2.216972965861  | -1.983921712444 |
| O | 6.208176323876  | -3.228215815910 | 2.235419800022  |
| O | 12.556290559938 | -3.493808877014 | 2.231621902527  |
| O | 8.922389444714  | 1.314705401547  | -0.378501666193 |
| O | 0.756894856093  | 0.851543120789  | -1.309929455005 |
| C | 14.864067240597 | -6.376578721576 | -3.337760263538 |
| H | 14.256943561586 | -7.226713712633 | -2.953183765781 |
| H | 14.158108255540 | -5.674206119803 | -3.842529649108 |
| H | 15.534099889910 | -6.776186087268 | -4.129310498536 |
| C | 9.404840908755  | -8.075505617092 | 2.189457459161  |
| H | 8.816719888153  | -7.555074668436 | 2.980147775226  |
| H | 8.753827308315  | -8.874575249065 | 1.768911722896  |
| H | 10.247896376025 | -8.587089322709 | 2.701899802004  |
| C | 0.821010498129  | -6.328808254962 | 6.409588886776  |
| H | 0.683343074921  | -5.413182065123 | 7.027630611663  |
| H | -0.135484291969 | -6.900699832420 | 6.463138681516  |
| H | 1.594989417704  | -6.951433436335 | 6.908123207008  |
| C | -5.774871213442 | -1.598360969221 | 6.122573542490  |
| H | -6.649323598551 | -1.948129188714 | 5.523451310239  |
| H | -5.814339338255 | -2.151540246570 | 7.086695570784  |
| H | -5.945889670103 | -0.523529017299 | 6.353524279692  |
| C | 16.181356191071 | 0.714074656755  | 8.965765087045  |
| H | 15.810744748014 | -0.306270497213 | 9.225206858470  |
| H | 17.213935783975 | 0.793700332930  | 9.374981541750  |
| H | 15.547147126521 | 1.438597317650  | 9.520407150792  |
| C | 14.377913930879 | 6.168506997008  | 3.877933153280  |
| H | 14.280090163910 | 6.072551411876  | 4.983086630301  |
| H | 15.435420443929 | 5.916648678155  | 3.626043005886  |
| H | 14.235339415865 | 7.241210640658  | 3.625597692679  |
| C | 4.536247973849  | 4.653363554318  | -3.562559511087 |

|    |                 |                |                 |
|----|-----------------|----------------|-----------------|
| H  | 4.614128249291  | 5.757279311868 | -3.699402177817 |
| H  | 5.546891072526  | 4.232548532054 | -3.757608213993 |
| H  | 3.859727308652  | 4.278738373168 | -4.361713092664 |
| C  | -1.733485386564 | 5.175370401374 | -0.756509248136 |
| H  | -0.815762334157 | 5.712665121083 | -1.081880615044 |
| H  | -1.802314013887 | 4.245672232345 | -1.372491052033 |
| H  | -2.602649137488 | 5.806562587708 | -1.045401130128 |
| Cu | -0.754128982364 | 1.291088005041 | -0.288053669473 |
| O  | -2.230954975043 | 1.745904894532 | 0.812047400427  |
| H  | -2.463055844365 | 2.696959154934 | 1.038480213474  |
| H  | -3.044405904336 | 1.137181415782 | 0.944175990953  |

## PAMBA-Cu(II)

|   |                 |                |                 |
|---|-----------------|----------------|-----------------|
| C | 6.547156385160  | 1.958458195649 | -4.780490867052 |
| C | 7.400658918675  | 1.203347423160 | -5.614644831958 |
| C | 8.729530144400  | 1.421259525218 | -5.149381646546 |
| C | 8.679953966244  | 2.295649797097 | -4.055993122608 |
| N | 7.342320968080  | 2.627390129702 | -3.846033908569 |
| H | 9.650148518455  | 0.990943522210 | -5.571824746320 |
| C | 9.798267405409  | 2.832290819970 | -3.217352003629 |
| H | 9.862784272823  | 3.945890378713 | -3.251763517364 |
| H | 9.715320085278  | 2.543440196215 | -2.142644700271 |
| H | 10.766173246893 | 2.437715288705 | -3.589701286457 |
| C | 6.841790466846  | 3.390228626244 | -2.703171903409 |
| H | 7.602480325819  | 4.156047098344 | -2.431578268156 |
| H | 5.940966907075  | 3.963442032761 | -3.023685235718 |
| C | 6.499057224761  | 2.514194649431 | -1.478622380295 |
| H | 5.850352739384  | 1.669644193060 | -1.810793437973 |
| H | 7.437032640338  | 2.045145752986 | -1.098875380218 |
| C | 5.789171651137  | 3.299943766129 | -0.361857449581 |
| H | 6.430864640169  | 4.154844636561 | -0.034084433020 |
| H | 4.863301281833  | 3.762815905568 | -0.781870928201 |
| C | 5.395078743101  | 2.461416339943 | 0.872064745048  |
| H | 4.751881433698  | 3.090371654118 | 1.534410561882  |
| H | 4.748581767031  | 1.609880642986 | 0.547585523157  |
| C | 6.576374413716  | 1.920020937875 | 1.699107129167  |
| H | 7.171816306624  | 1.183042501348 | 1.110909326551  |
| H | 7.278122180834  | 2.755876378587 | 1.933885603011  |
| C | 6.103163915863  | 1.269605708343 | 3.016736069247  |
| H | 5.438837680052  | 0.402812794718 | 2.798764078984  |
| H | 5.480658359297  | 1.984773577220 | 3.596076755766  |
| C | 5.059304800675  | 2.117364436106 | -4.871196217065 |
| H | 4.628364898886  | 2.435513384722 | -3.895655650269 |
| H | 4.604385926363  | 1.122764152820 | -5.091262781940 |
| C | 4.554463271976  | 3.102110703313 | -5.983057734578 |
| H | 5.088742604109  | 4.075302662948 | -5.892166989650 |
| H | 4.850396395627  | 2.698388146129 | -6.976665309474 |
| C | -0.020186328901 | 5.031604038781 | -4.815517760960 |
| H | 0.325954737080  | 6.089926880084 | -4.845012811739 |
| H | -0.892551890357 | 4.997783103577 | -5.504504466511 |
| C | -0.577919559285 | 4.687525684113 | -3.378773915965 |
| H | -0.627582998650 | 3.582923357886 | -3.258935642657 |
| H | -1.613116178833 | 5.094050579414 | -3.306024445784 |
| C | 0.238920921687  | 5.285898139639 | -2.254807428619 |

|   |                  |                 |                 |
|---|------------------|-----------------|-----------------|
| C | 0.143490641677   | 6.785705297618  | -2.023905794834 |
| H | -0.800608311738  | 7.188616901593  | -2.453865170287 |
| H | 0.951749533875   | 7.218785247944  | -2.667441082197 |
| C | 0.345124082898   | 7.273574636549  | -0.550804081770 |
| H | 0.864081943515   | 6.468824068615  | 0.021227425146  |
| H | 1.041109259271   | 8.138841805539  | -0.550505361660 |
| O | 1.022310696857   | 4.600548147357  | -1.570515084930 |
| C | -4.350956950226  | 7.039841255521  | 1.362594108071  |
| H | -4.263124939175  | 6.033707524208  | 1.836124939357  |
| H | -4.865985377807  | 7.672454834058  | 2.119023821560  |
| C | -5.262200983029  | 6.945876864692  | 0.081809250212  |
| H | -4.668876253591  | 6.473025238911  | -0.733688119963 |
| H | -5.460494426009  | 7.985093467391  | -0.262948151047 |
| C | -6.577915131426  | 6.250793369802  | 0.262692318063  |
| C | -7.814348552110  | 6.788342060973  | 0.643067356439  |
| N | -6.752545832502  | 4.873206243524  | 0.104760716018  |
| C | -8.764224198918  | 5.732628666784  | 0.712005621178  |
| H | -8.005939133187  | 7.851653747049  | 0.853848488870  |
| C | -8.085035342050  | 4.541590906367  | 0.353438168253  |
| C | -8.638929941544  | 3.138955433319  | 0.307262871093  |
| H | -8.973495564972  | 2.858923252876  | 1.335883242606  |
| H | -7.849629702108  | 2.405554699840  | 0.033299194859  |
| C | -9.841221704745  | 2.929139083387  | -0.641530274411 |
| H | -10.367082734703 | 1.979380798149  | -0.366912241553 |
| H | -10.617344522204 | 3.716449931776  | -0.508272022967 |
| C | -9.520497149444  | 2.791254223684  | -2.132681669234 |
| C | -10.699533497475 | 2.953244095529  | -3.078451769957 |
| H | -10.466836031441 | 2.536799305414  | -4.080087162024 |
| H | -11.626013907685 | 2.487338242260  | -2.675116958721 |
| H | -10.918651371397 | 4.041794516400  | -3.191354157117 |
| O | -8.388263241079  | 2.545878719746  | -2.541364072137 |
| N | 7.184185406198   | 0.802361099299  | 3.886710013393  |
| C | 7.971586266288   | 1.622343357050  | 4.694096205582  |
| C | 7.639273543623   | -0.514657501966 | 3.987870834565  |
| C | 8.963769429418   | 0.816845682118  | 5.303257124507  |
| C | 8.743571114299   | -0.512460667294 | 4.853898485767  |
| H | 9.318332848628   | -1.405004931610 | 5.144650619615  |
| C | 7.764943919715   | 3.103682322162  | 4.877495150245  |
| H | 8.747768087103   | 3.611332353188  | 4.729688161585  |
| H | 7.093694072821   | 3.519094783698  | 4.094588342713  |
| C | 7.238944687643   | 3.542778925219  | 6.266182654365  |
| H | 7.853978333389   | 3.111543230183  | 7.094549035521  |
| H | 7.361833884385   | 4.647421375923  | 6.392715031666  |
| C | 5.782564463792   | 3.226218109589  | 6.563971200722  |
| C | 5.182803909481   | 3.757207724854  | 7.848683766919  |
| H | 4.291289987898   | 4.373964820463  | 7.586982178644  |
| H | 4.808200360357   | 2.904054011480  | 8.459006754694  |
| H | 5.892321648292   | 4.354219337771  | 8.457529353775  |
| O | 5.102061141437   | 2.570896527086  | 5.765930998312  |
| C | 6.981184184588   | -1.703253143245 | 3.351878601006  |
| H | 5.898238613816   | -1.736704613871 | 3.630246967142  |
| H | 7.427069602826   | -2.608158228445 | 3.819607044971  |
| C | 7.119492709877   | -1.853227010014 | 1.797026669093  |
| H | 6.578413271996   | -1.022848524745 | 1.284916876080  |
| H | 8.191127534696   | -1.721143498746 | 1.530068052821  |
| C | 6.667947933812   | -3.187080773002 | 1.276237412483  |

|   |                 |                 |                 |
|---|-----------------|-----------------|-----------------|
| C | 7.433405487801  | -4.306283363903 | 0.907426186046  |
| N | 5.314547169197  | -3.534846472726 | 1.153993584543  |
| C | 6.509869620169  | -5.333934896767 | 0.533602780342  |
| C | 5.209313550016  | -4.848388644788 | 0.683370208047  |
| H | 6.770167280146  | -6.353721642255 | 0.210433611956  |
| C | 4.219421991292  | -2.587805178565 | 1.252017801871  |
| H | 3.279502896576  | -3.148586998170 | 1.454637075109  |
| H | 4.372023879181  | -1.930283966775 | 2.139193187182  |
| C | 3.914420490120  | -5.581397064232 | 0.436317995400  |
| H | 4.161825642887  | -6.663263138995 | 0.489447376938  |
| H | 3.187152611374  | -5.404210664484 | 1.263095993010  |
| C | 3.201333629580  | -5.316469648579 | -0.918985463628 |
| H | 3.891691128616  | -4.852689812385 | -1.666384300345 |
| H | 2.904977470506  | -6.278134558207 | -1.409596664545 |
| C | 1.938645060039  | -4.474759375548 | -0.882551588614 |
| C | 1.234460518563  | -4.189527502962 | -2.208162743335 |
| C | 0.904232450601  | -2.676445033930 | -2.374290868182 |
| H | 1.867244621828  | -2.126236771006 | -2.442013913851 |
| H | 0.430124460157  | -2.318930209909 | -1.432038664716 |
| C | 0.068614498774  | -2.285257975092 | -3.558430253541 |
| C | 0.458815878114  | -1.761860041021 | -4.797253402293 |
| N | -1.334665040340 | -2.354383872910 | -3.550563549063 |
| C | -0.742721891970 | -1.497843148448 | -5.538452244815 |
| C | -1.838222179410 | -1.861674525904 | -4.755950597265 |
| H | -0.788290863128 | -1.096952563219 | -6.561425022953 |
| C | -2.145092410309 | -2.815370819865 | -2.439086245467 |
| H | -1.646347542419 | -3.690713032415 | -1.959375141418 |
| H | -3.104092561734 | -3.221078880542 | -2.835780313824 |
| H | 1.832663523683  | -4.558921450674 | -3.070058243214 |
| H | 0.295477479517  | -4.796225790234 | -2.202699488767 |
| O | 1.481956744755  | -4.041389870477 | 0.184063318158  |
| C | -3.316530998977 | -1.769750470520 | -5.029747129656 |
| H | -3.792322235671 | -2.781899264333 | -5.008677546046 |
| H | -3.819919471064 | -1.195638307728 | -4.213637358548 |
| C | -3.653494339619 | -1.102436631365 | -6.391117471356 |
| H | -3.323135037612 | -1.778922891342 | -7.212834016281 |
| H | -3.040563757002 | -0.178777603639 | -6.500490936378 |
| C | -5.111198457241 | -0.793360872450 | -6.571884800965 |
| C | -6.145425621748 | -1.649982204344 | -7.016718474083 |
| N | -5.679894489899 | 0.446973161707  | -6.274022973524 |
| C | -7.350281088345 | -0.894990878955 | -6.975071506058 |
| C | -7.052961587066 | 0.395862454017  | -6.514463445794 |
| H | -8.352046536165 | -1.244560577033 | -7.267114026318 |
| C | -7.964209564308 | 1.565298829355  | -6.308376728095 |
| H | -7.665313082774 | 2.451561269588  | -6.917367310838 |
| H | -8.993947480103 | 1.290395772862  | -6.618327898504 |
| H | -8.011097346558 | 1.898387331978  | -5.243682158970 |
| C | -4.968433528615 | 1.611352652974  | -5.749947337183 |
| H | -3.917365616806 | 1.572936361698  | -6.116195981522 |
| H | -5.410986182508 | 2.529129509481  | -6.200358532073 |
| C | -4.987375241505 | 1.717825342536  | -4.212028631200 |
| H | -6.028567308776 | 1.911669817123  | -3.866402697972 |
| H | -4.702980329221 | 0.731970556746  | -3.773106094021 |
| C | -4.029002879649 | 2.797980402517  | -3.678038282241 |
| H | -4.182575598998 | 3.755755020913  | -4.235050874932 |
| H | -2.978572514211 | 2.487917814415  | -3.899902132029 |

|   |                 |                 |                 |
|---|-----------------|-----------------|-----------------|
| C | -4.187172994740 | 3.058167304556  | -2.166028761255 |
| H | -3.271879329959 | 3.568865466327  | -1.775968481743 |
| H | -4.230368561843 | 2.076048386108  | -1.635182839226 |
| C | -5.428209308481 | 3.894654362315  | -1.808410876615 |
| H | -5.308830792647 | 4.927881962223  | -2.212583433977 |
| H | -6.337946400957 | 3.473541349034  | -2.288762028220 |
| C | -5.678859588597 | 3.960650734480  | -0.290470292714 |
| H | -5.914903613266 | 2.945326113935  | 0.098894389943  |
| H | -4.749539048547 | 4.267417287751  | 0.242302305933  |
| C | 3.061659804342  | 3.274546451421  | -5.960085041847 |
| C | 1.014534678845  | 4.095302062171  | -5.367364974587 |
| C | 0.796859426164  | 2.963598225166  | -6.173361554850 |
| H | 2.284824930221  | 1.596583973548  | -7.192086784292 |
| C | 2.083794570725  | 2.460485116707  | -6.539833921482 |
| N | 2.398726681096  | 4.261085112743  | -5.228431860414 |
| C | 3.046604762832  | 5.349735035448  | -4.504874235500 |
| H | 4.124710321344  | 5.091072294985  | -4.398407233720 |
| H | 2.662886126099  | 5.388555738321  | -3.460155319981 |
| C | -0.921239098456 | 7.736242876416  | 0.113909095427  |
| C | -3.011844218382 | 7.633092224795  | 1.037417287068  |
| C | -2.662626906885 | 8.991026340194  | 0.931020282192  |
| H | -0.779871297710 | 9.951565814959  | 0.123902161734  |
| C | -1.353248849936 | 9.040915795173  | 0.356529037249  |
| N | -1.945785326769 | 6.876999253106  | 0.523733192393  |
| C | -1.774157317494 | 5.440582622615  | 0.696545769521  |
| H | -1.473739705377 | 4.967087554978  | -0.265841902264 |
| C | 2.933557237434  | 6.725618307109  | -5.153139620503 |
| C | 3.120651248317  | 7.879097996622  | -4.355801474417 |
| C | 2.680199998198  | 6.881588099408  | -6.531986306271 |
| C | 3.048412194856  | 9.159418507335  | -4.921017807362 |
| H | 3.339843086172  | 7.772109470841  | -3.275969315106 |
| C | 2.606268481580  | 8.163979477116  | -7.102186420551 |
| H | 2.533182041982  | 5.991420216296  | -7.169700646683 |
| C | 2.785982213739  | 9.312813501868  | -6.300617699399 |
| H | 3.192371456447  | 10.065334246889 | -4.306564491779 |
| H | 2.407328492369  | 8.276434036020  | -8.181181637344 |
| C | 4.025411196330  | -1.720567940795 | 0.008067208843  |
| C | 3.052336953061  | -0.699767681670 | 0.014734142154  |
| C | 4.804942855962  | -1.914835354613 | -1.154649585702 |
| C | 2.869904360209  | 0.127892929957  | -1.115372534855 |
| H | 2.451610510148  | -0.519309512845 | 0.926038002396  |
| C | 4.617609489351  | -1.099371215193 | -2.286993637874 |
| H | 5.579882090067  | -2.701932281844 | -1.166852479388 |
| C | 3.660537123856  | -0.074784296990 | -2.269731619265 |
| H | 5.237612028051  | -1.256297781019 | -3.187621104572 |
| H | 3.506972821202  | 0.564617469281  | -3.152368904726 |
| C | -2.453940559448 | -1.786491842979 | -1.353893798724 |
| C | -3.256924418548 | -2.183103068725 | -0.253775210278 |
| C | -1.955655446036 | -0.465562456050 | -1.395826291839 |
| C | -3.534400066403 | -1.294604294770 | 0.794786195370  |
| H | -3.681964593714 | -3.204211477354 | -0.226537032428 |
| C | -2.235974703214 | 0.453936907836  | -0.341421490084 |
| H | -1.387039709137 | -0.127770837043 | -2.281922372341 |
| C | -3.029598534645 | 0.028603016036  | 0.769404653168  |
| H | -4.159572751547 | -1.601942857138 | 1.651536169517  |
| H | -2.000231097964 | 1.525687634290  | -0.471681065899 |



|   |                  |                 |                 |
|---|------------------|-----------------|-----------------|
| H | -2.767703928188  | 4.998546807763  | 0.933841486869  |
| C | -0.772956787582  | 5.057041042745  | 1.782932101937  |
| C | -0.651239726156  | 5.809191272301  | 2.973077451720  |
| C | 0.060715972768   | 3.933187844688  | 1.597783829146  |
| C | 0.280113420650   | 5.440642423636  | 3.957761717840  |
| H | -1.280499289858  | 6.705923426496  | 3.121900207821  |
| C | 0.997458060375   | 3.565627679625  | 2.578296837605  |
| H | 0.001858988070   | 3.352797376952  | 0.661862295106  |
| C | 1.109994459774   | 4.312538721448  | 3.774615010818  |
| H | 0.387704075879   | 6.032491032755  | 4.883543956639  |
| H | 1.685702062203   | 2.720686045348  | 2.397824855849  |
| C | 2.709364177337   | 10.711761889755 | -6.848935742621 |
| C | 1.875116543684   | 1.241390125837  | -1.073953298216 |
| C | -3.391190243495  | 0.929775362984  | 1.916102581186  |
| C | 2.133810105204   | 3.972677536955  | 4.827422012256  |
| O | 2.476494277079   | 10.733409155744 | -8.188963239394 |
| H | 2.450784039769   | 11.683087405807 | -8.453917032761 |
| O | 2.179523920963   | 2.257890879536  | -1.860509890896 |
| H | 1.555365643326   | 3.069892797567  | -1.755984940946 |
| O | 2.680795987220   | 2.751500677922  | 4.635749195151  |
| H | 3.454540962464   | 2.635628329512  | 5.275788747457  |
| O | -2.969576883191  | 2.219200151669  | 1.735187568512  |
| H | -3.223933793423  | 2.706846427436  | 2.554627420993  |
| O | 2.839611624223   | 11.719094033683 | -6.172545074050 |
| O | 2.431189479424   | 4.727031958802  | 5.744945557961  |
| O | -4.002983756366  | 0.567869447322  | 2.905215251594  |
| O | 0.856083185680   | 1.233607379033  | -0.347265692425 |
| C | -5.993137013245  | -3.084931821804 | -7.440376473504 |
| H | -5.000885532190  | -3.286037573867 | -7.902862877755 |
| H | -6.099948878284  | -3.790267863286 | -6.581767704182 |
| H | -6.769480873541  | -3.368745837903 | -8.183507304193 |
| C | 1.860655283020   | -1.510284549098 | -5.285366728682 |
| H | 2.039436923575   | -0.425857709847 | -5.478234677413 |
| H | 2.629218131066   | -1.851852916158 | -4.559064941466 |
| H | 2.058272713113   | -2.042308738482 | -6.244003645653 |
| C | 8.932274219686   | -4.433594596457 | 0.941025098086  |
| H | 9.281783137123   | -4.969361810907 | 1.854575151059  |
| H | 9.307643166121   | -5.013186326394 | 0.068908190634  |
| H | 9.443133686599   | -3.445989025474 | 0.928681642709  |
| C | 10.032527828513  | 1.281671571373  | 6.254217010909  |
| H | 9.672465418011   | 1.327783371199  | 7.310022098772  |
| H | 10.901613059099  | 0.589176554368  | 6.247400065665  |
| H | 10.414666201375  | 2.295717030233  | 5.997853091849  |
| C | -10.208710023849 | 5.866747761794  | 1.113982056007  |
| H | -10.889577951142 | 5.974250281702  | 0.235994235828  |
| H | -10.568520698081 | 4.992534704204  | 1.701860692965  |
| H | -10.361109514988 | 6.770702773576  | 1.742239926507  |
| C | -3.521775303589  | 10.172147305281 | 1.293287886666  |
| H | -4.061493545532  | 10.584658484933 | 0.408122968993  |
| H | -4.290751783701  | 9.916212956437  | 2.054757310156  |
| H | -2.908807765038  | 11.002745456105 | 1.707088324602  |
| C | -0.532234043073  | 2.379999355678  | -6.572652856344 |
| H | -0.835431140405  | 1.539698368223  | -5.901919402237 |
| H | -1.353028742087  | 3.131923034763  | -6.548009605771 |
| H | -0.496876938191  | 1.967543085827  | -7.605412483623 |
| C | 6.982936225497   | 0.361547472095  | -6.789296745046 |

|    |                 |                 |                 |
|----|-----------------|-----------------|-----------------|
| H  | 6.965407668745  | 0.945443096860  | -7.740250105702 |
| H  | 7.687241735773  | -0.483747225710 | -6.949168045253 |
| H  | 5.964657584614  | -0.070772166699 | -6.658721901090 |
| Cu | -0.385590713631 | -0.150860514413 | 0.594629325284  |
| O  | -0.255634639467 | -2.177761189483 | 1.193165493198  |
| H  | -1.143501996203 | -2.598326773828 | 1.142177071742  |
| H  | 0.360737086216  | -2.849875848521 | 0.768755334891  |
| O  | -0.178953504909 | 0.582081115590  | 2.652878845749  |
| H  | 0.164033910846  | 0.064288505613  | 3.410469339706  |
| H  | 0.013525186007  | 1.525760455179  | 2.865930891408  |
